# Supplementary material for: Analysis of PD-1 related immune transcriptional profile in different cancer types
Source: Springer Nature journal article supplement (doi:10.1186/s12935-018-0712-y), 2018-12-01

**Figure S1**

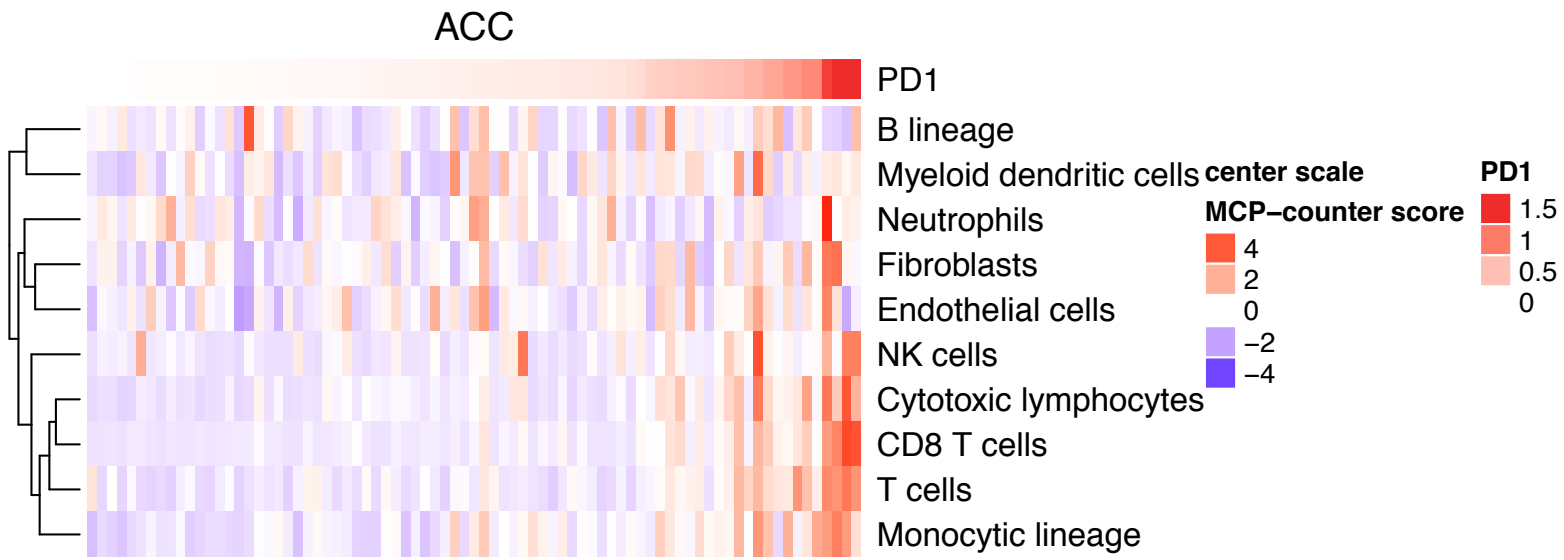

# BLCA

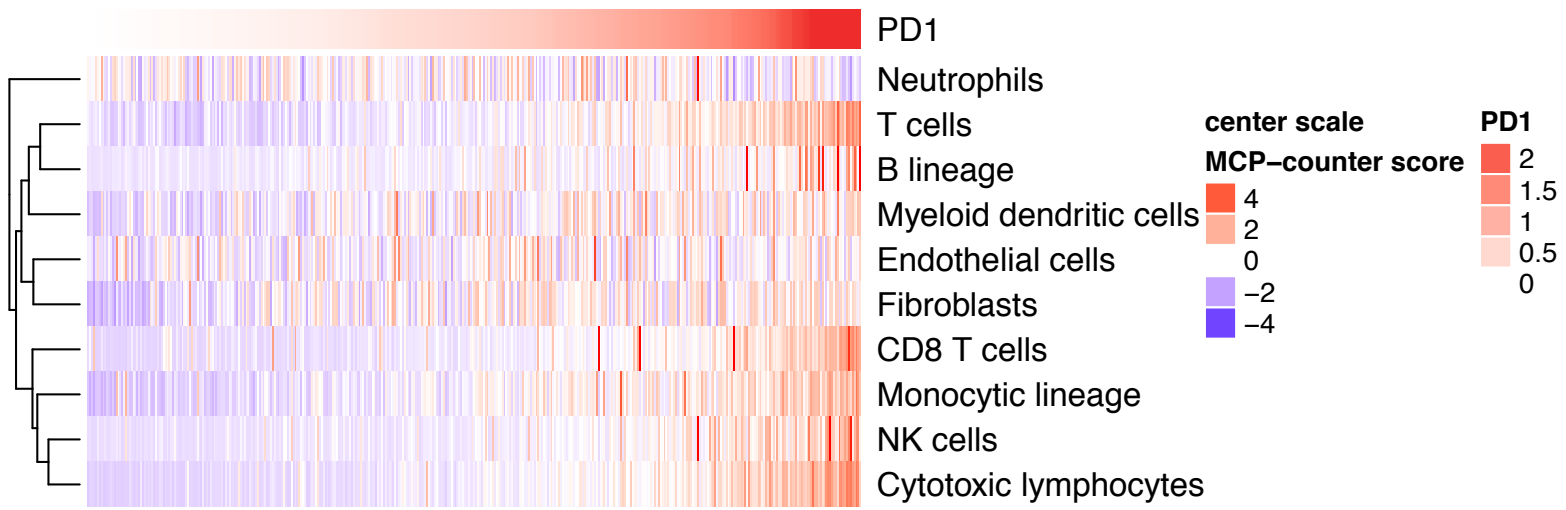

# BRCA

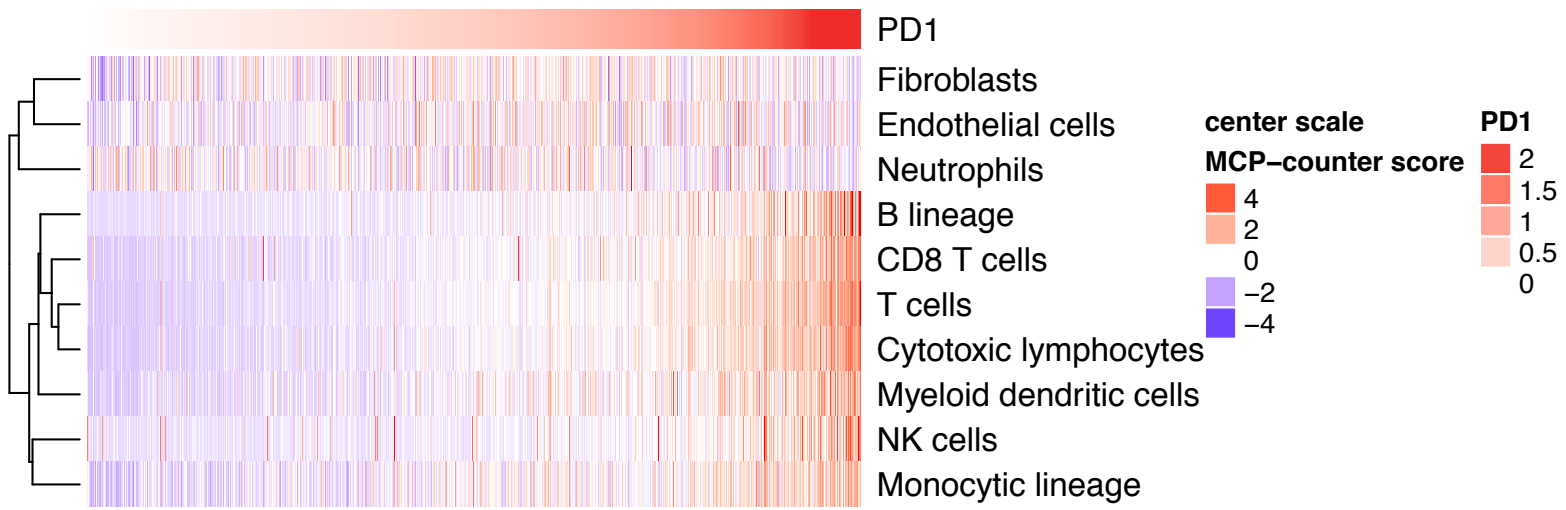

# CESC

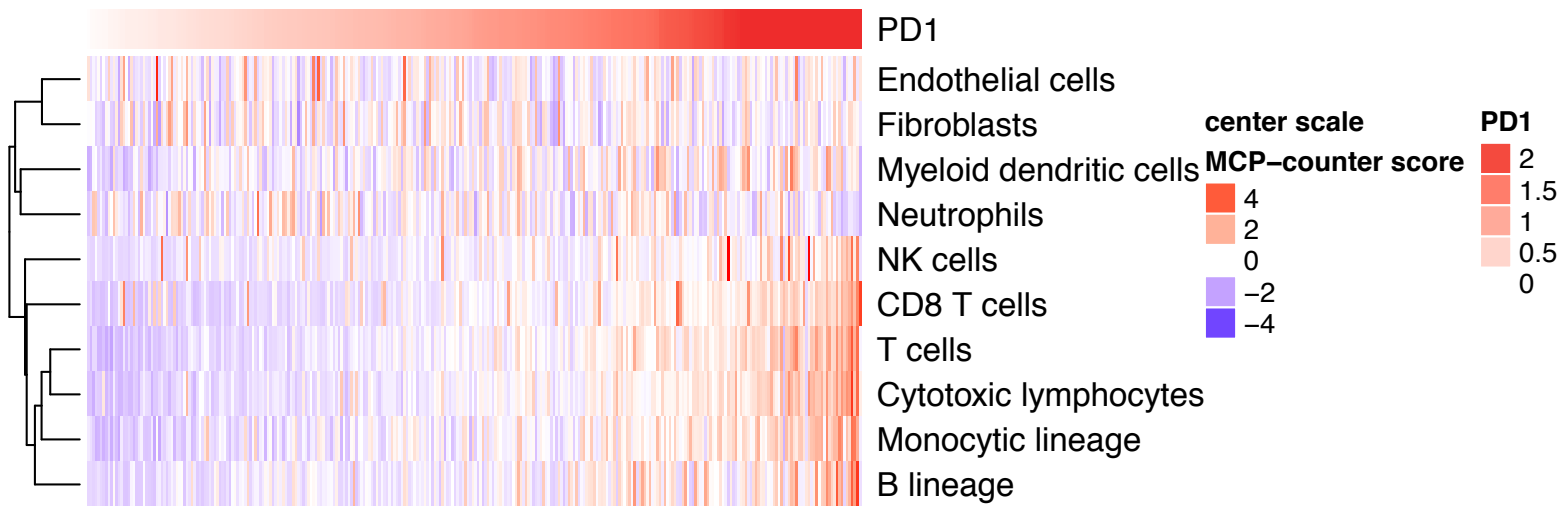

# CHOL

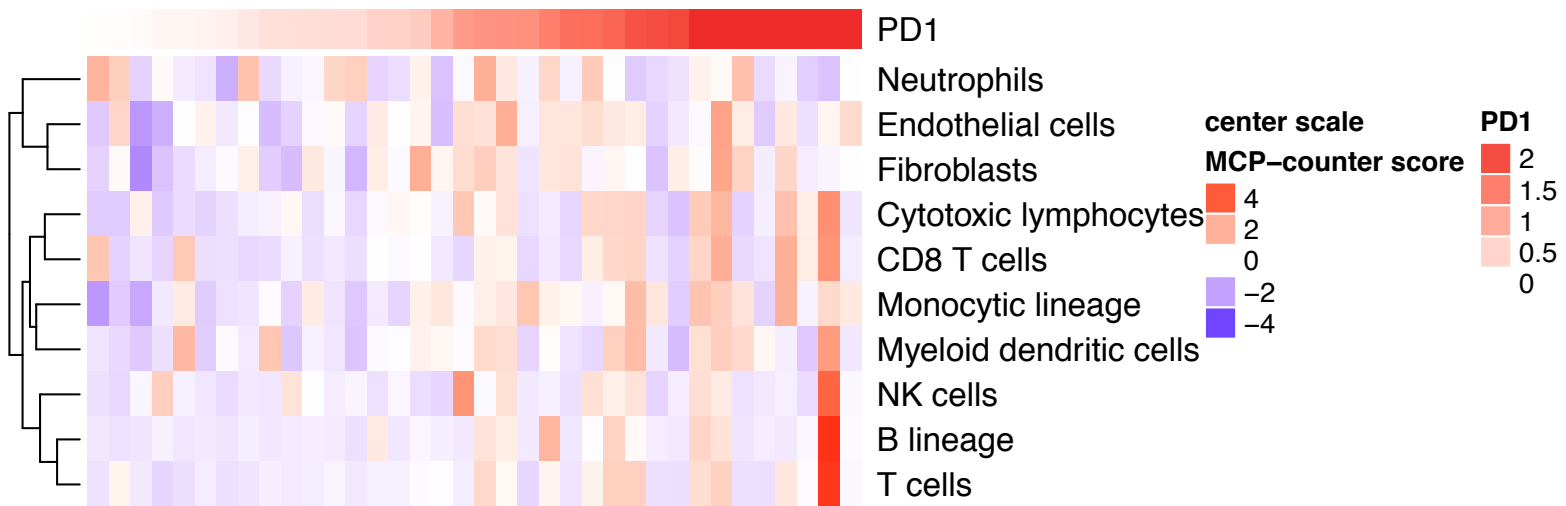

# COAD

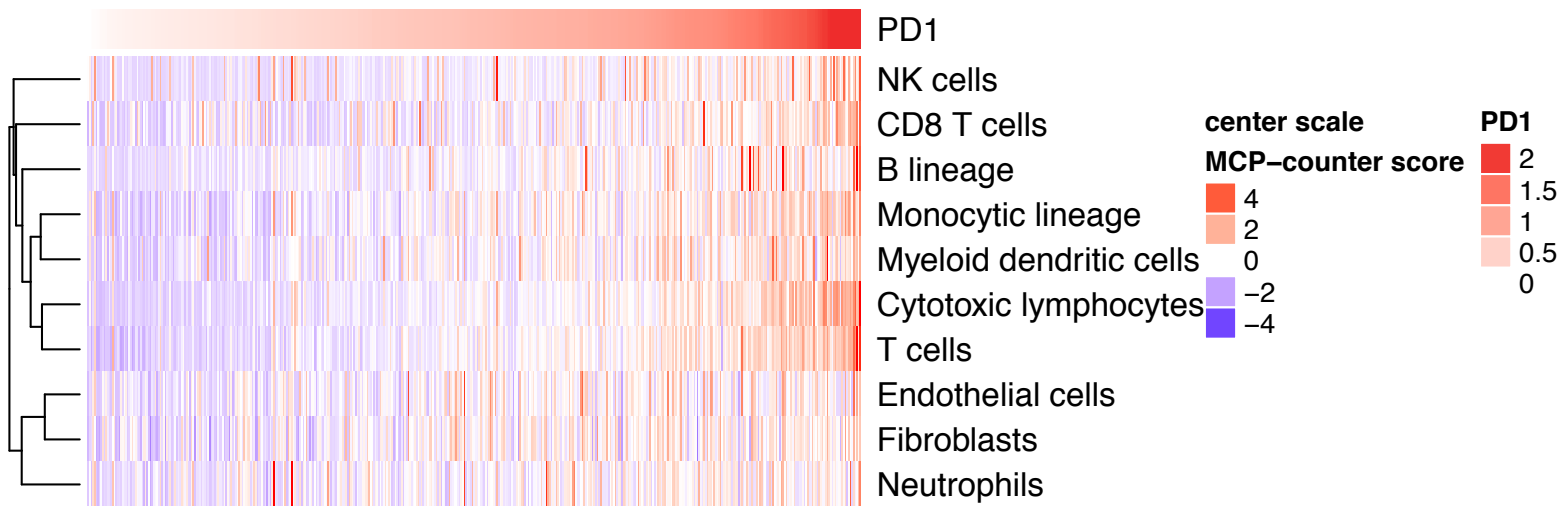

# DLBC

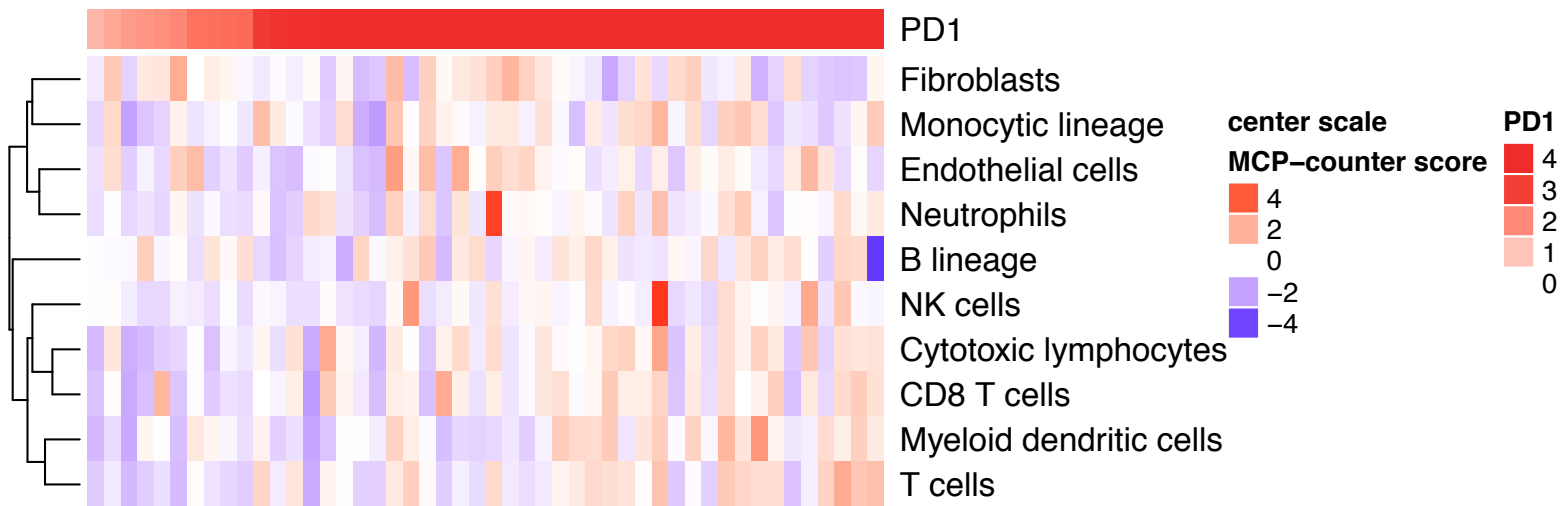

# ESCA

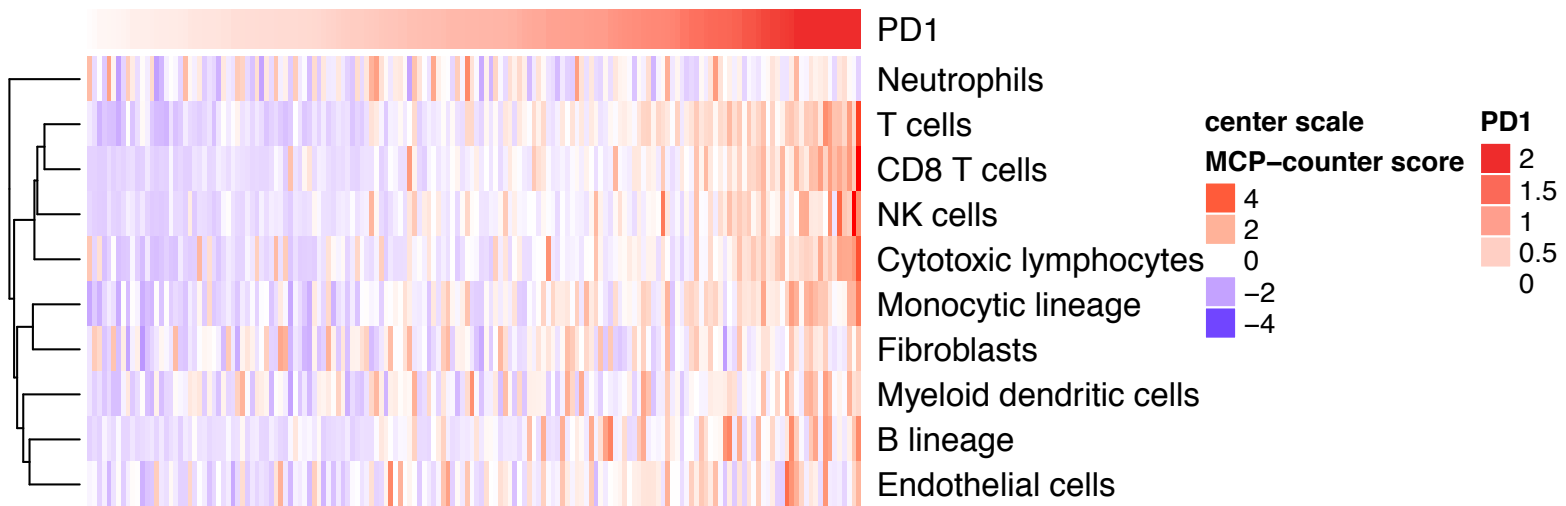



# GBM

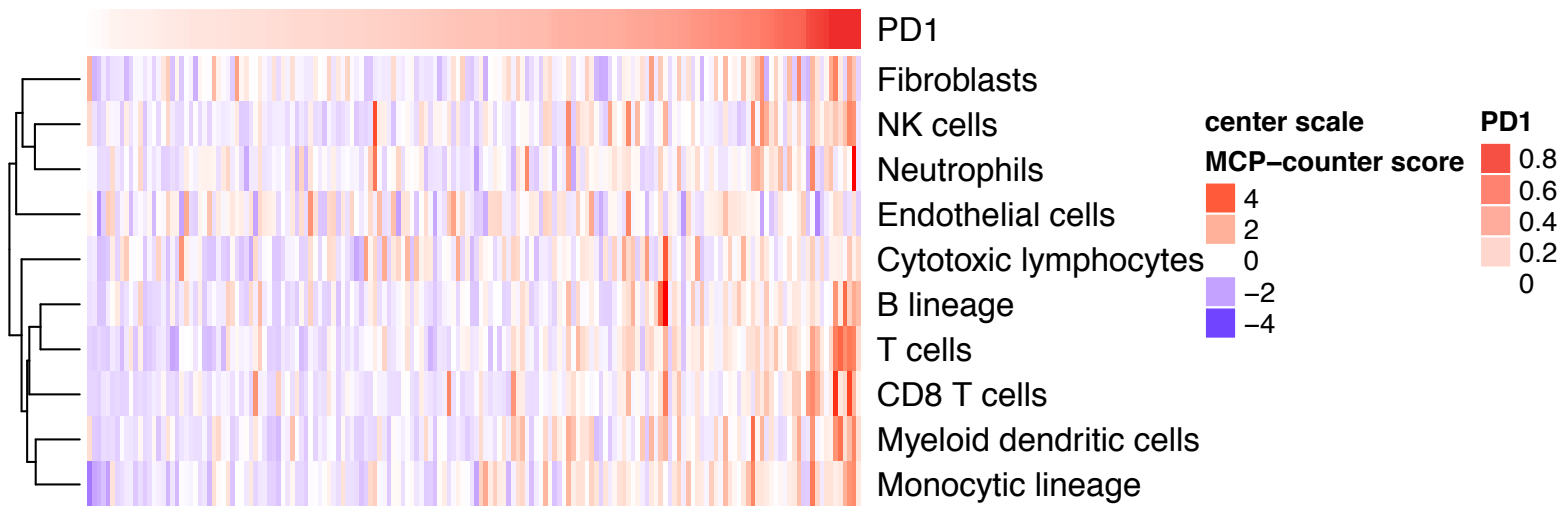

# HNSC

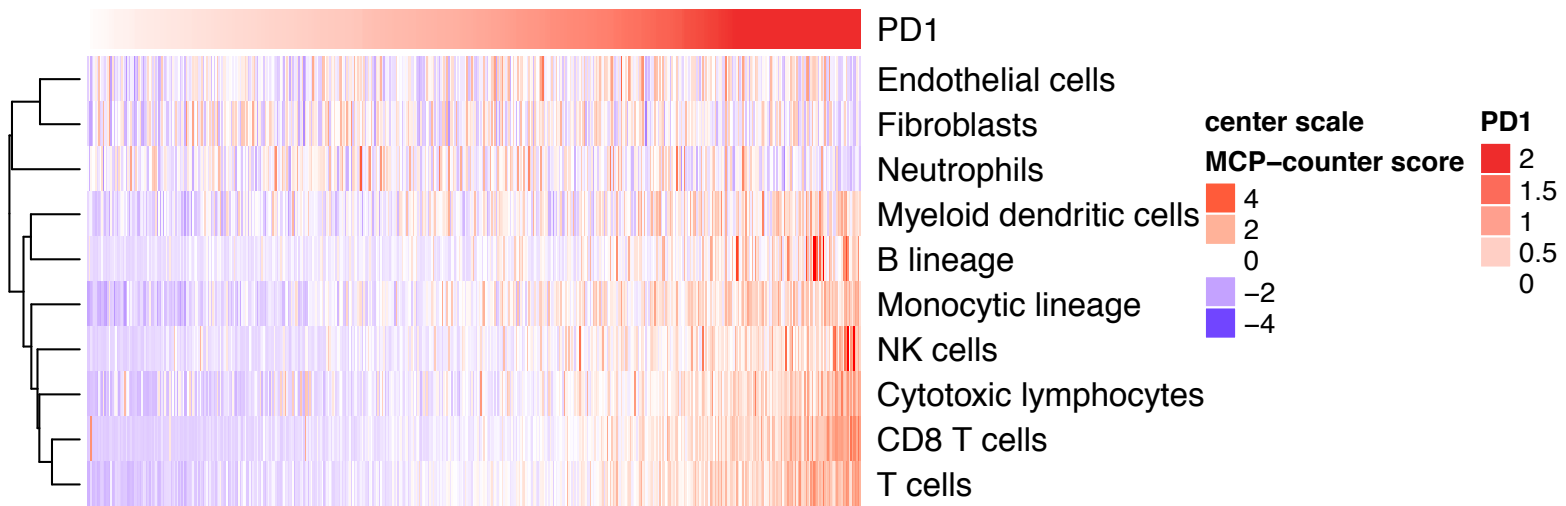

KICH

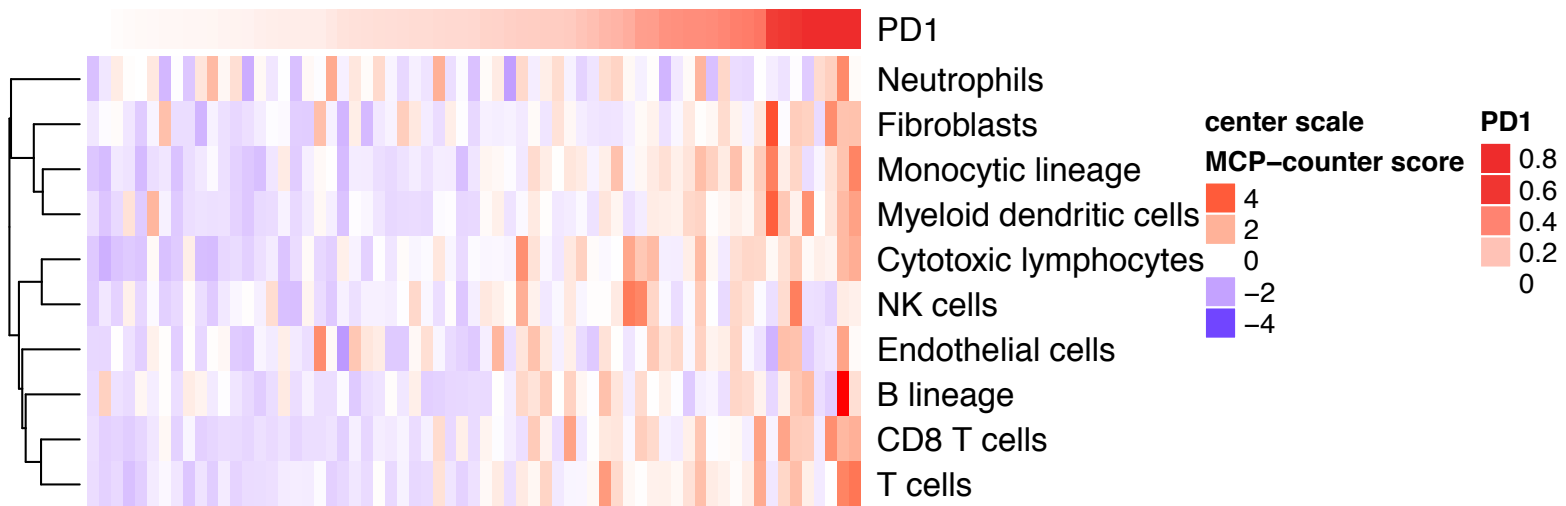

# KIRC

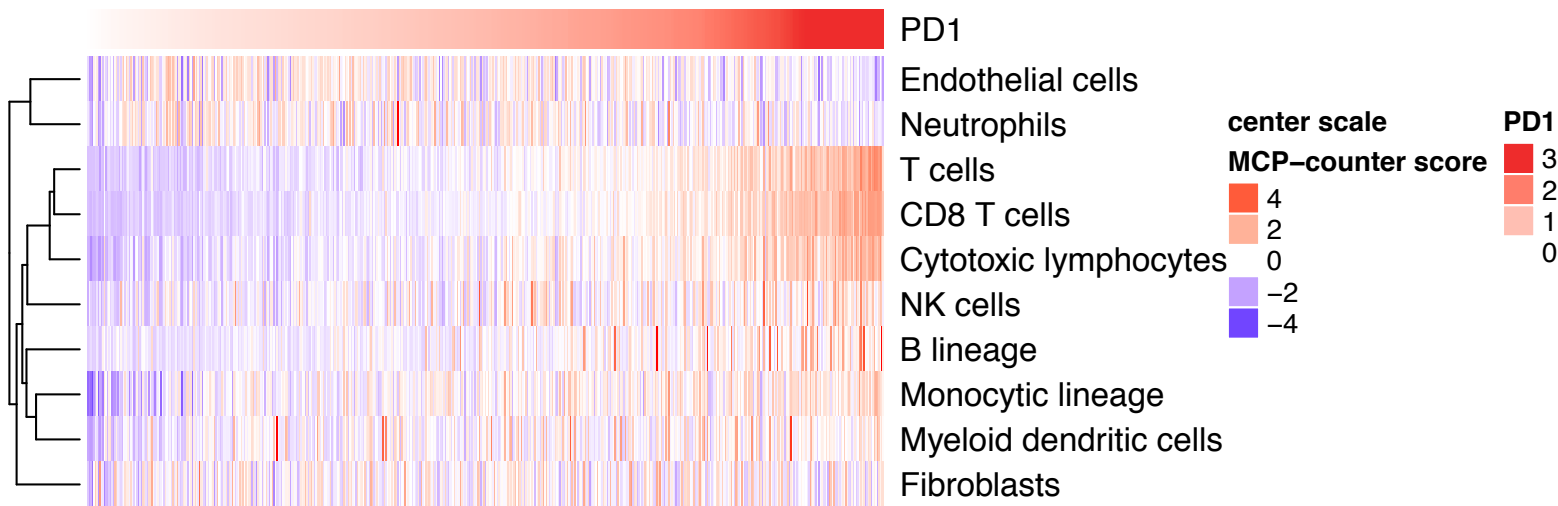

# KIRP

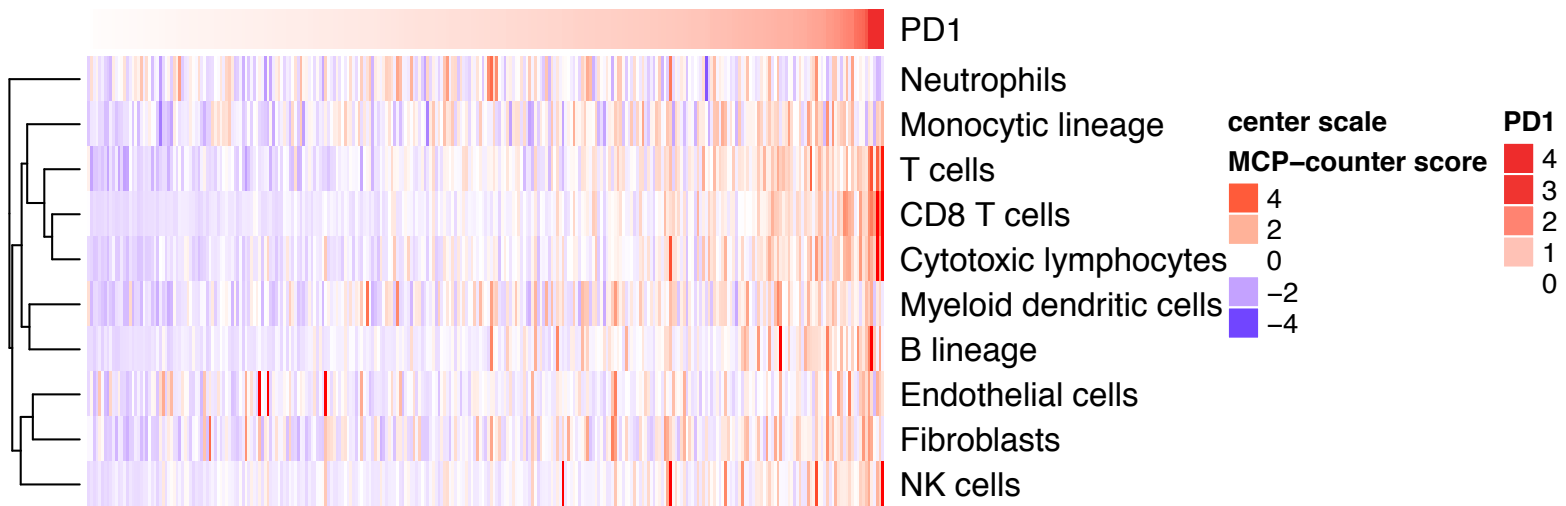

# LAML

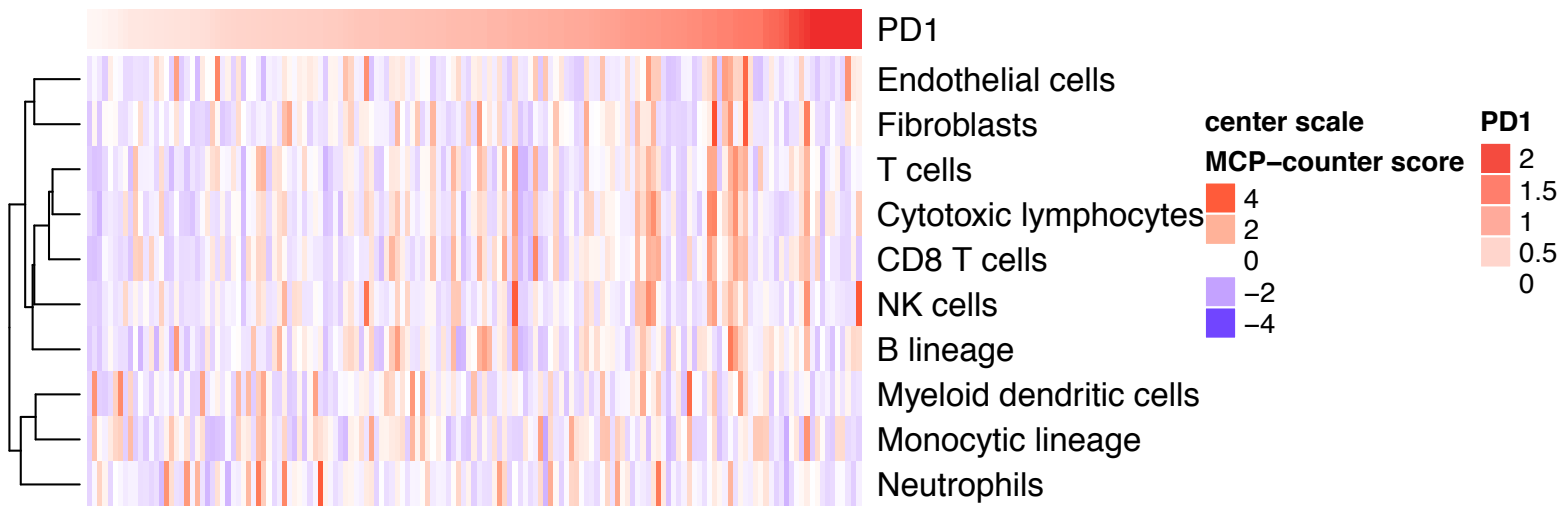

LGG

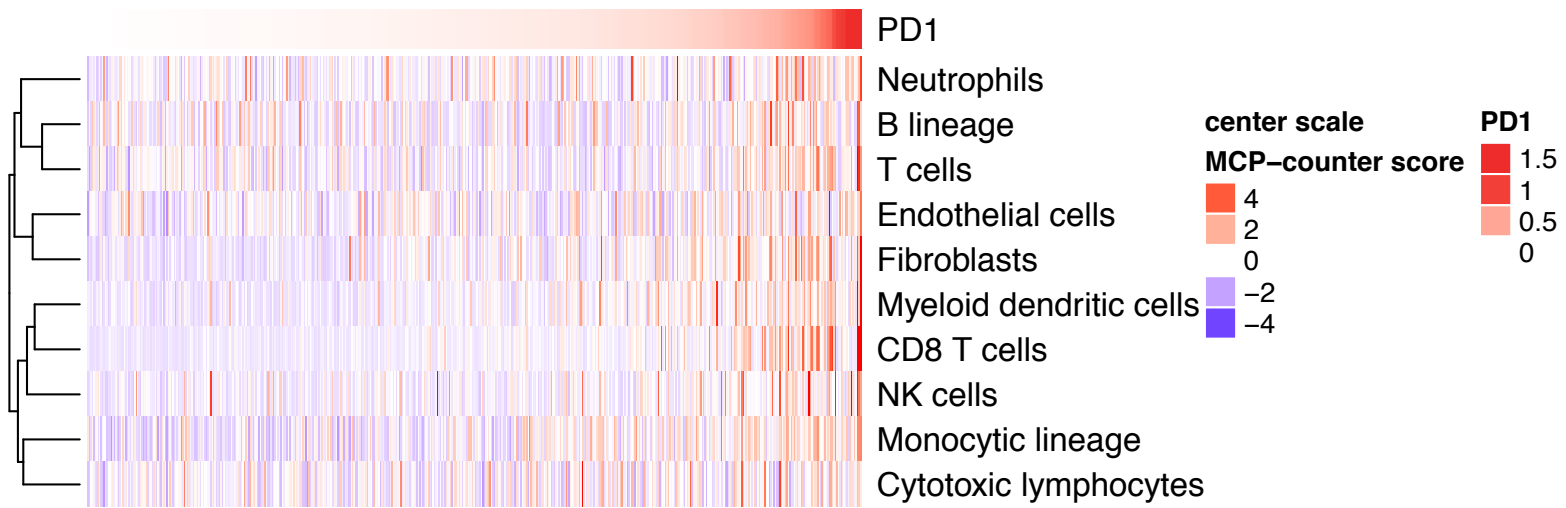

# LIHC

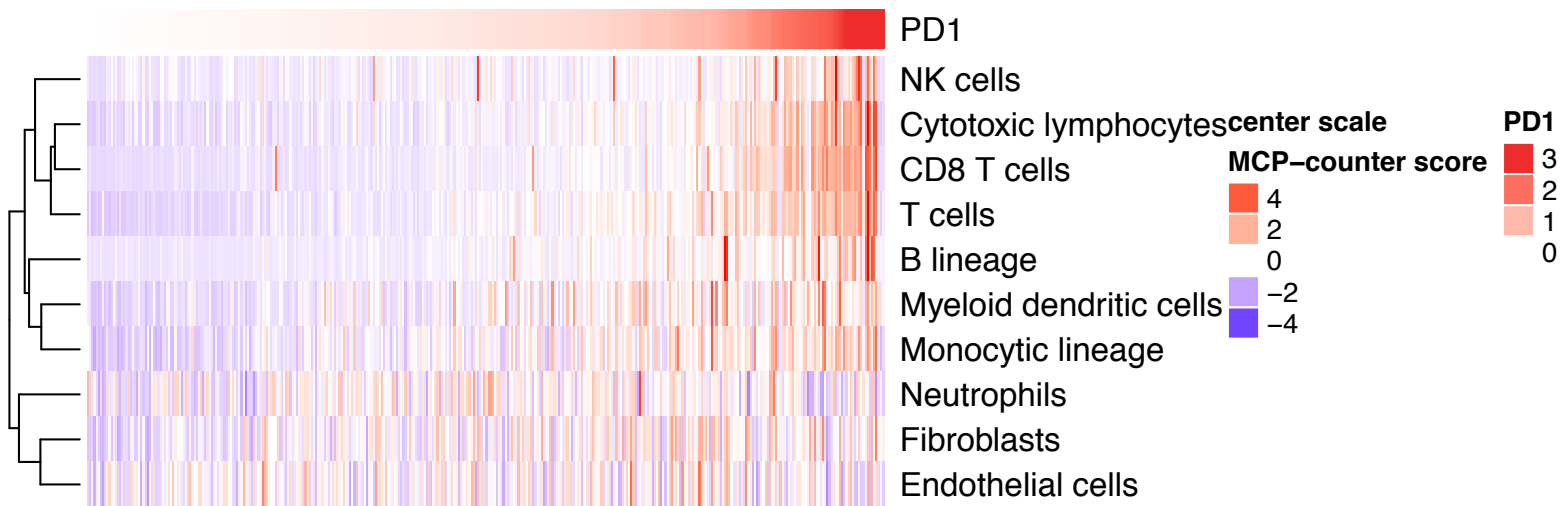



# LUAD

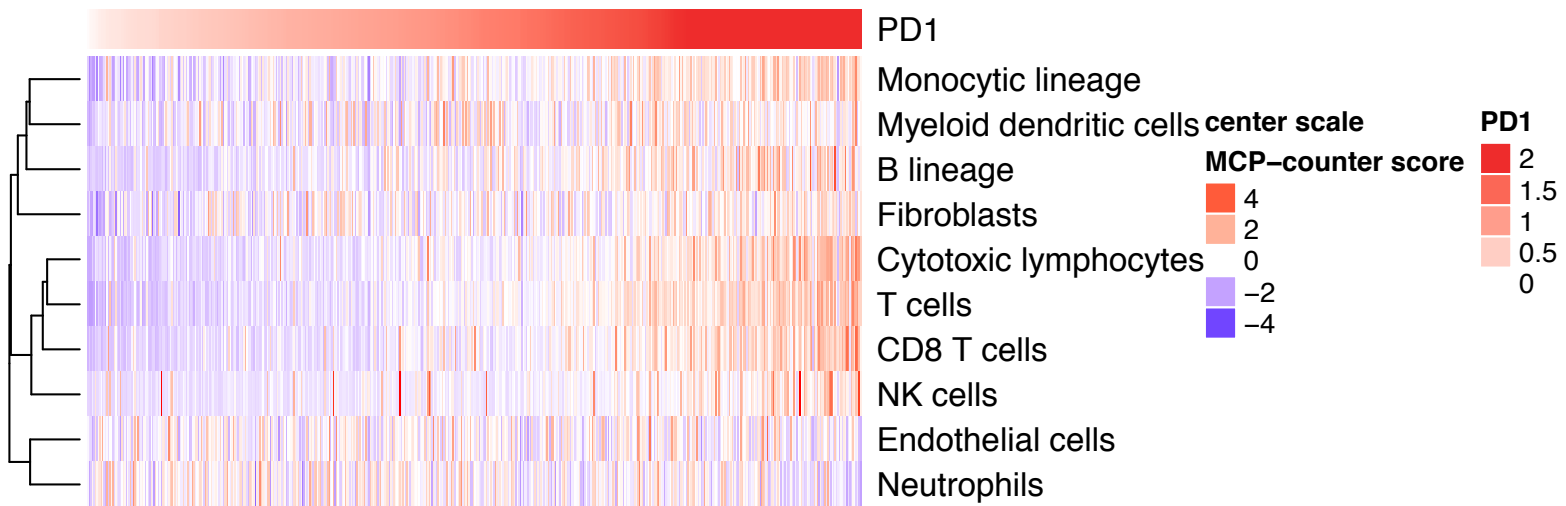

# LUSC

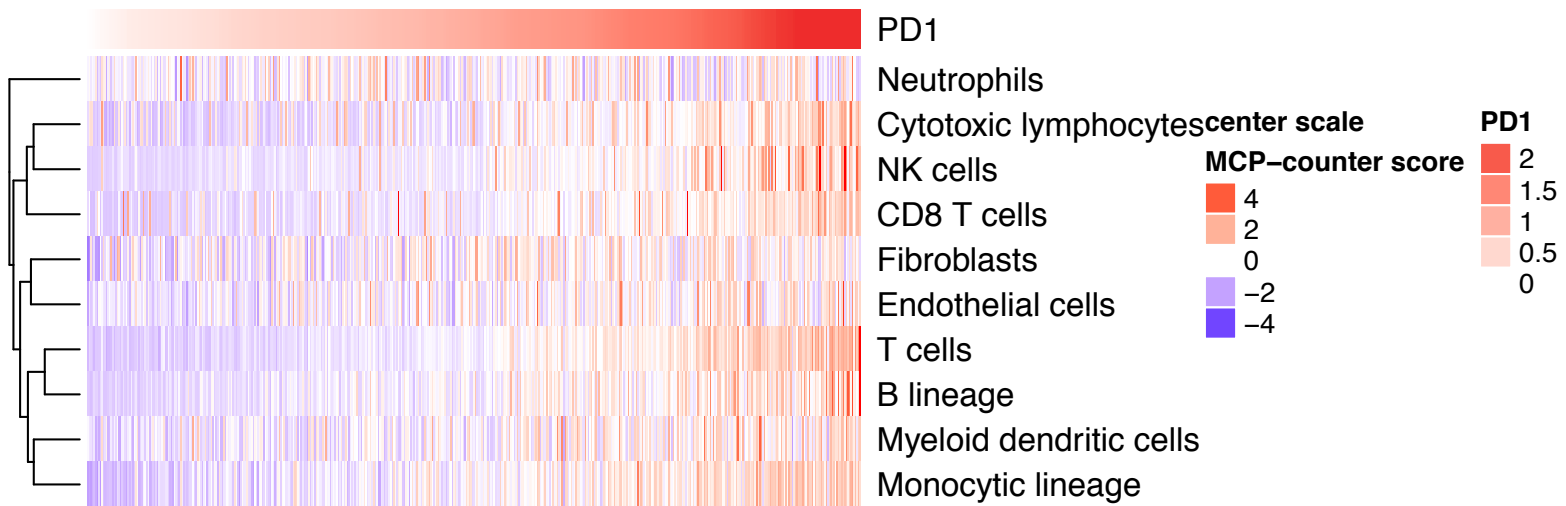

# MESO

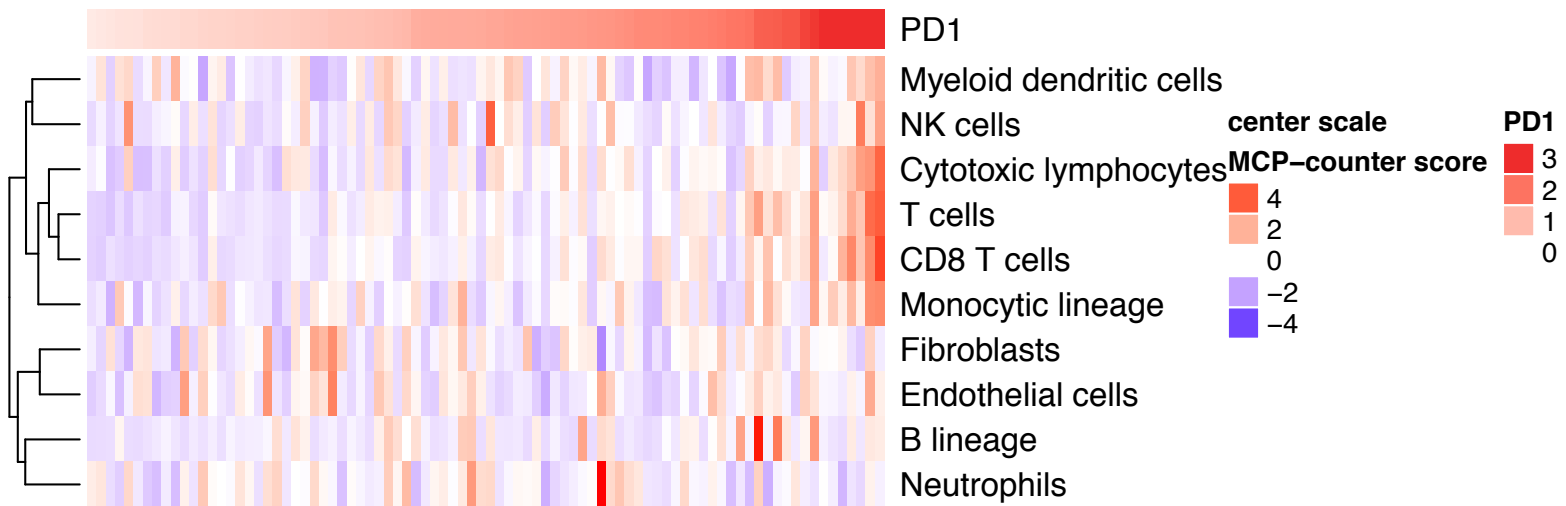

OV

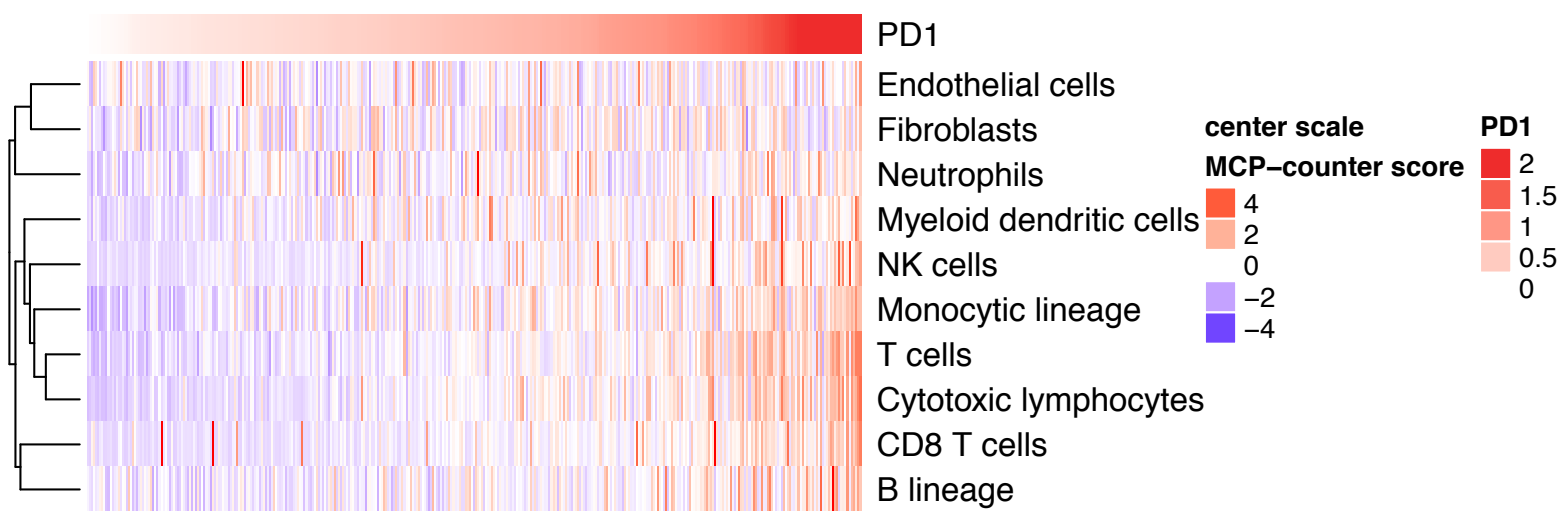

PAAD

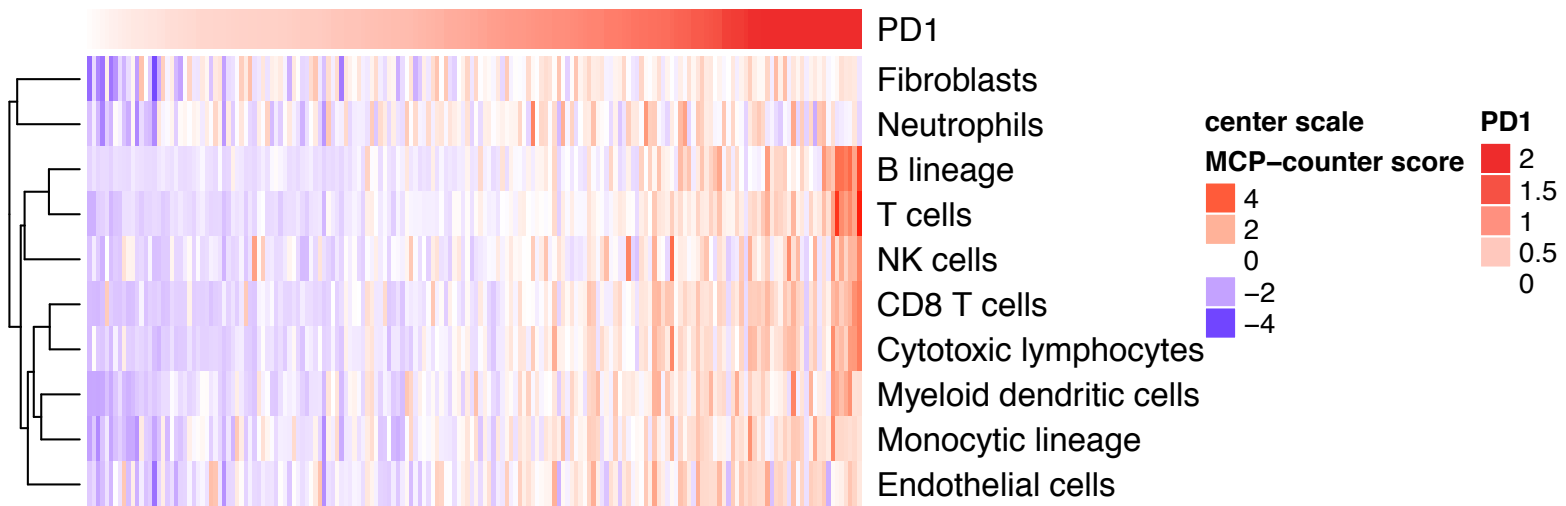

# PCPG

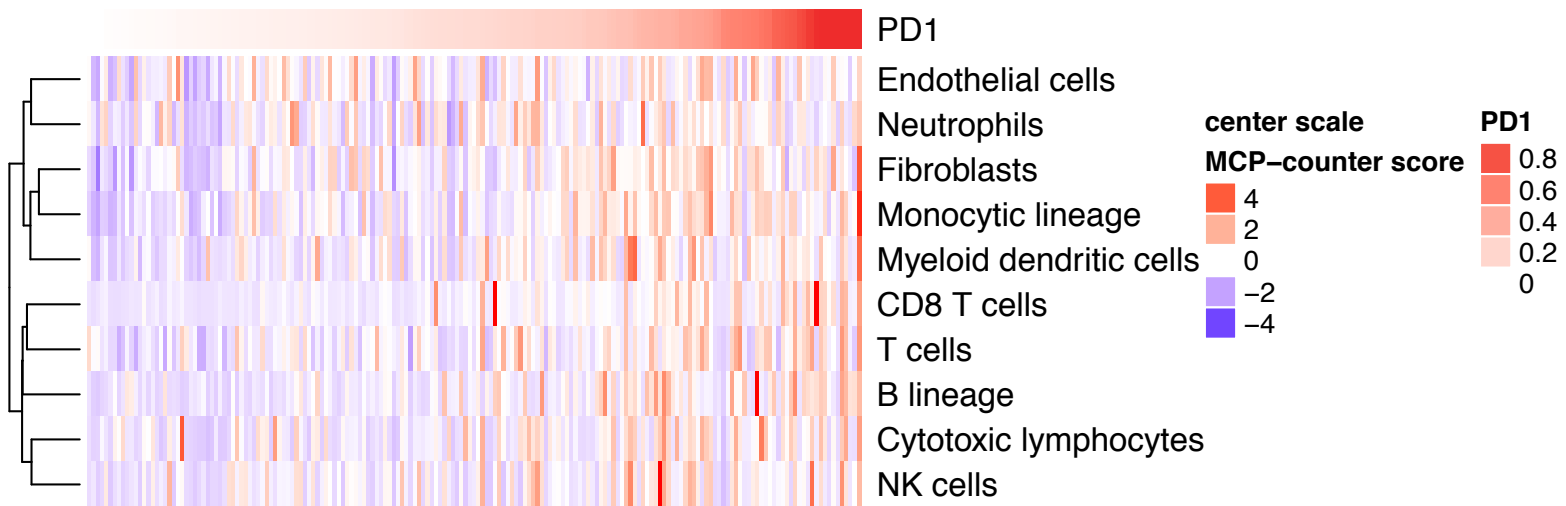

PRAD

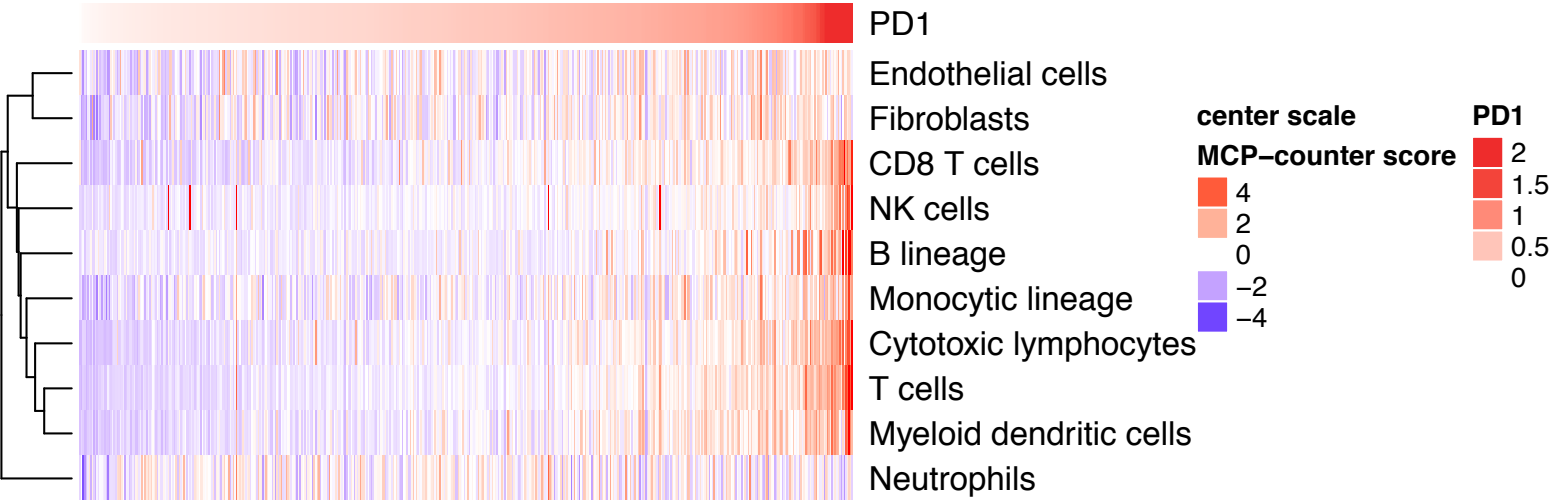

READ

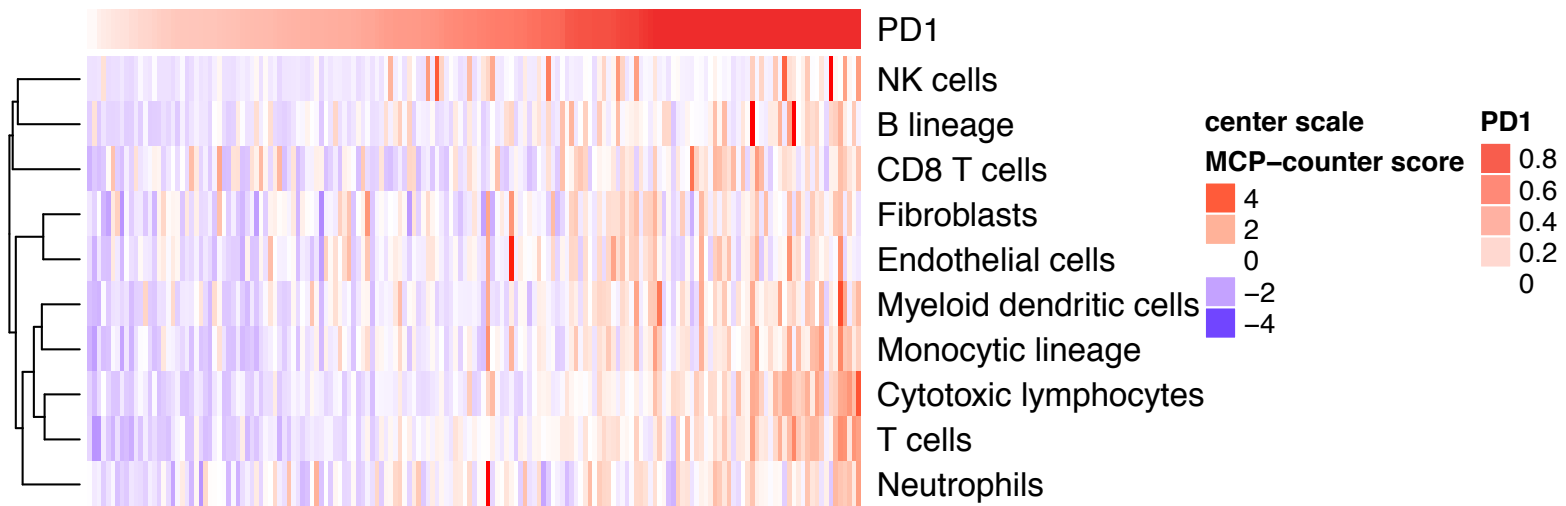



# SARC

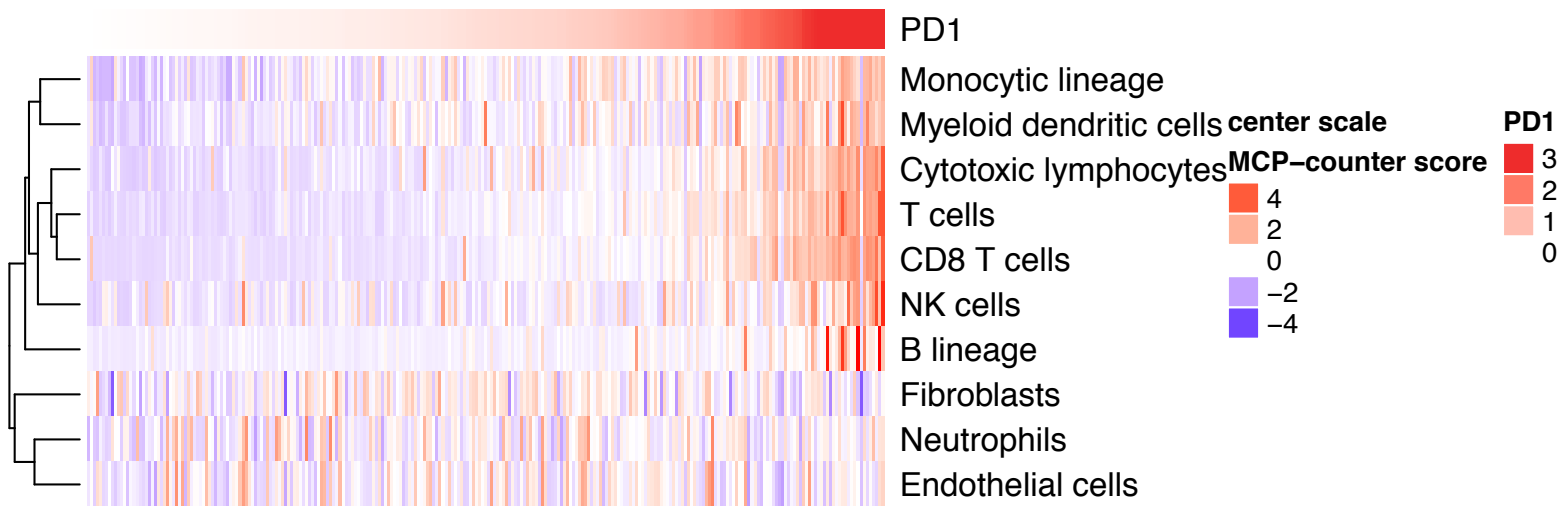

# SKCM

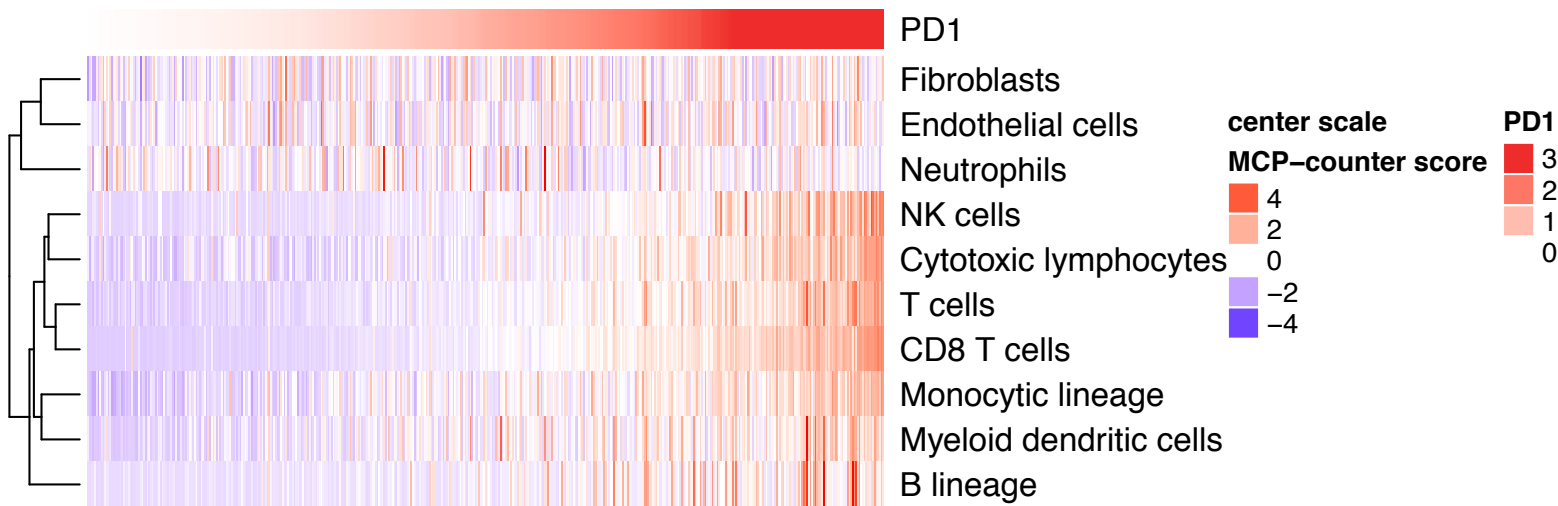

# STAD

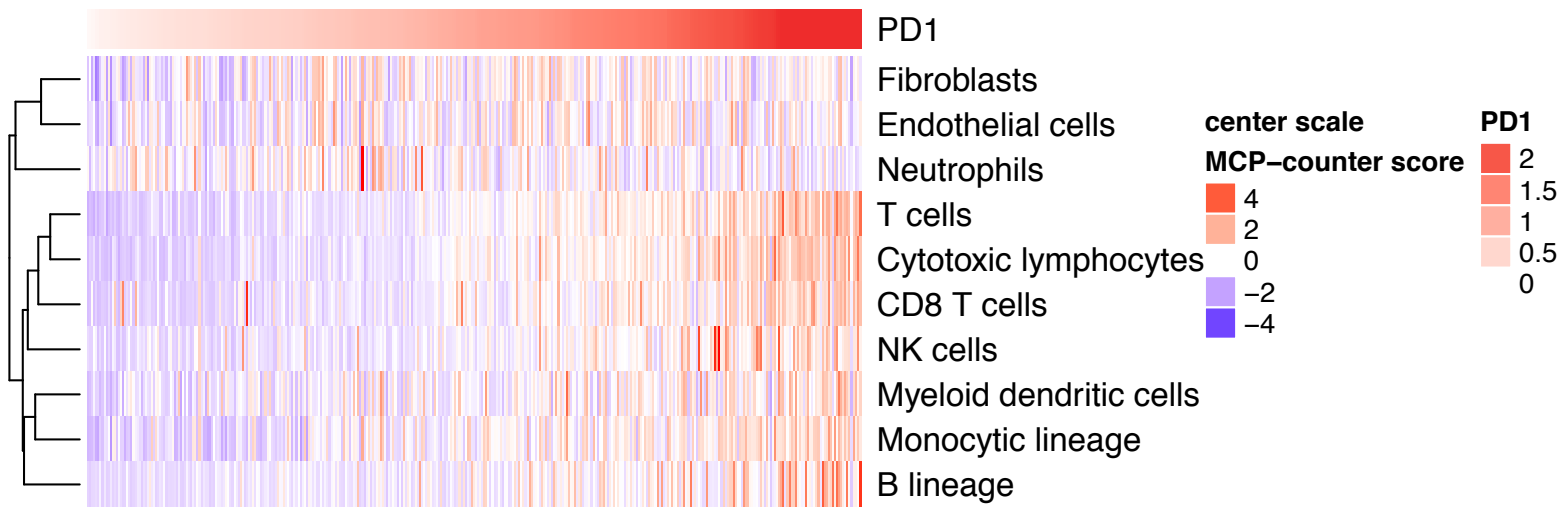

# TGCT

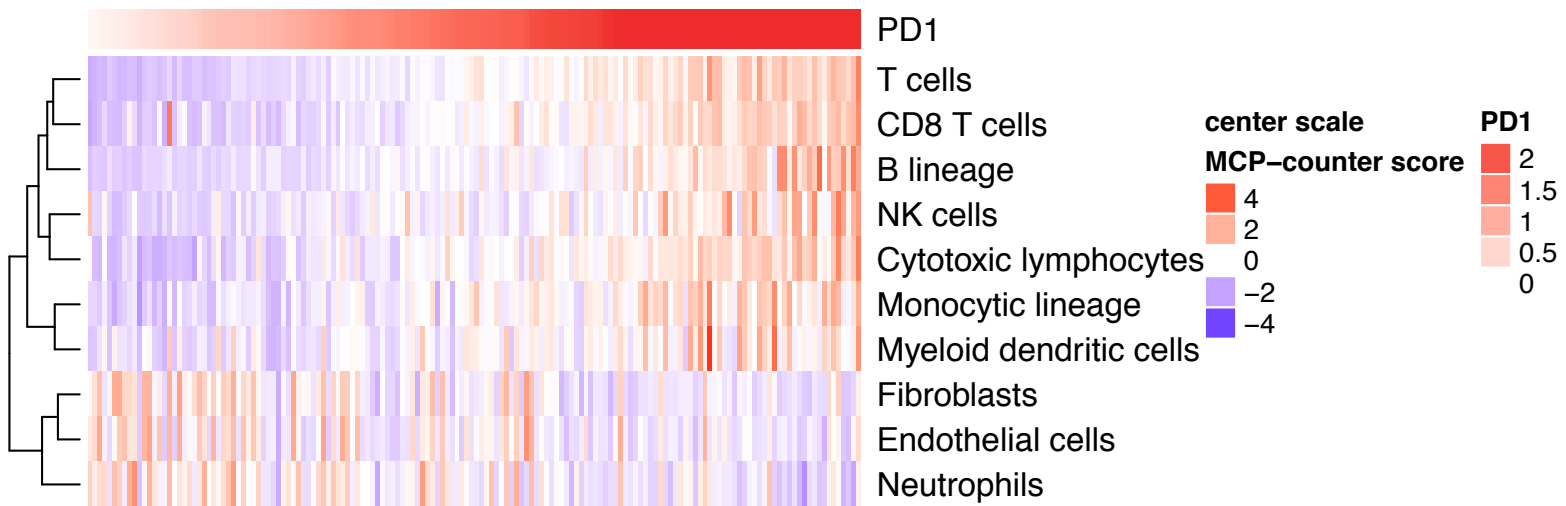

# THCA

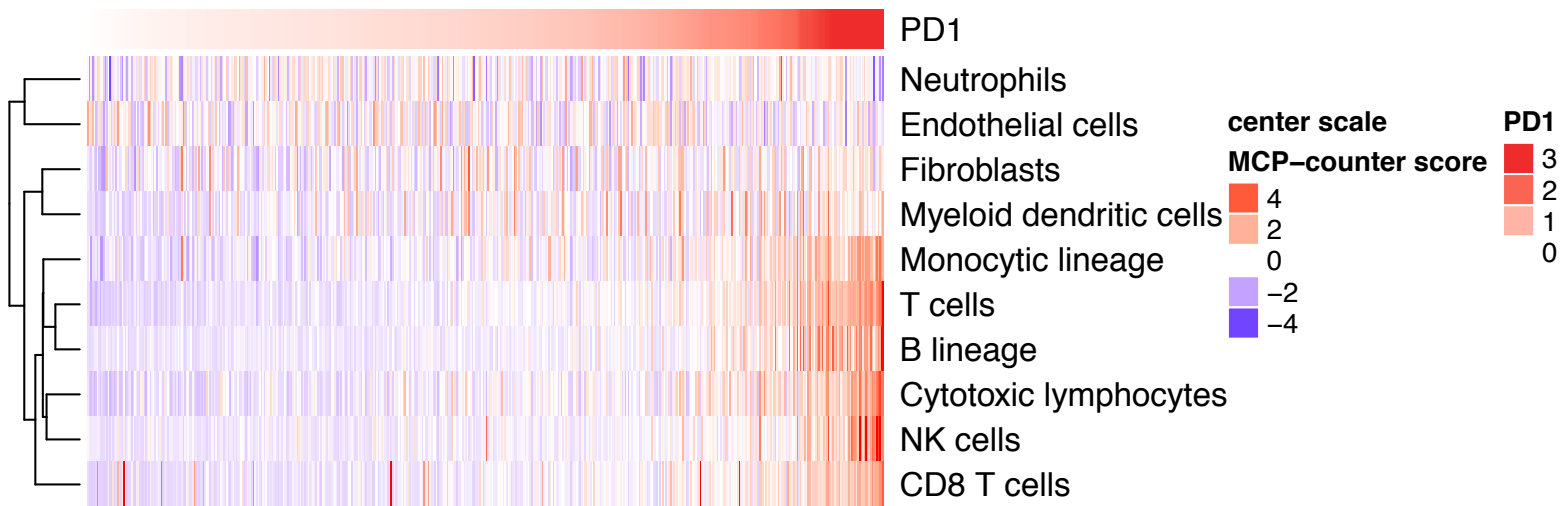

# THYM

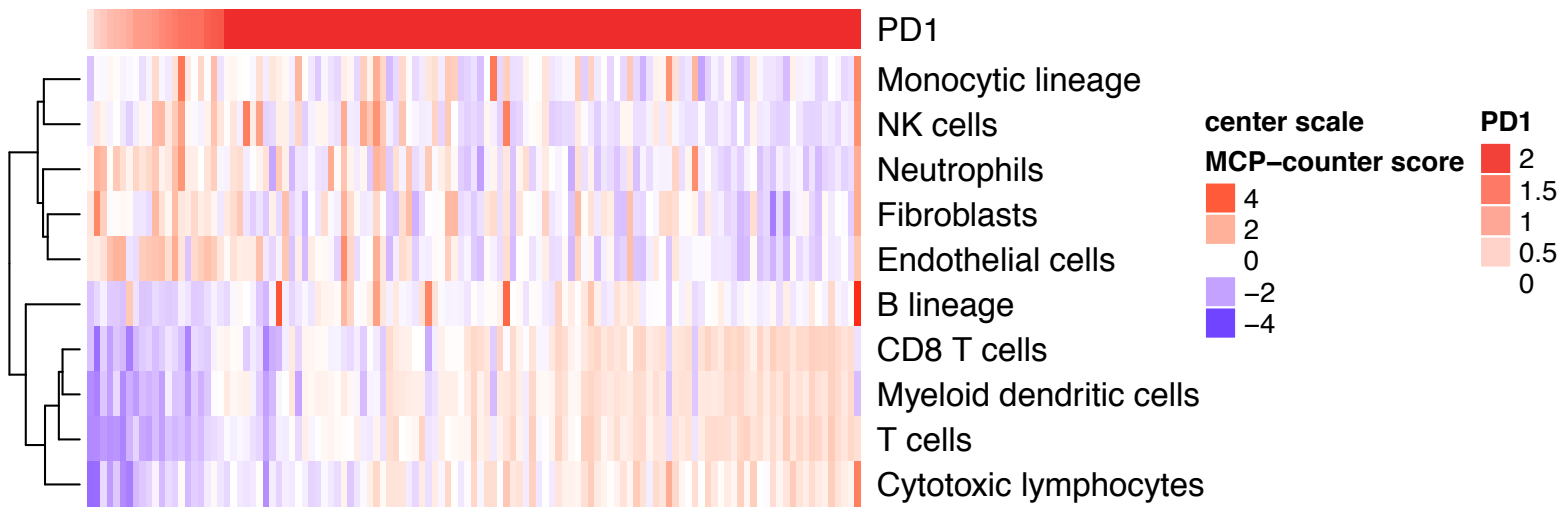

# UCEC

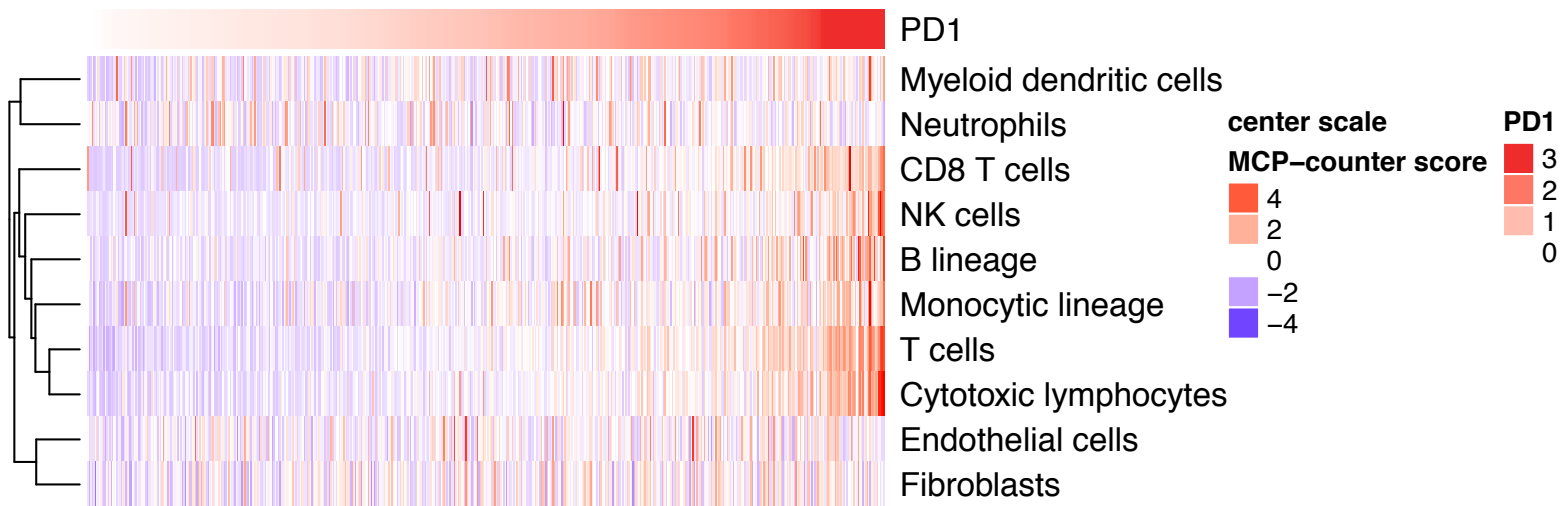

# UCS

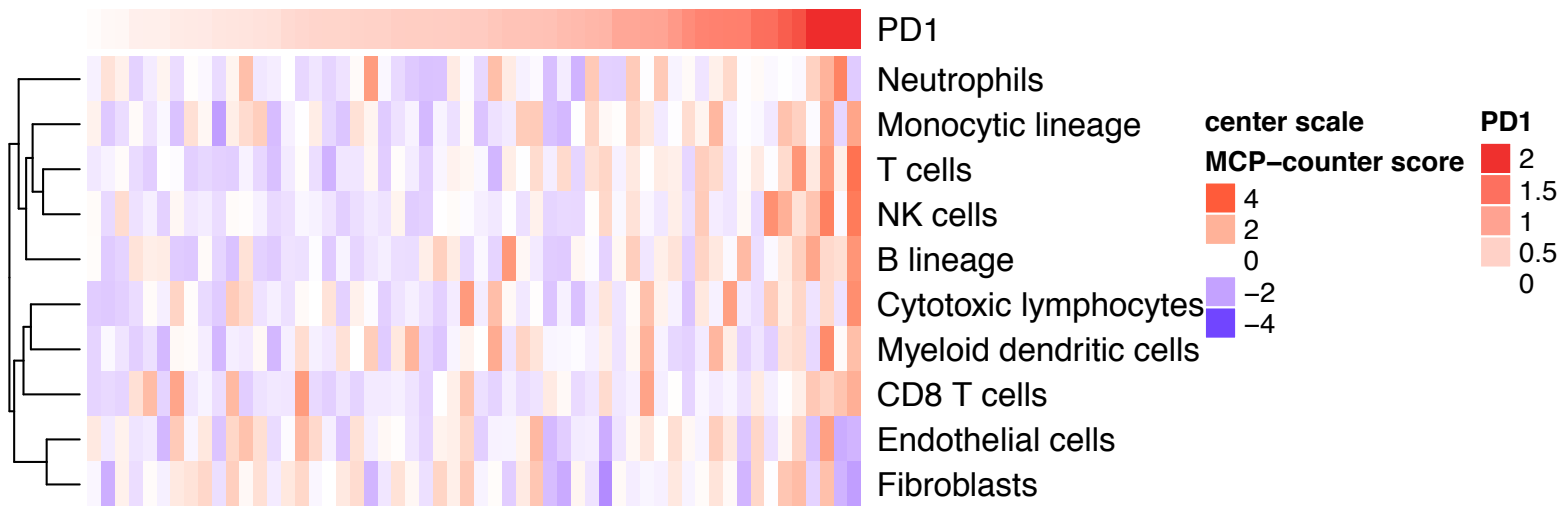



UVM

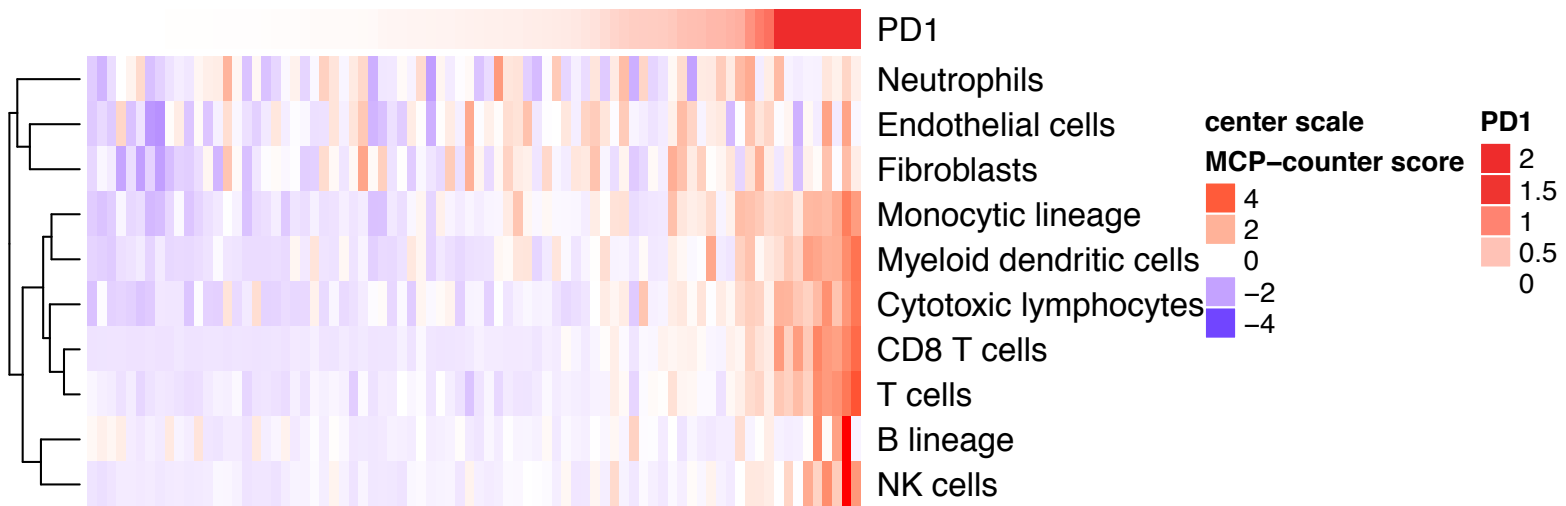

Supplement: MOESM1 [file 16359760]
