# Supplementary material for: Analysis of PD-1 related immune transcriptional profile in different cancer types
Source: Springer Nature journal article supplement (doi:10.1186/s12935-018-0712-y), 2018-12-01

Figure S2

ACC

PD1

PD1

1.5  
1  
0.5  
0

pathway\_type

- Antigen processing and presentation
- B cell receptor signaling pathway
- C-type lectin receptor signaling pathway
- Chemokine signaling pathway
- Complement and coagulation cascades
- Cytosolic DNA-sensing pathway
- Fc epsilon RI signaling pathway
- Fc gamma R-mediated phagocytosis
- Leukocyte transendothelial migration
- Natural killer cell mediated cytotoxicity
- NOD-like receptor signaling pathway
- T cell receptor signaling pathway
- Th1 and Th2 cell differentiation
- Th17 cell differentiation
- Toll-like receptor signaling pathway

expression

- 4
- 2
- 0
- 2
- 4

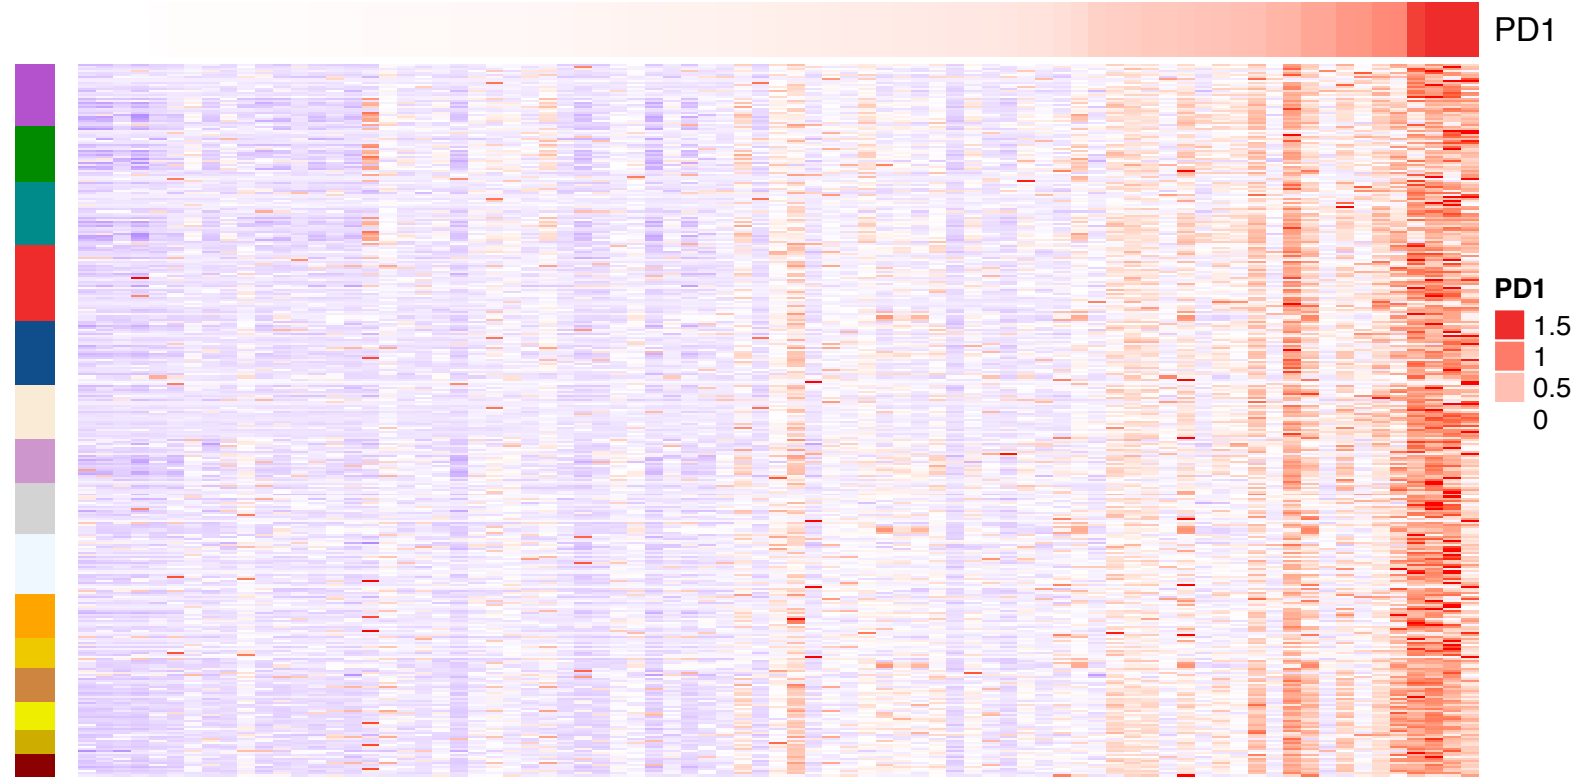

# BLCA

PD1

PD1

2  
1.5  
1  
0.5  
0

## pathway\_type

- Antigen processing and presentation
- B cell receptor signaling pathway
- C-type lectin receptor signaling pathway
- Chemokine signaling pathway
- Complement and coagulation cascades
- Cytosolic DNA-sensing pathway
- Fc gamma R-mediated phagocytosis
- Leukocyte transendothelial migration
- Natural killer cell mediated cytotoxicity
- NOD-like receptor signaling pathway
- T cell receptor signaling pathway
- Th1 and Th2 cell differentiation
- Th17 cell differentiation
- Toll-like receptor signaling pathway

## expression

- 4
- 2
- 0
- 2
- 4

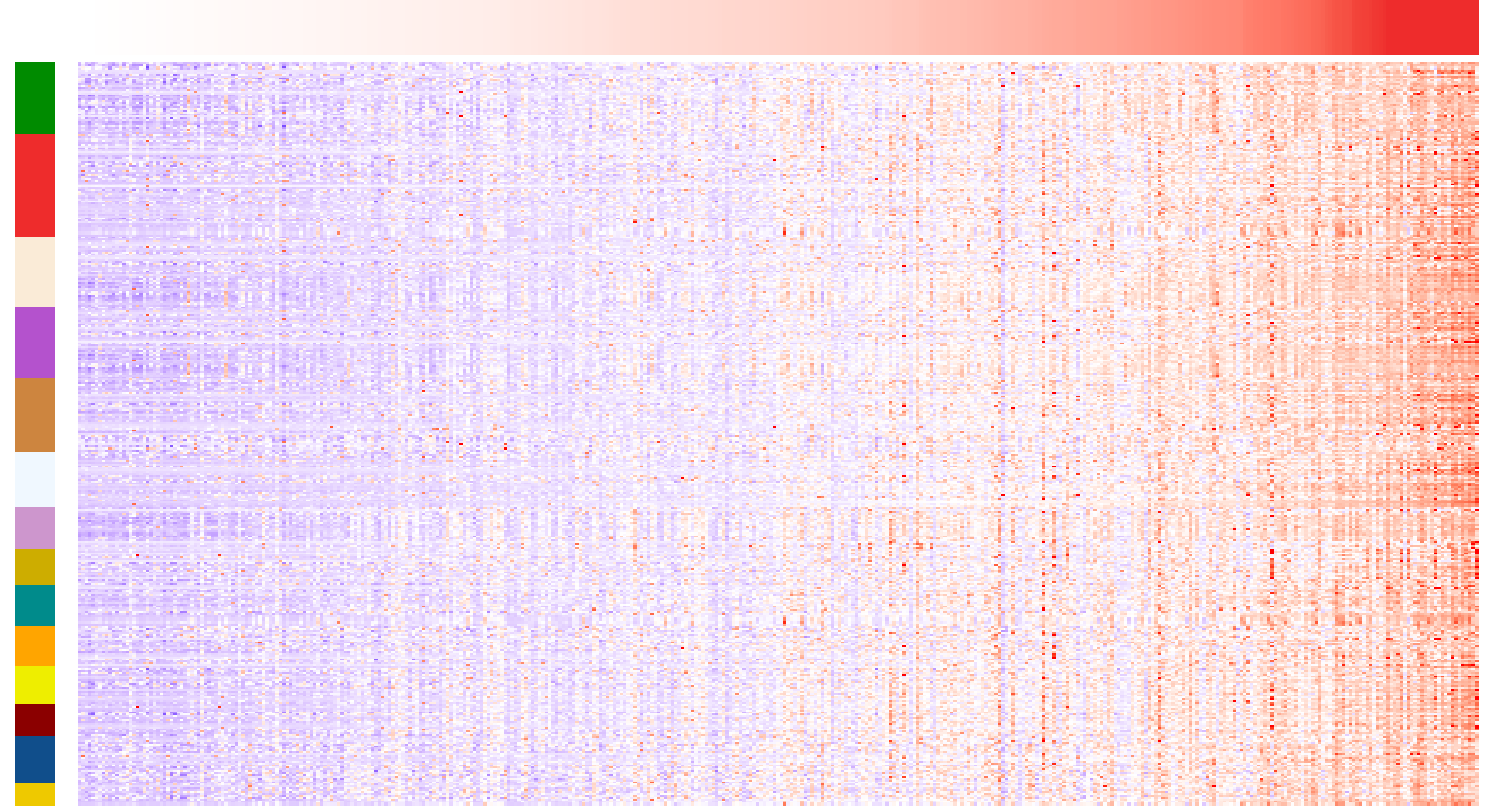

# BRCA

PD1

PD1

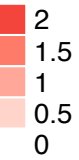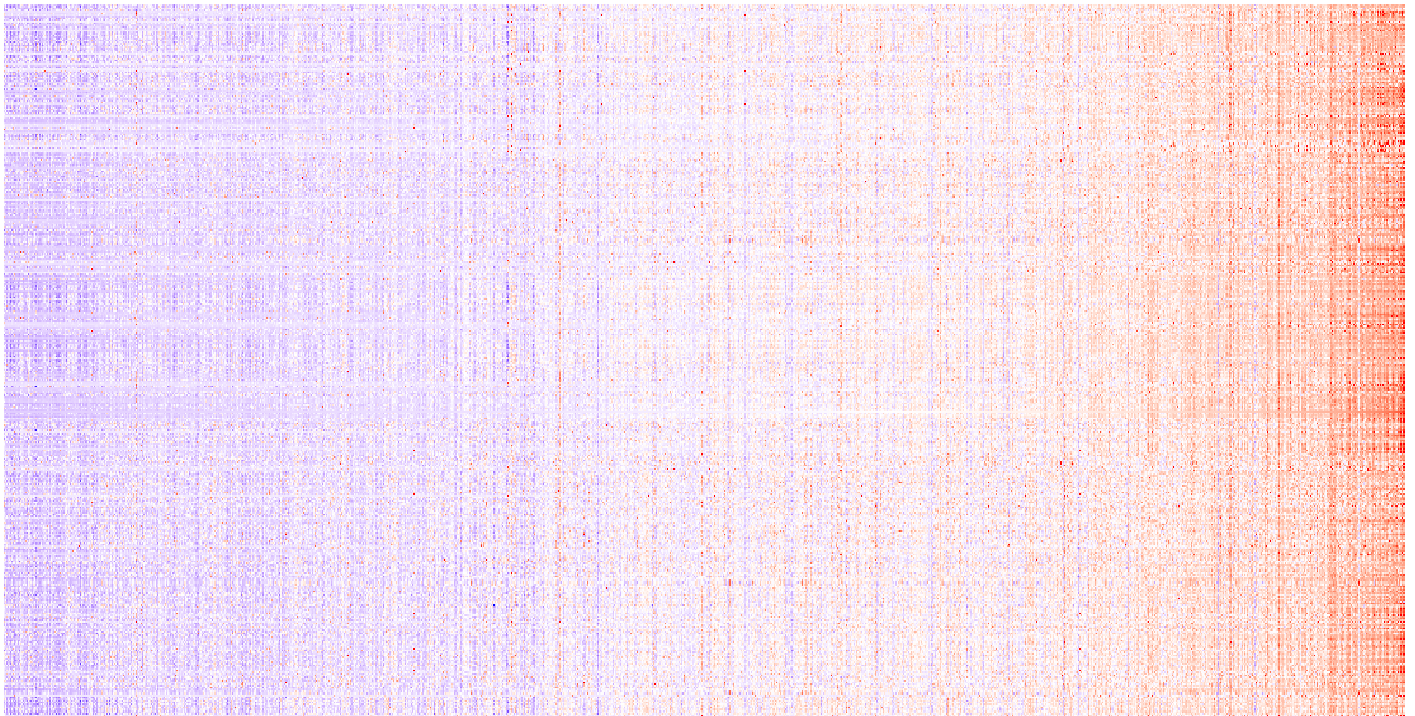

## pathway\_type

- Antigen processing and presentation
- B cell receptor signaling pathway
- C-type lectin receptor signaling pathway
- Chemokine signaling pathway
- Complement and coagulation cascades
- Cytosolic DNA-sensing pathway
- Fc epsilon RI signaling pathway
- Fc gamma R-mediated phagocytosis
- Leukocyte transendothelial migration
- Natural killer cell mediated cytotoxicity
- NOD-like receptor signaling pathway
- T cell receptor signaling pathway
- Th1 and Th2 cell differentiation
- Th17 cell differentiation
- Toll-like receptor signaling pathway

## expression

- 4
- 2
- 0
- -2
- -4

# CESC

PD1

PD1

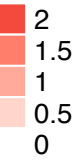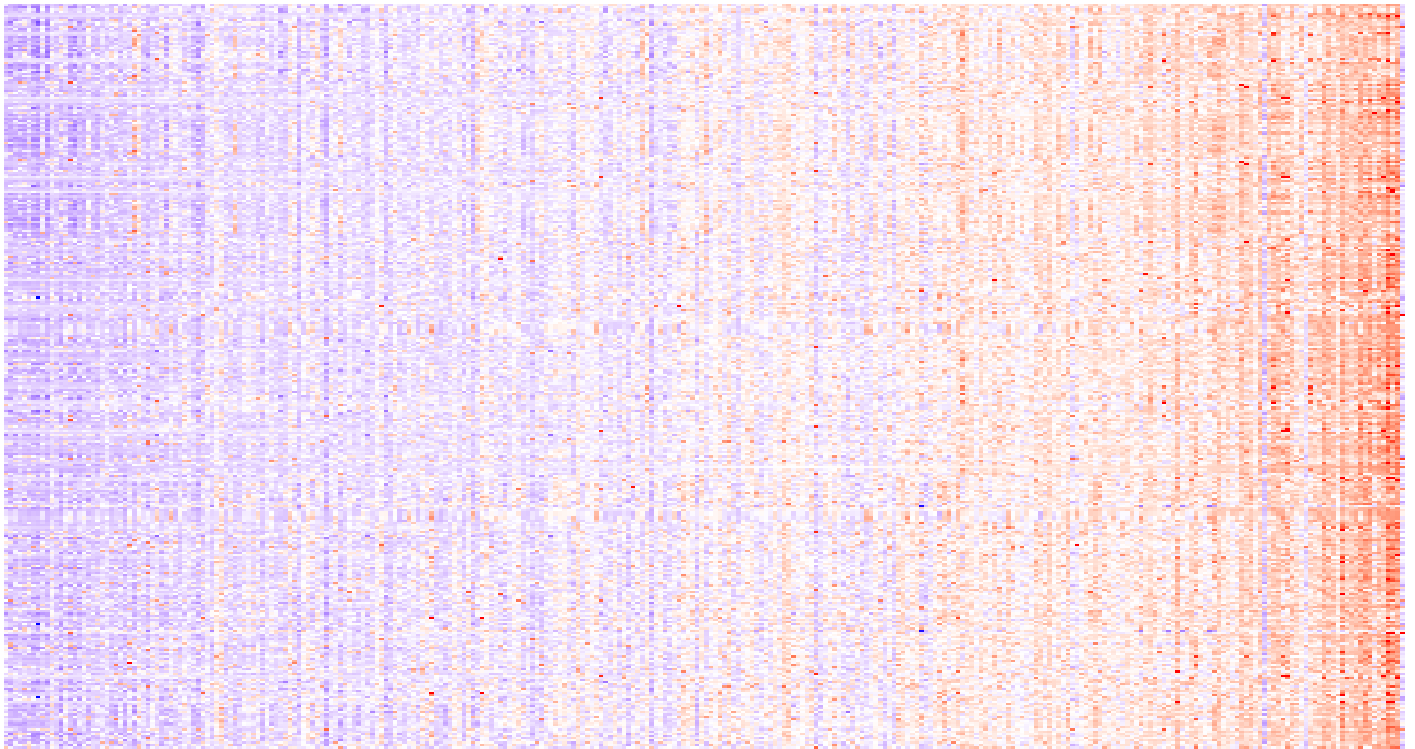

**pathway\_type**

- Antigen processing and presentation
- B cell receptor signaling pathway
- C-type lectin receptor signaling pathway
- Chemokine signaling pathway
- Complement and coagulation cascades
- Fc epsilon RI signaling pathway
- Fc gamma R-mediated phagocytosis
- Leukocyte transendothelial migration
- Natural killer cell mediated cytotoxicity
- NOD-like receptor signaling pathway
- T cell receptor signaling pathway
- Th1 and Th2 cell differentiation
- Th17 cell differentiation
- Toll-like receptor signaling pathway

**expression**

- 4
- 2
- 0
- 2
- 4

# CHOL

PD1

PD1

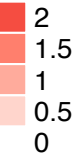

## pathway\_type

- Antigen processing and presentation
- B cell receptor signaling pathway
- C-type lectin receptor signaling pathway
- Chemokine signaling pathway
- Cytosolic DNA-sensing pathway
- Leukocyte transendothelial migration
- Natural killer cell mediated cytotoxicity
- NOD-like receptor signaling pathway
- T cell receptor signaling pathway
- Th1 and Th2 cell differentiation
- Th17 cell differentiation
- Toll-like receptor signaling pathway

## expression

- 4
- 2
- 0
- 2
- 4

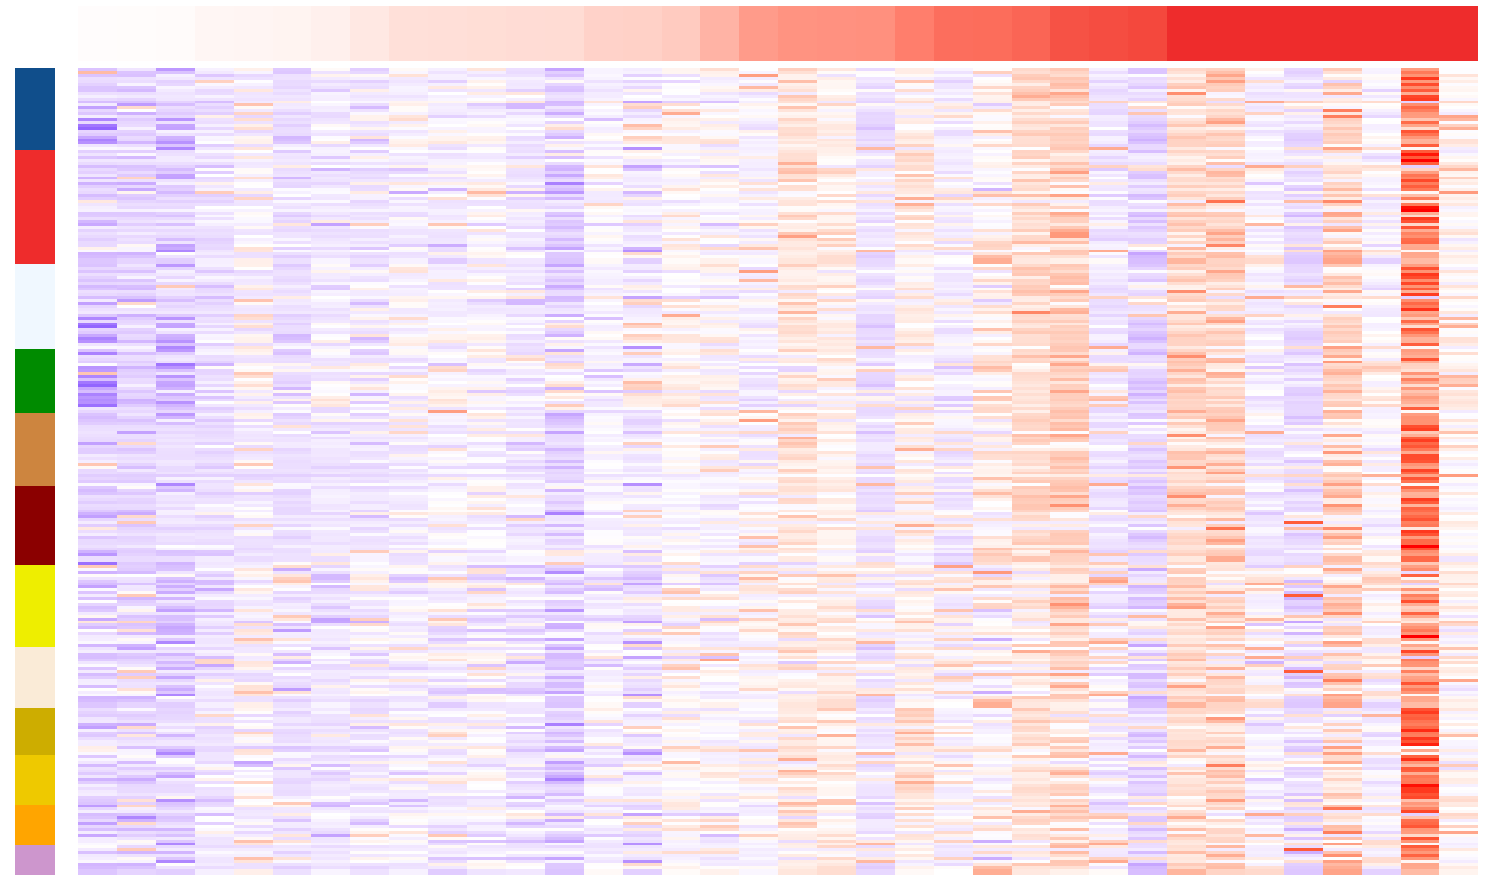

# COAD

PD1

PD1

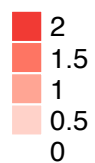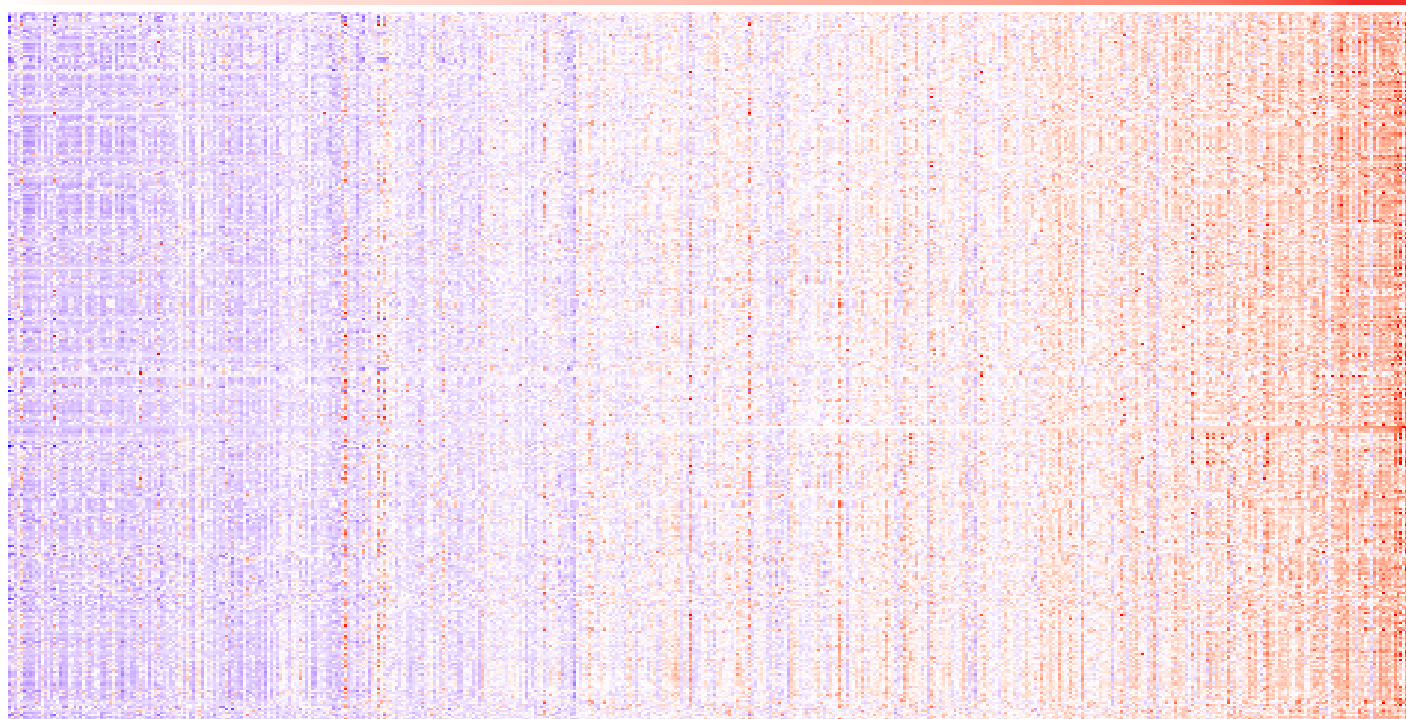

**pathway\_type**

- Antigen processing and presentation
- B cell receptor signaling pathway
- C-type lectin receptor signaling pathway
- Chemokine signaling pathway
- Complement and coagulation cascades
- Cytosolic DNA-sensing pathway
- Fc epsilon RI signaling pathway
- Fc gamma R-mediated phagocytosis
- Leukocyte transendothelial migration
- Natural killer cell mediated cytotoxicity
- NOD-like receptor signaling pathway
- T cell receptor signaling pathway
- Th1 and Th2 cell differentiation
- Th17 cell differentiation
- Toll-like receptor signaling pathway

**expression**

- 4
- 2
- 0
- 2
- 4

# DLBC

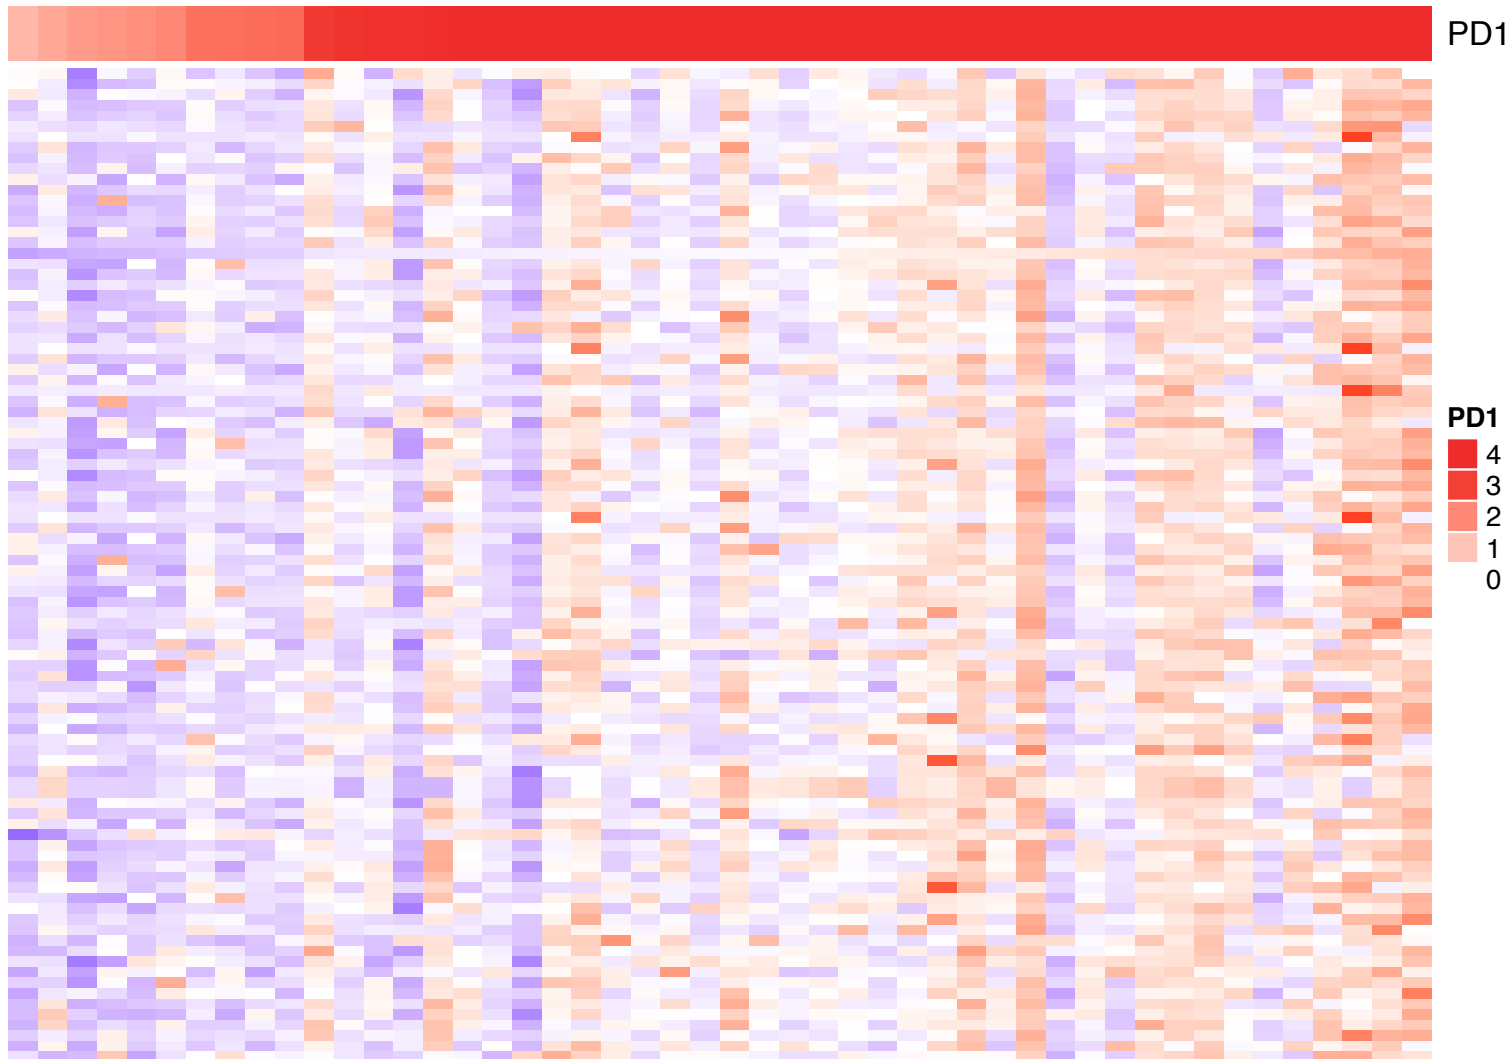

**pathway\_type**

- Chemokine signaling pathway
- Natural killer cell mediated cytotoxicity
- NOD-like receptor signaling pathway
- T cell receptor signaling pathway
- Th1 and Th2 cell differentiation
- Th17 cell differentiation

**expression**

- 4
- 2
- 0
- 2
- 4

# ESCA

PD1

PD1

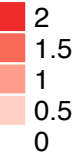

## pathway\_type

- Antigen processing and presentation
- B cell receptor signaling pathway
- C-type lectin receptor signaling pathway
- Chemokine signaling pathway
- Complement and coagulation cascades
- Fc gamma R-mediated phagocytosis
- Leukocyte transendothelial migration
- Natural killer cell mediated cytotoxicity
- NOD-like receptor signaling pathway
- T cell receptor signaling pathway
- Th1 and Th2 cell differentiation
- Th17 cell differentiation
- Toll-like receptor signaling pathway

## expression

- 4
- 2
- 0
- 2
- 4

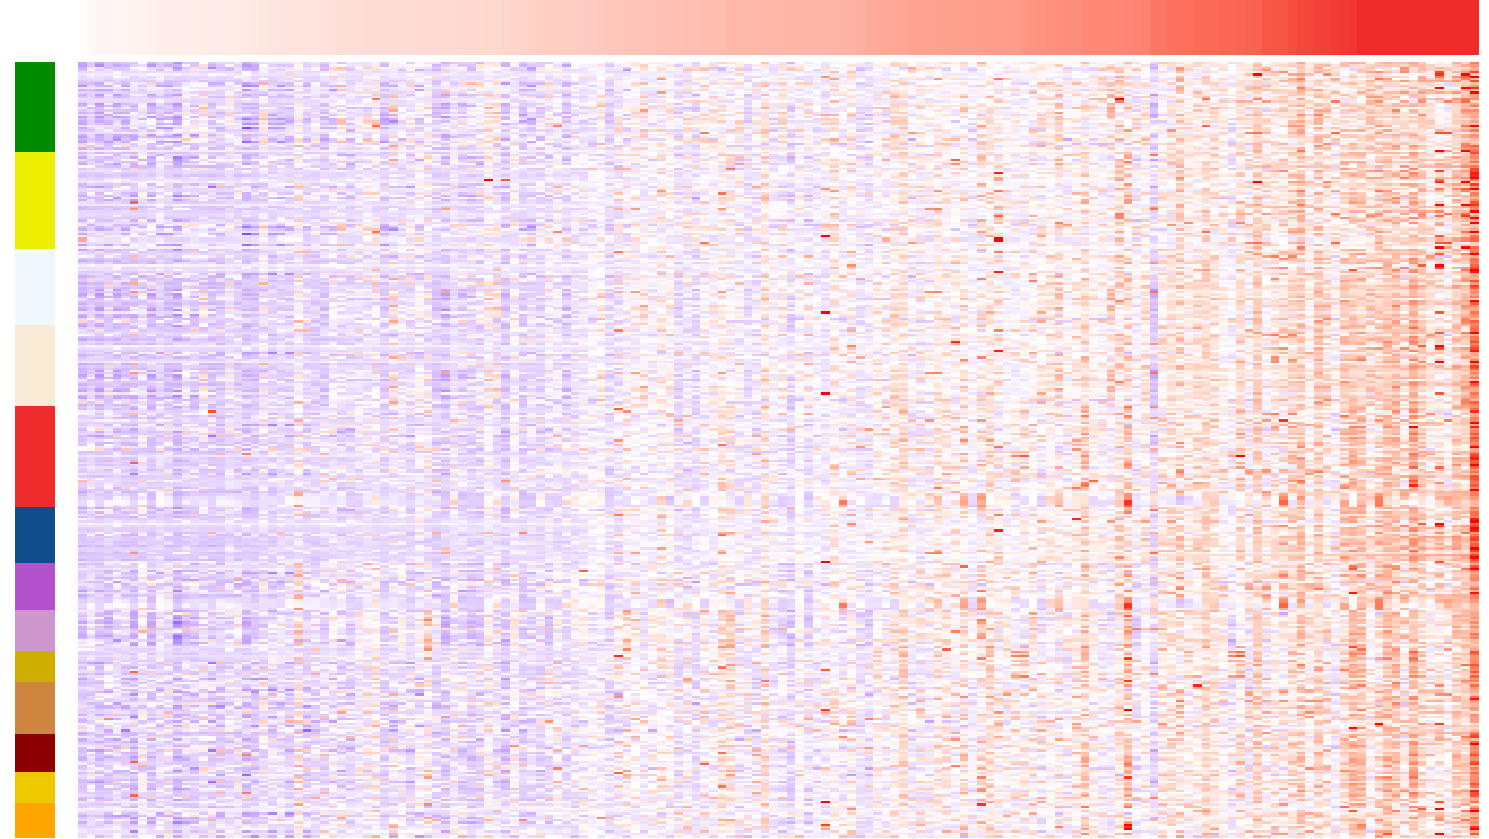



# GBM

PD1

PD1

0.8  
0.6  
0.4  
0.2  
0

## pathway\_type

- Antigen processing and presentation
- B cell receptor signaling pathway
- Chemokine signaling pathway
- Complement and coagulation cascades
- Cytosolic DNA-sensing pathway
- Fc epsilon RI signaling pathway
- Fc gamma R-mediated phagocytosis
- Leukocyte transendothelial migration
- Natural killer cell mediated cytotoxicity
- T cell receptor signaling pathway
- Th1 and Th2 cell differentiation
- Th17 cell differentiation
- Toll-like receptor signaling pathway

## expression

- 4
- 2
- 0
- 2
- 4

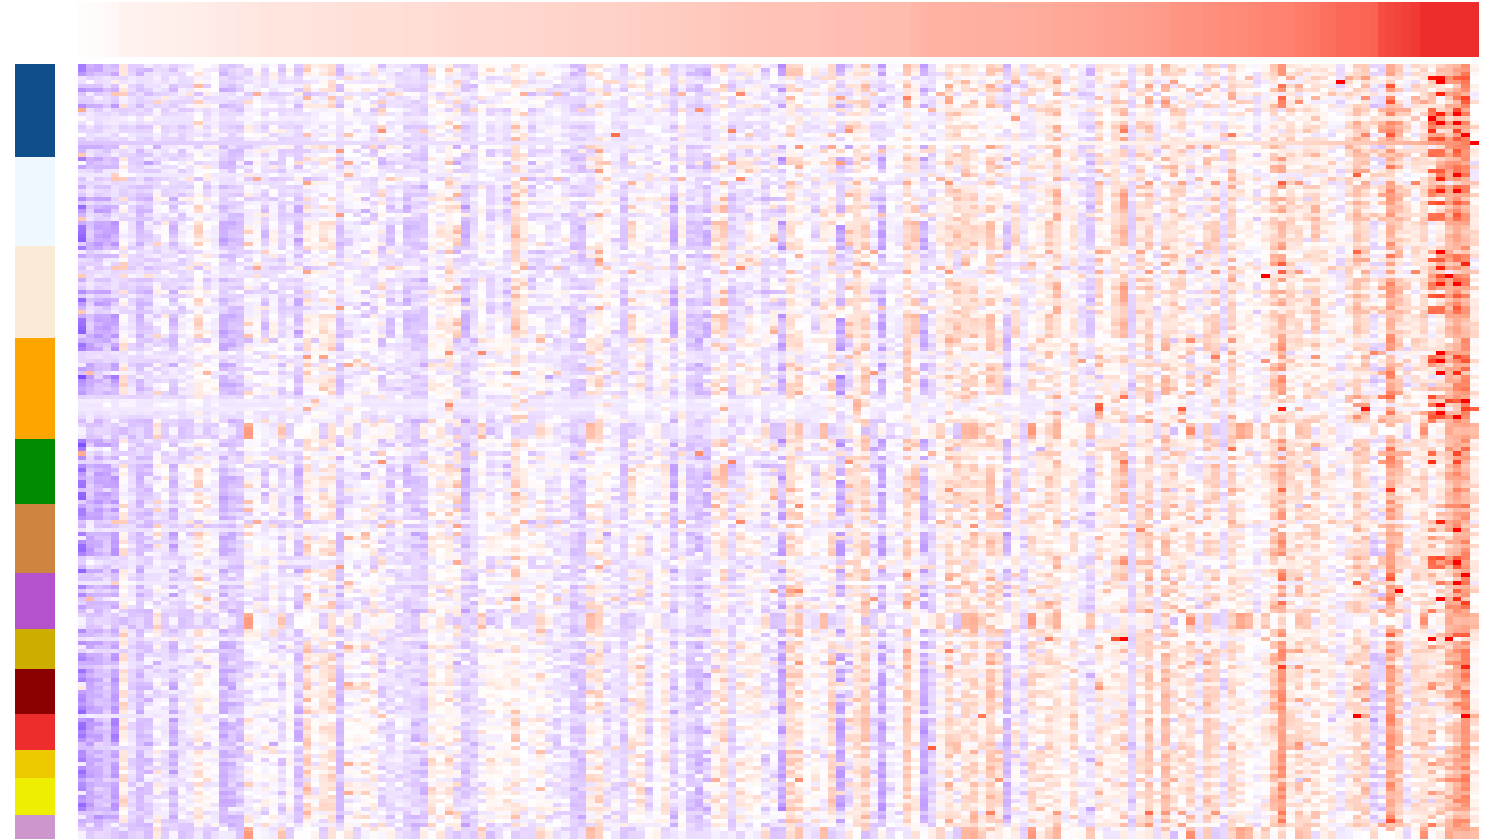

# HNSC

PD1

PD1

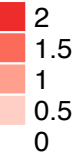

pathway\_type

- Antigen processing and presentation
- B cell receptor signaling pathway
- C-type lectin receptor signaling pathway
- Chemokine signaling pathway
- Complement and coagulation cascades
- Fc gamma R-mediated phagocytosis
- Leukocyte transendothelial migration
- Natural killer cell mediated cytotoxicity
- NOD-like receptor signaling pathway
- T cell receptor signaling pathway
- Th1 and Th2 cell differentiation
- Th17 cell differentiation
- Toll-like receptor signaling pathway

expression

- 4
- 2
- 0
- 2
- 4

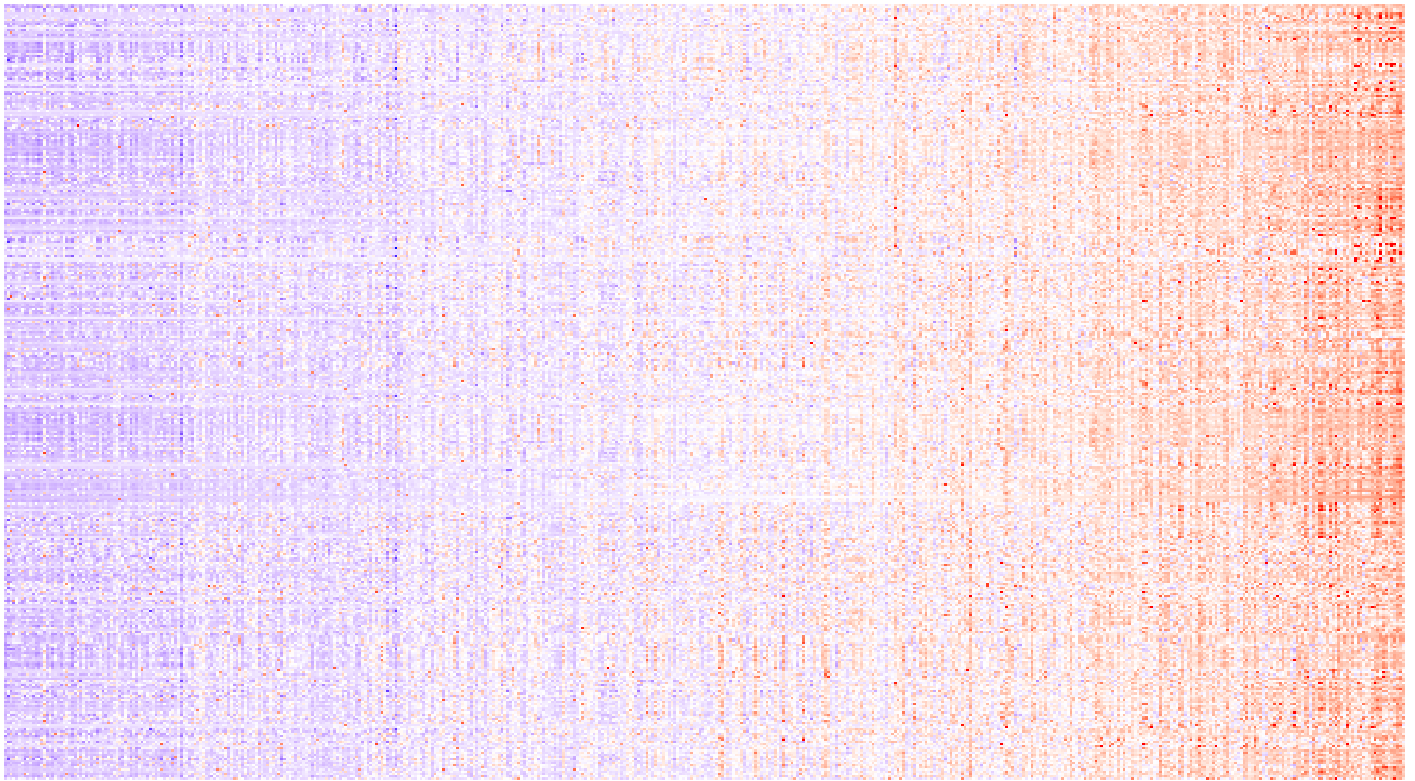

# KICH

PD1

PD1

0.8  
0.6  
0.4  
0.2  
0

## pathway\_type

- Antigen processing and presentation
- B cell receptor signaling pathway
- C-type lectin receptor signaling pathway
- Chemokine signaling pathway
- Complement and coagulation cascades
- Fc epsilon RI signaling pathway
- Fc gamma R-mediated phagocytosis
- IL-17 signaling pathway
- Leukocyte transendothelial migration
- Natural killer cell mediated cytotoxicity
- NOD-like receptor signaling pathway
- T cell receptor signaling pathway
- Th1 and Th2 cell differentiation
- Th17 cell differentiation
- Toll-like receptor signaling pathway

## expression

- 4
- 2
- 0
- 2
- 4

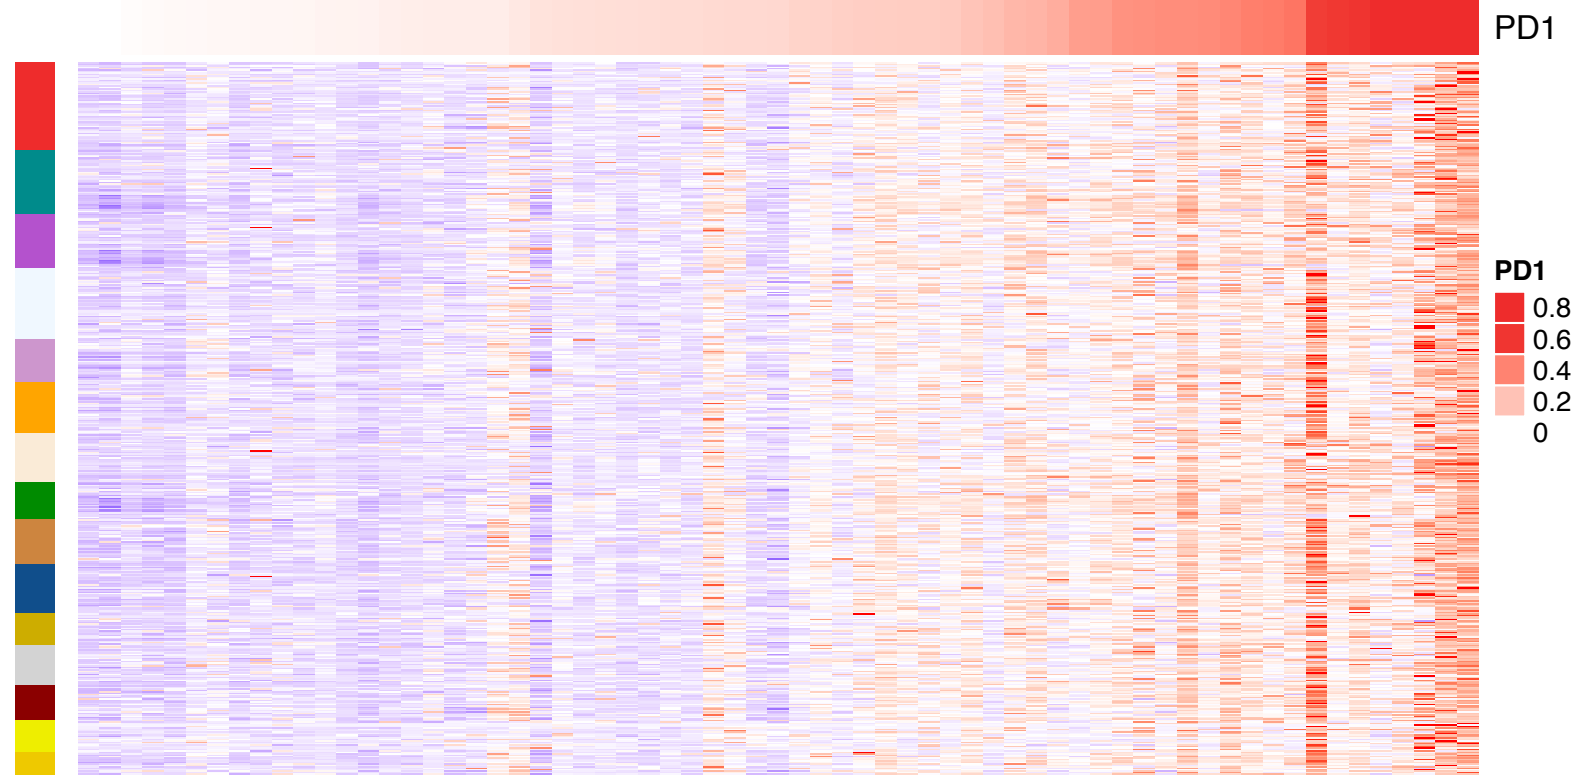

# KIRC

PD1

PD1  
3  
2  
1  
0

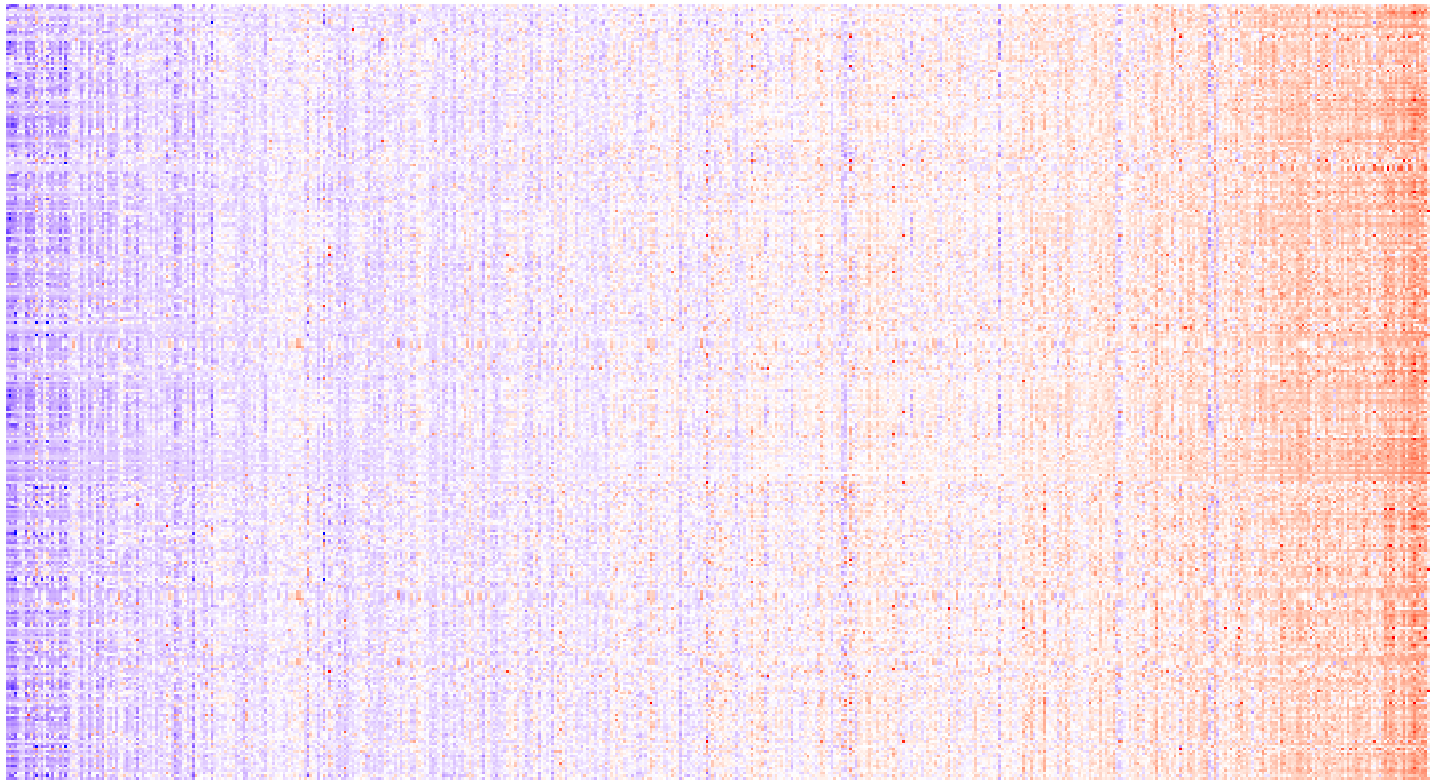

## pathway\_type

- Antigen processing and presentation
- B cell receptor signaling pathway
- C-type lectin receptor signaling pathway
- Chemokine signaling pathway
- Cytosolic DNA-sensing pathway
- Fc gamma R-mediated phagocytosis
- Leukocyte transendothelial migration
- Natural killer cell mediated cytotoxicity
- NOD-like receptor signaling pathway
- T cell receptor signaling pathway
- Th1 and Th2 cell differentiation
- Th17 cell differentiation
- Toll-like receptor signaling pathway

## expression

- 4
- 2
- 0
- 2
- 4

# KIRP

PD1

PD1

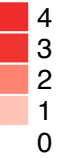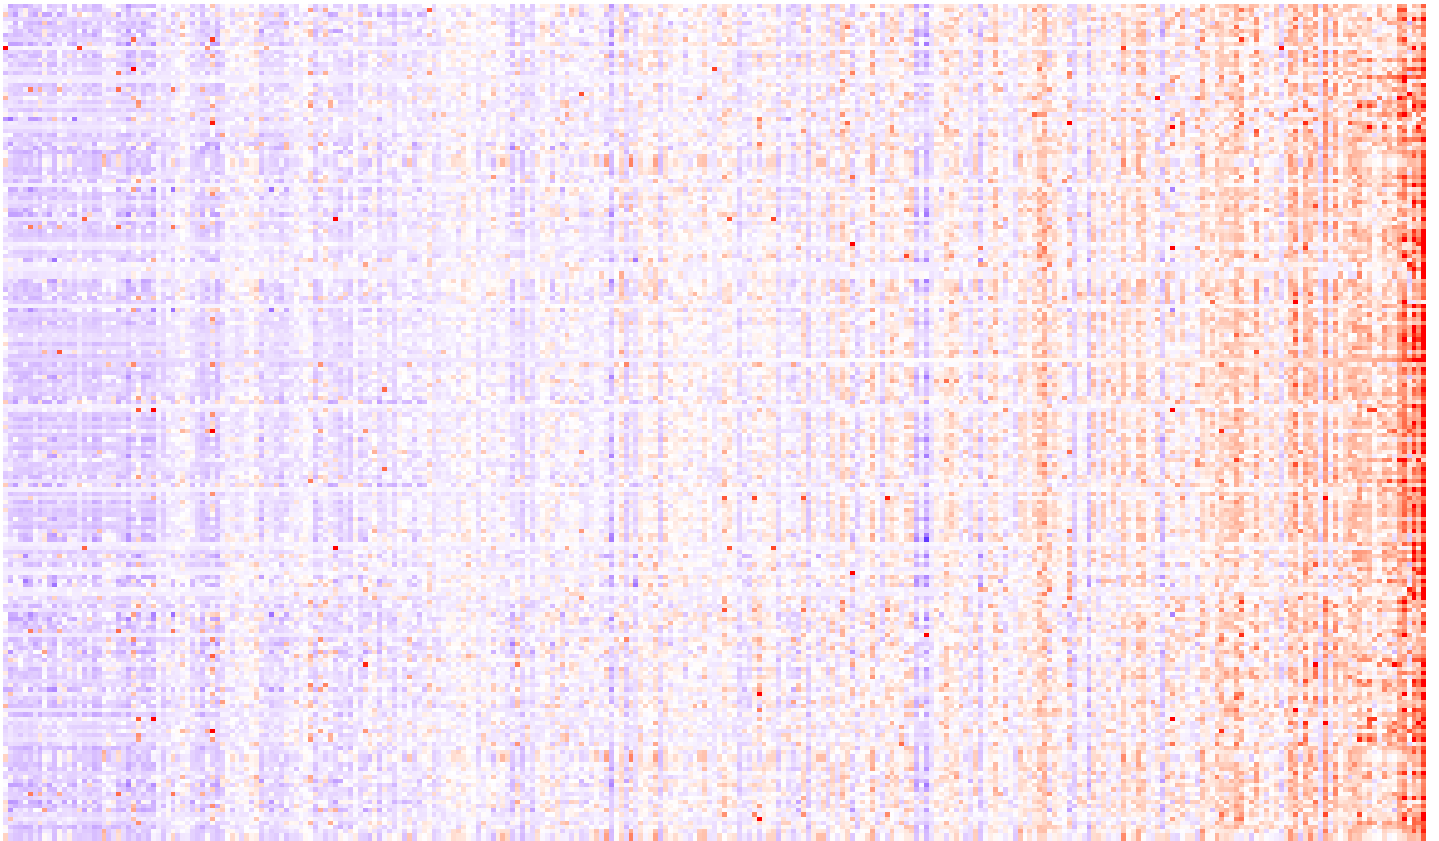

## pathway\_type

- Antigen processing and presentation
- B cell receptor signaling pathway
- Chemokine signaling pathway
- Cytosolic DNA-sensing pathway
- Leukocyte transendothelial migration
- Natural killer cell mediated cytotoxicity
- NOD-like receptor signaling pathway
- T cell receptor signaling pathway
- Th1 and Th2 cell differentiation
- Th17 cell differentiation
- Toll-like receptor signaling pathway

## expression

- 4
- 2
- 0
- 2
- 4

# LGG

PD1

PD1

1.5  
1  
0.5  
0

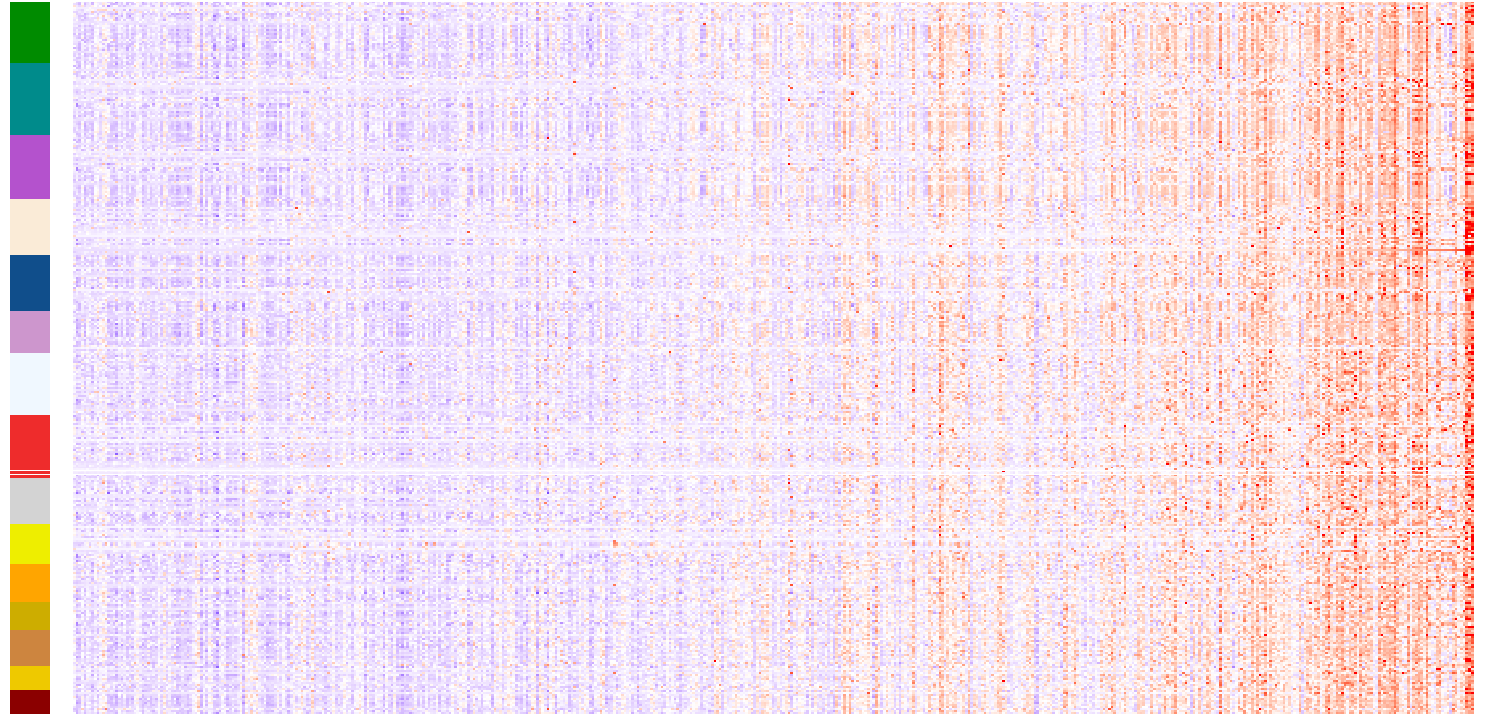

**pathway\_type**

- Antigen processing and presentation
- B cell receptor signaling pathway
- C-type lectin receptor signaling pathway
- Chemokine signaling pathway
- Complement and coagulation cascades
- Cytosolic DNA-sensing pathway
- Fc gamma R-mediated phagocytosis
- IL-17 signaling pathway
- Leukocyte transendothelial migration
- Natural killer cell mediated cytotoxicity
- NOD-like receptor signaling pathway
- T cell receptor signaling pathway
- Th1 and Th2 cell differentiation
- Th17 cell differentiation
- Toll-like receptor signaling pathway

**expression**

- 4
- 2
- 0
- -2
- -4

# LIHC

PD1

PD1  
3  
2  
1  
0

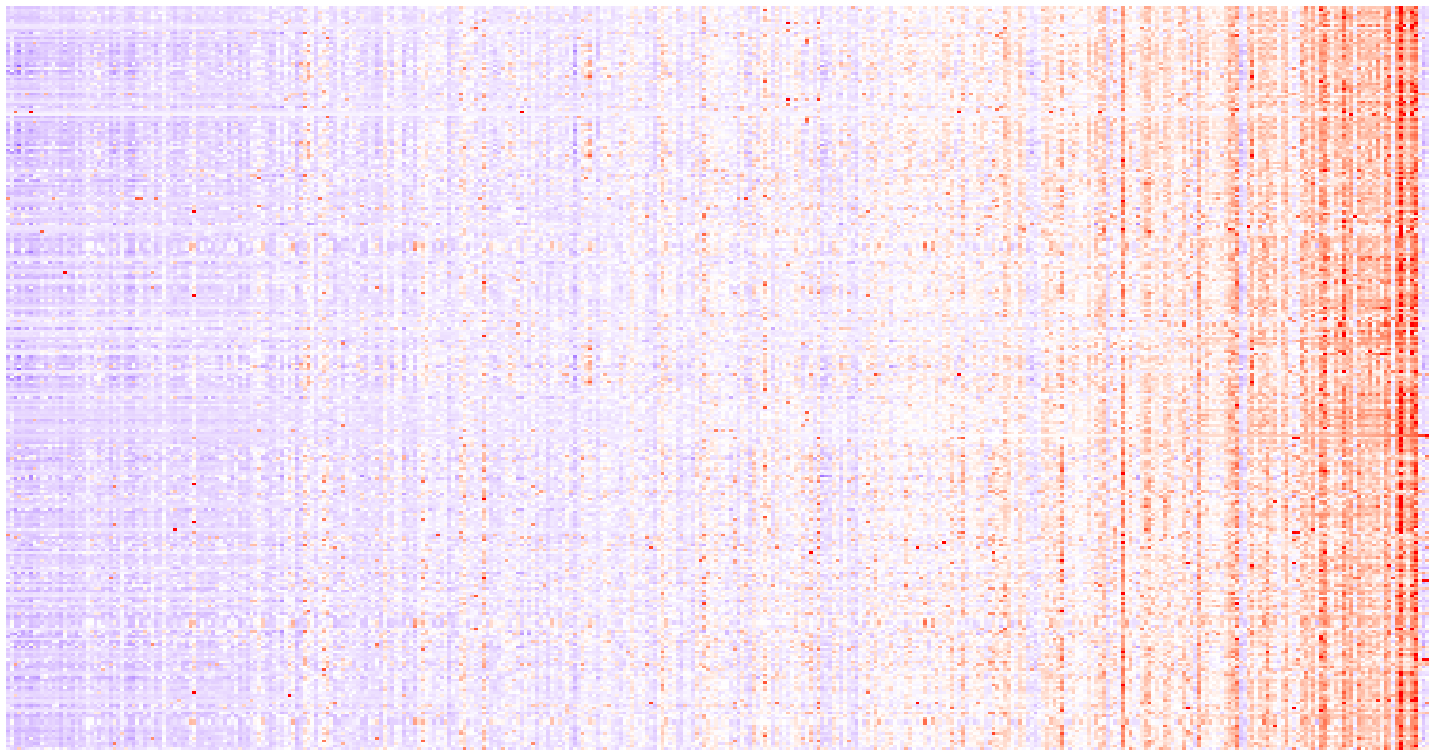

## pathway\_type

- Antigen processing and presentation
- B cell receptor signaling pathway
- C-type lectin receptor signaling pathway
- Chemokine signaling pathway
- Cytosolic DNA-sensing pathway
- Fc epsilon RI signaling pathway
- Fc gamma R-mediated phagocytosis
- Leukocyte transendothelial migration
- Natural killer cell mediated cytotoxicity
- NOD-like receptor signaling pathway
- T cell receptor signaling pathway
- Th1 and Th2 cell differentiation
- Th17 cell differentiation
- Toll-like receptor signaling pathway

## expression

- 4
- 2
- 0
- 2
- 4

# LUAD

PD1

PD1

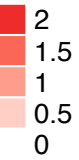

## pathway\_type

- Antigen processing and presentation
- B cell receptor signaling pathway
- C-type lectin receptor signaling pathway
- Chemokine signaling pathway
- Complement and coagulation cascades
- Cytosolic DNA-sensing pathway
- Fc epsilon RI signaling pathway
- Fc gamma R-mediated phagocytosis
- Leukocyte transendothelial migration
- Natural killer cell mediated cytotoxicity
- NOD-like receptor signaling pathway
- T cell receptor signaling pathway
- Th1 and Th2 cell differentiation
- Th17 cell differentiation
- Toll-like receptor signaling pathway

## expression

- 4
- 2
- 0
- -2
- -4

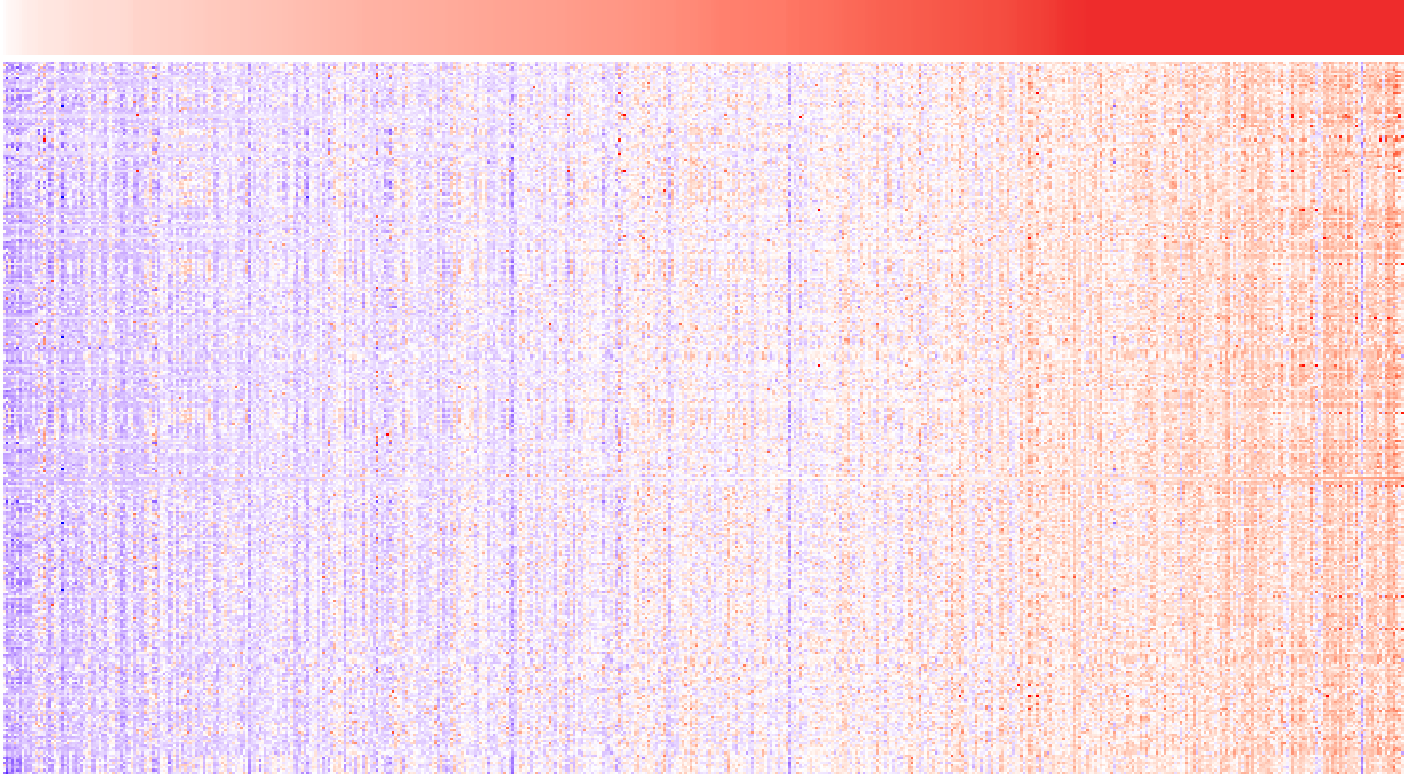



# LUSC

PD1

PD1

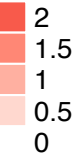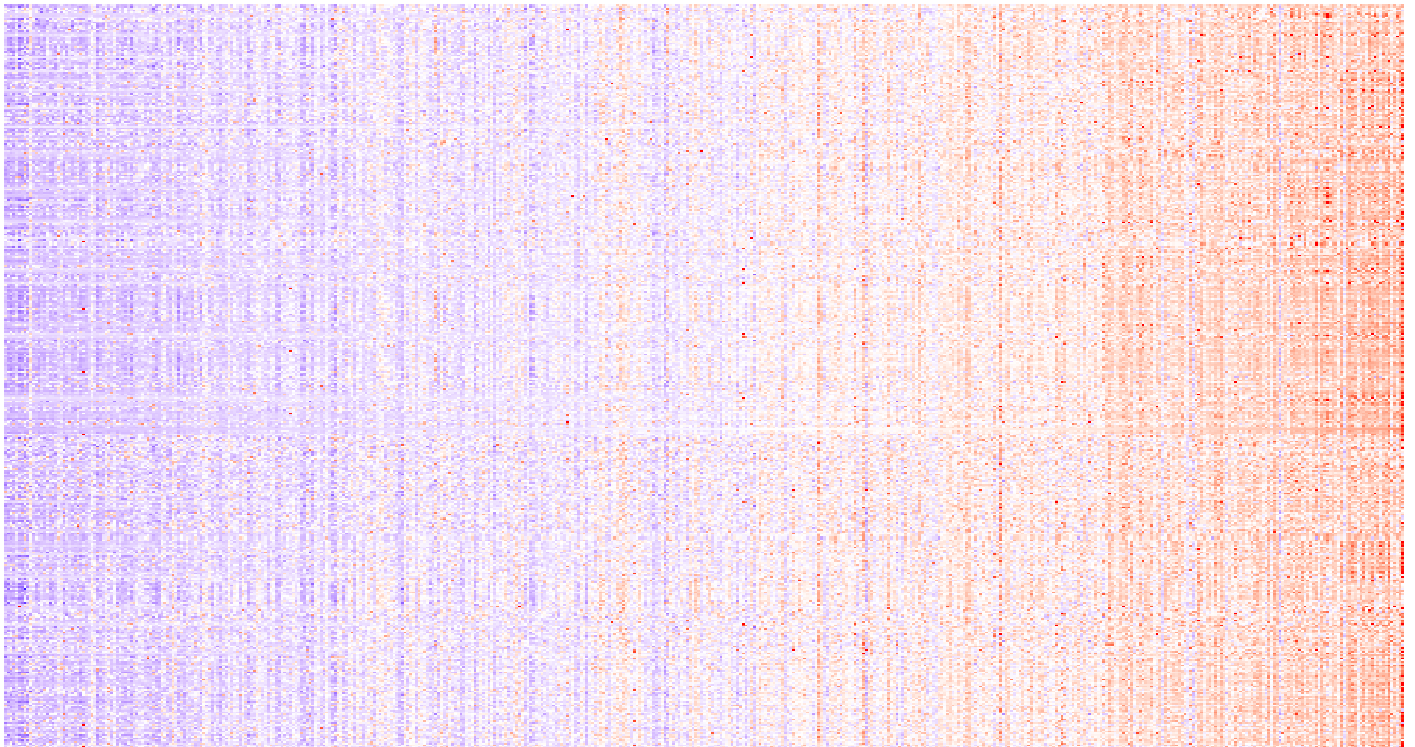

**pathway\_type**

- Antigen processing and presentation
- B cell receptor signaling pathway
- C-type lectin receptor signaling pathway
- Chemokine signaling pathway
- Complement and coagulation cascades
- Fc epsilon RI signaling pathway
- Fc gamma R-mediated phagocytosis
- Leukocyte transendothelial migration
- Natural killer cell mediated cytotoxicity
- NOD-like receptor signaling pathway
- T cell receptor signaling pathway
- Th1 and Th2 cell differentiation
- Th17 cell differentiation
- Toll-like receptor signaling pathway

**expression**

- 4
- 2
- 0
- 2
- 4

# MESO

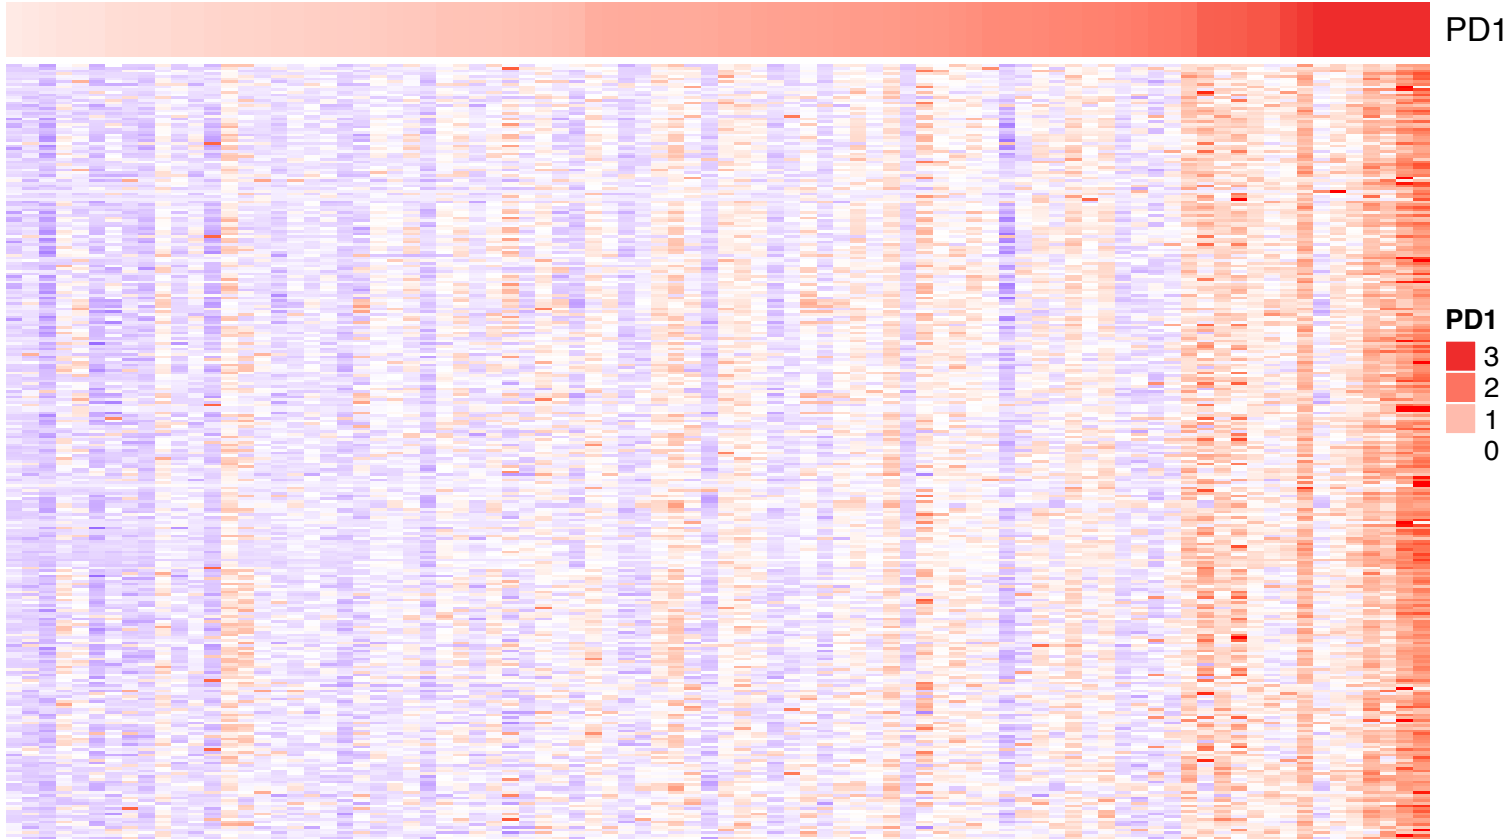

PD1

PD1

3  
2  
1  
0

## pathway\_type

- Antigen processing and presentation
- B cell receptor signaling pathway
- C-type lectin receptor signaling pathway
- Chemokine signaling pathway
- Fc epsilon RI signaling pathway
- Fc gamma R-mediated phagocytosis
- Leukocyte transendothelial migration
- Natural killer cell mediated cytotoxicity
- NOD-like receptor signaling pathway
- T cell receptor signaling pathway
- Th1 and Th2 cell differentiation
- Th17 cell differentiation
- Toll-like receptor signaling pathway

## expression

- 4
- 2
- 0
- 2
- 4

OV

PD1

PD1

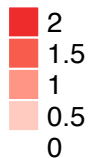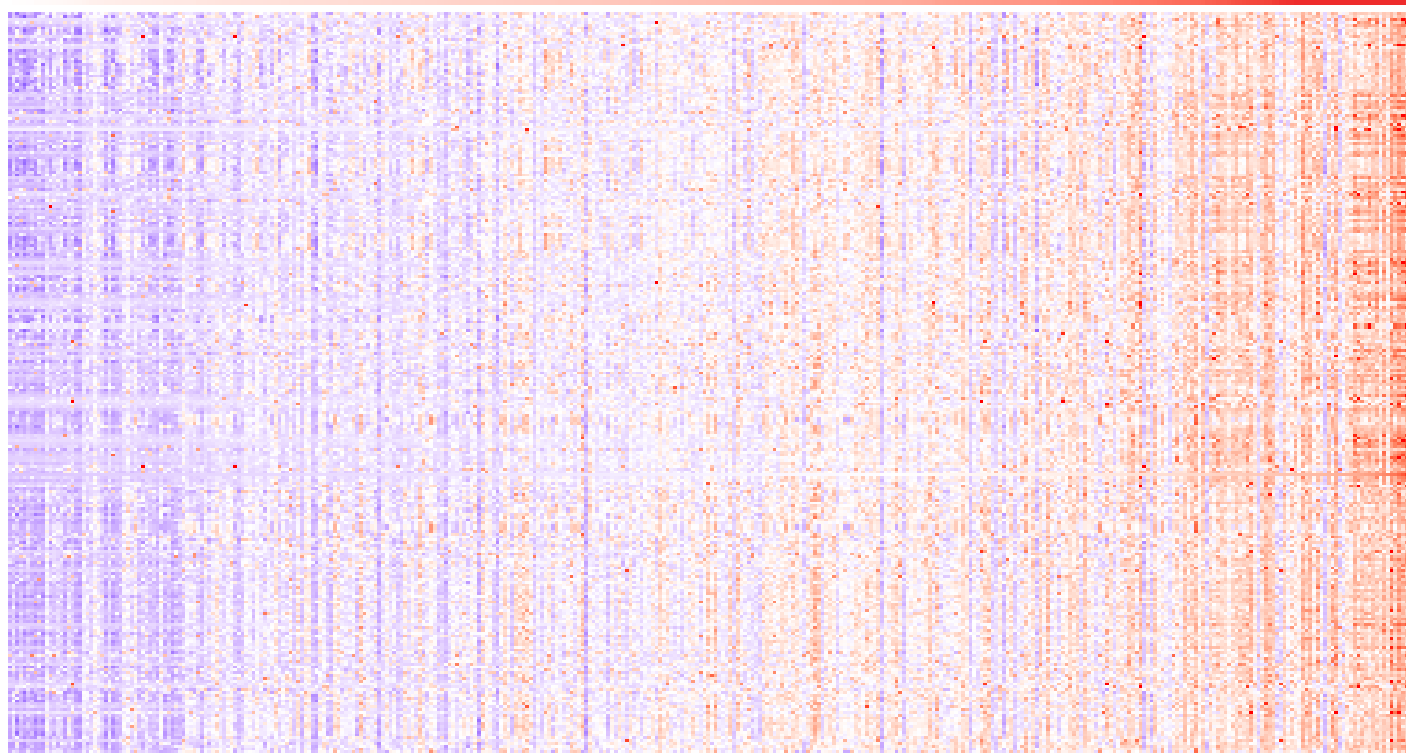

**pathway\_type**

- Antigen processing and presentation
- B cell receptor signaling pathway
- C-type lectin receptor signaling pathway
- Chemokine signaling pathway
- Complement and coagulation cascades
- Cytosolic DNA-sensing pathway
- Fc gamma R-mediated phagocytosis
- Leukocyte transendothelial migration
- Natural killer cell mediated cytotoxicity
- NOD-like receptor signaling pathway
- T cell receptor signaling pathway
- Th1 and Th2 cell differentiation
- Th17 cell differentiation
- Toll-like receptor signaling pathway

**expression**

- 4
- 2
- 0
- 2
- 4

# PAAD

PD1

PD1

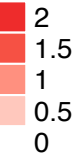

## pathway\_type

- Antigen processing and presentation
- B cell receptor signaling pathway
- C-type lectin receptor signaling pathway
- Chemokine signaling pathway
- Complement and coagulation cascades
- Fc epsilon RI signaling pathway
- Fc gamma R-mediated phagocytosis
- Leukocyte transendothelial migration
- Natural killer cell mediated cytotoxicity
- NOD-like receptor signaling pathway
- T cell receptor signaling pathway
- Th1 and Th2 cell differentiation
- Th17 cell differentiation
- Toll-like receptor signaling pathway

## expression

- 4
- 2
- 0
- -2
- -4

# PCPG

PD1

PD1

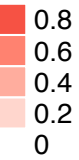

## pathway\_type

- Antigen processing and presentation
- B cell receptor signaling pathway
- C-type lectin receptor signaling pathway
- Chemokine signaling pathway
- Complement and coagulation cascades
- Cytosolic DNA-sensing pathway
- Fc gamma R-mediated phagocytosis
- IL-17 signaling pathway
- Leukocyte transendothelial migration
- Natural killer cell mediated cytotoxicity
- NOD-like receptor signaling pathway
- T cell receptor signaling pathway
- Th1 and Th2 cell differentiation
- Th17 cell differentiation
- Toll-like receptor signaling pathway

## expression

- 4
- 2
- 0
- 2
- 4

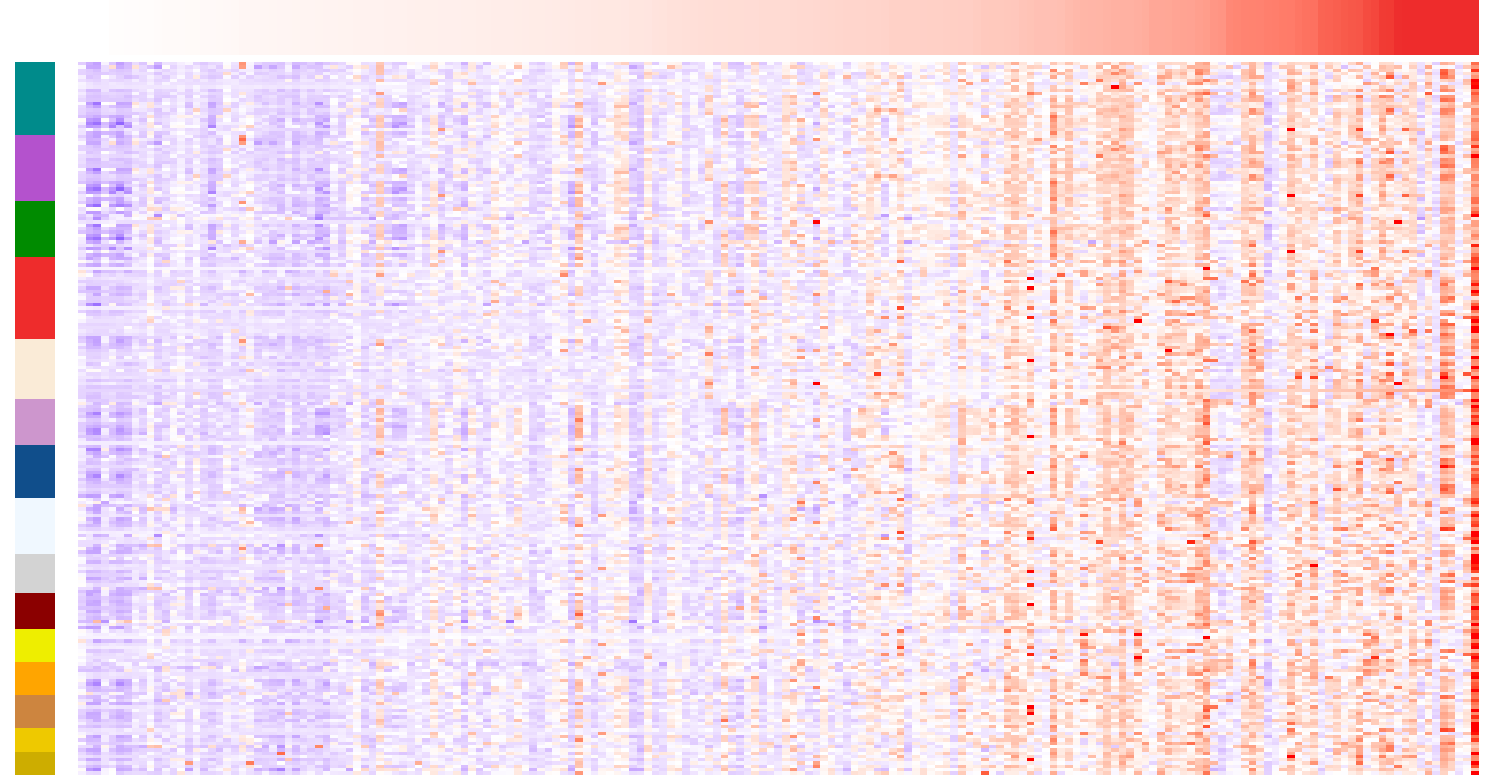

# PRAD

PD1

PD1

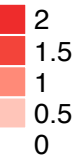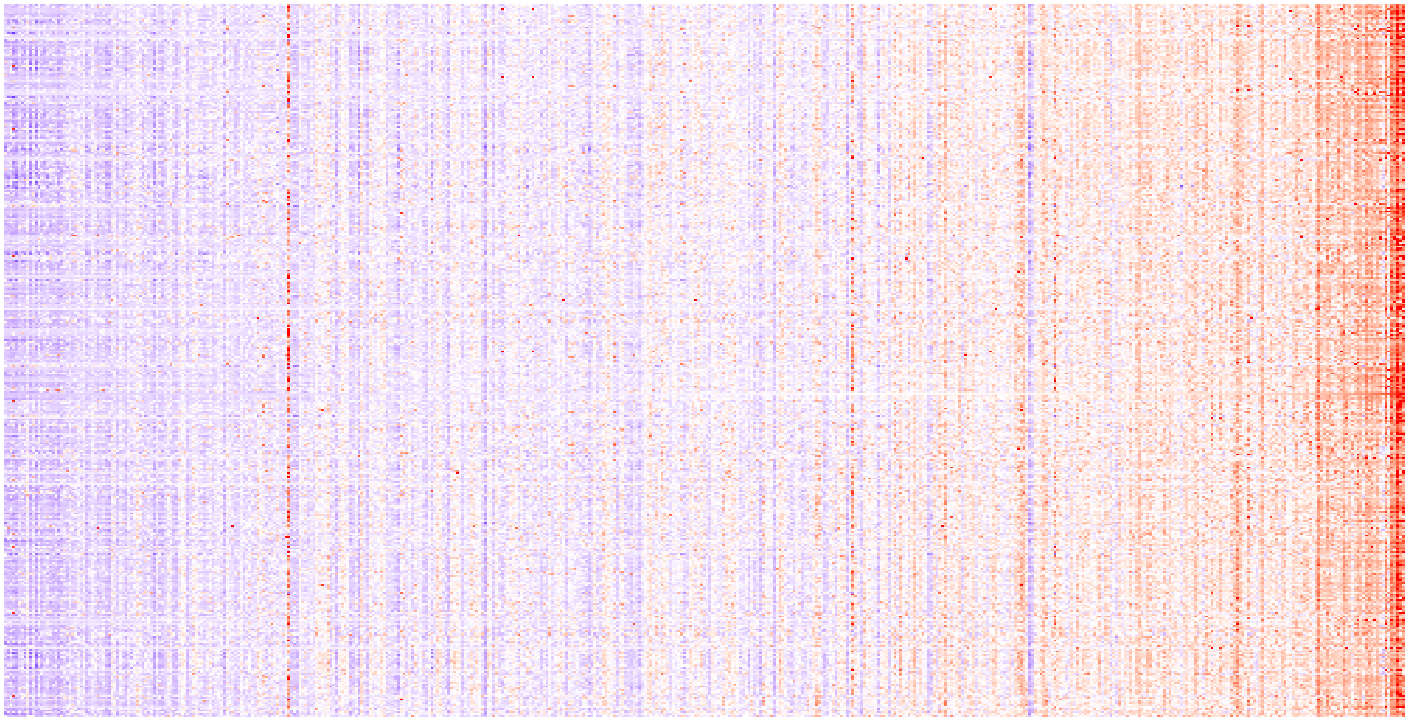

## pathway\_type

- Antigen processing and presentation
- B cell receptor signaling pathway
- C-type lectin receptor signaling pathway
- Chemokine signaling pathway
- Complement and coagulation cascades
- Cytosolic DNA-sensing pathway
- Fc epsilon RI signaling pathway
- Fc gamma R-mediated phagocytosis
- Leukocyte transendothelial migration
- Natural killer cell mediated cytotoxicity
- NOD-like receptor signaling pathway
- T cell receptor signaling pathway
- Th1 and Th2 cell differentiation
- Th17 cell differentiation
- Toll-like receptor signaling pathway

## expression

- 4
- 2
- 0
- -2
- -4

# READ

PD1

PD1

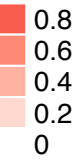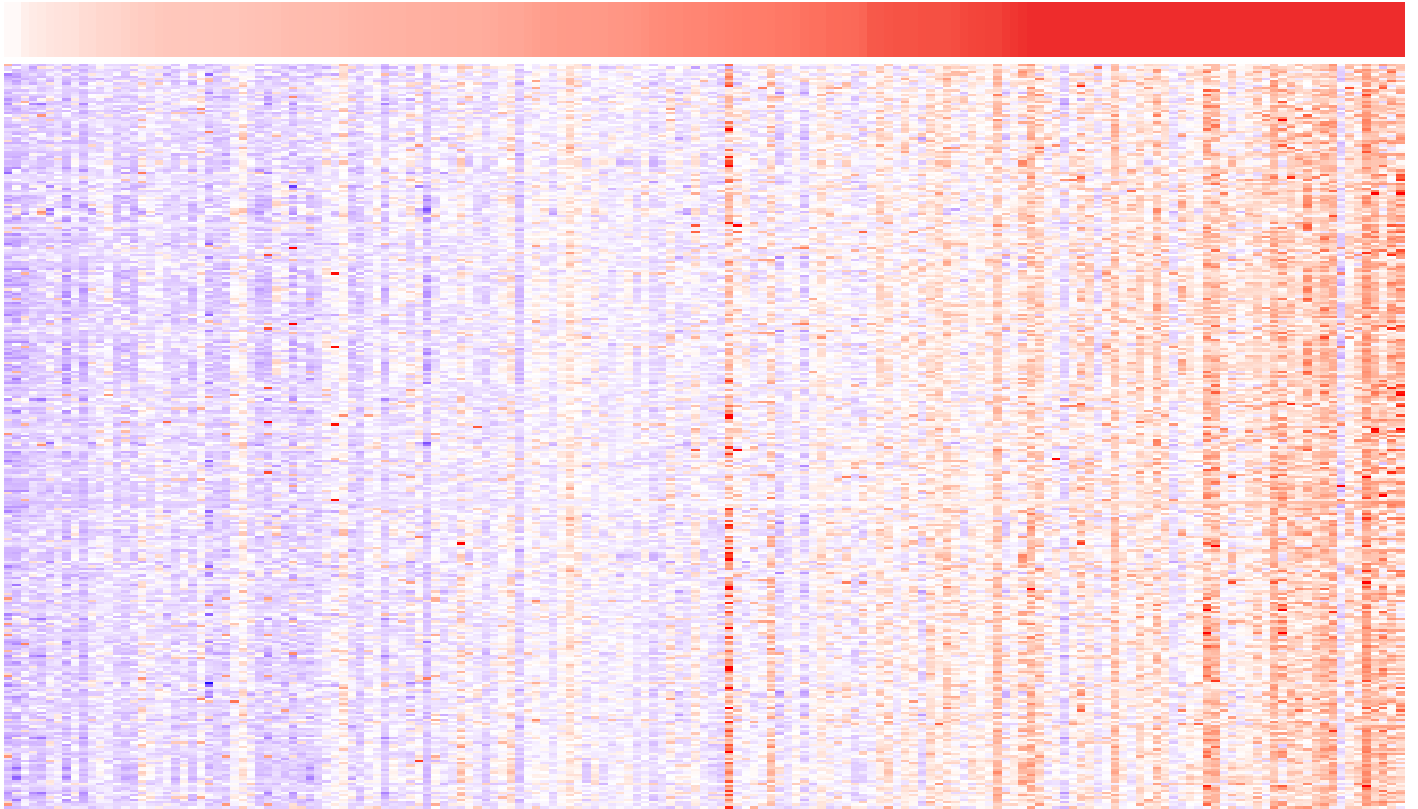

## pathway\_type

- Antigen processing and presentation
- B cell receptor signaling pathway
- C-type lectin receptor signaling pathway
- Chemokine signaling pathway
- Complement and coagulation cascades
- Fc epsilon RI signaling pathway
- Fc gamma R-mediated phagocytosis
- Leukocyte transendothelial migration
- Natural killer cell mediated cytotoxicity
- NOD-like receptor signaling pathway
- T cell receptor signaling pathway
- Th1 and Th2 cell differentiation
- Th17 cell differentiation
- Toll-like receptor signaling pathway

## expression

- 4
- 2
- 0
- 2
- 4

# SARC

PD1

PD1

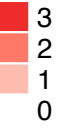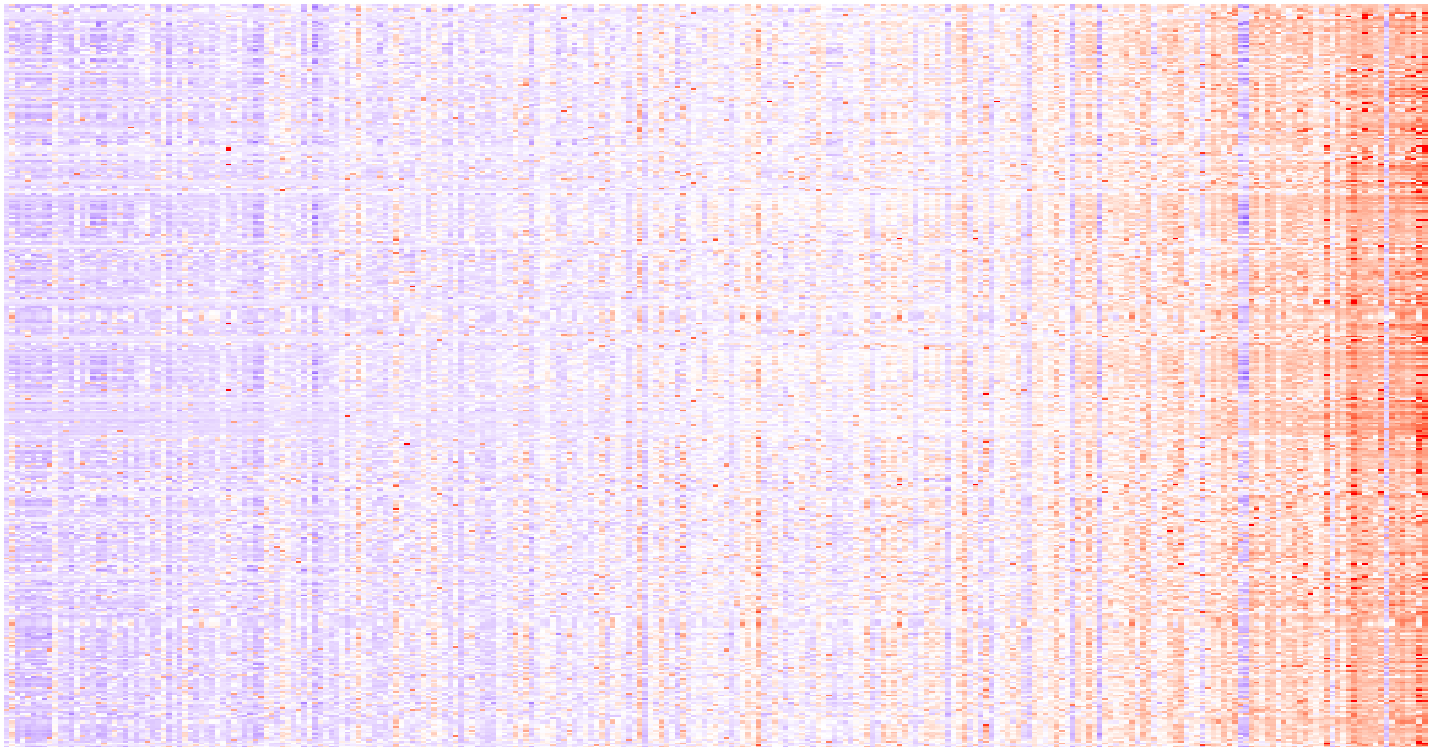

**pathway\_type**

- Antigen processing and presentation
- B cell receptor signaling pathway
- C-type lectin receptor signaling pathway
- Chemokine signaling pathway
- Cytosolic DNA-sensing pathway
- Fc epsilon RI signaling pathway
- Fc gamma R-mediated phagocytosis
- Leukocyte transendothelial migration
- Natural killer cell mediated cytotoxicity
- NOD-like receptor signaling pathway
- T cell receptor signaling pathway
- Th1 and Th2 cell differentiation
- Th17 cell differentiation
- Toll-like receptor signaling pathway

**expression**

- 4
- 2
- 0
- -2
- -4



# SKCM

PD1

PD1

3  
2  
1  
0

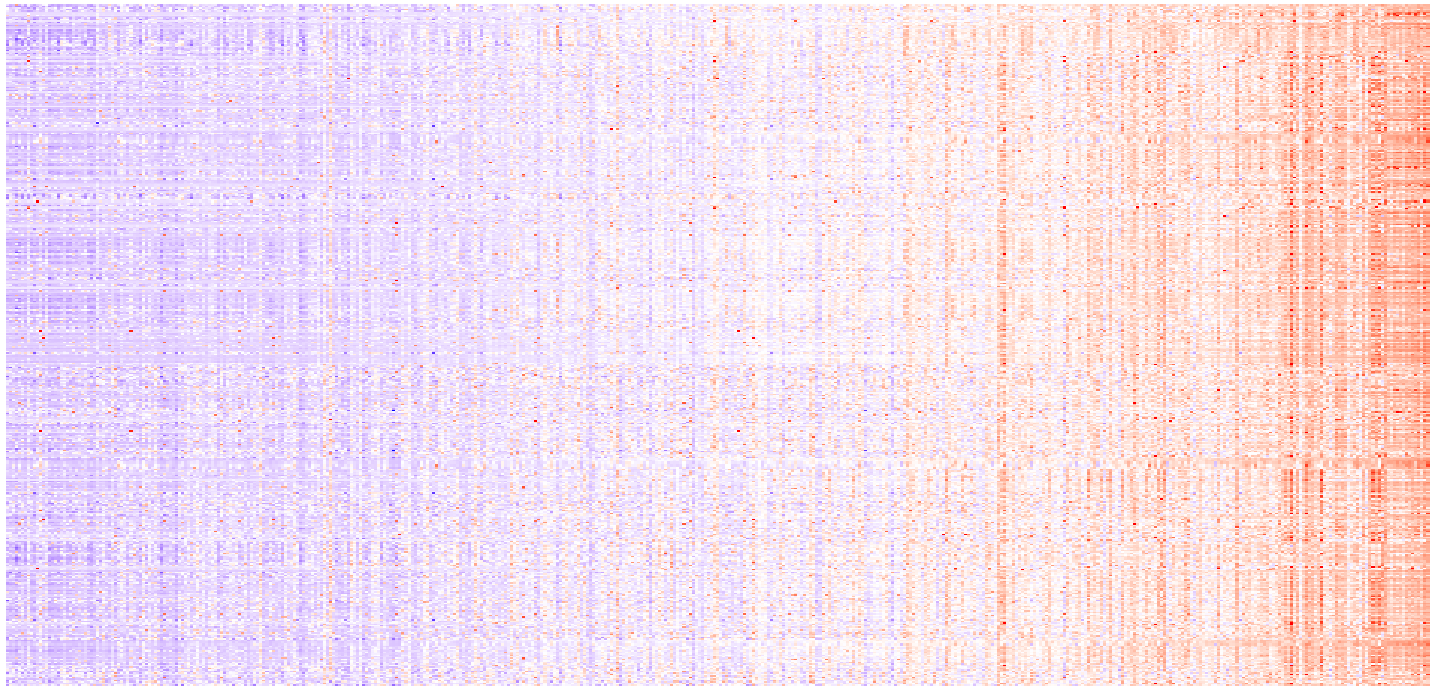

**pathway\_type**

- Antigen processing and presentation
- B cell receptor signaling pathway
- C-type lectin receptor signaling pathway
- Chemokine signaling pathway
- Complement and coagulation cascades
- Cytosolic DNA-sensing pathway
- Fc epsilon RI signaling pathway
- Fc gamma R-mediated phagocytosis
- Leukocyte transendothelial migration
- Natural killer cell mediated cytotoxicity
- NOD-like receptor signaling pathway
- RIG-I-like receptor signaling pathway
- T cell receptor signaling pathway
- Th1 and Th2 cell differentiation
- Th17 cell differentiation
- Toll-like receptor signaling pathway

**expression**

- 4
- 2
- 0
- 2
- 4

# STAD

PD1

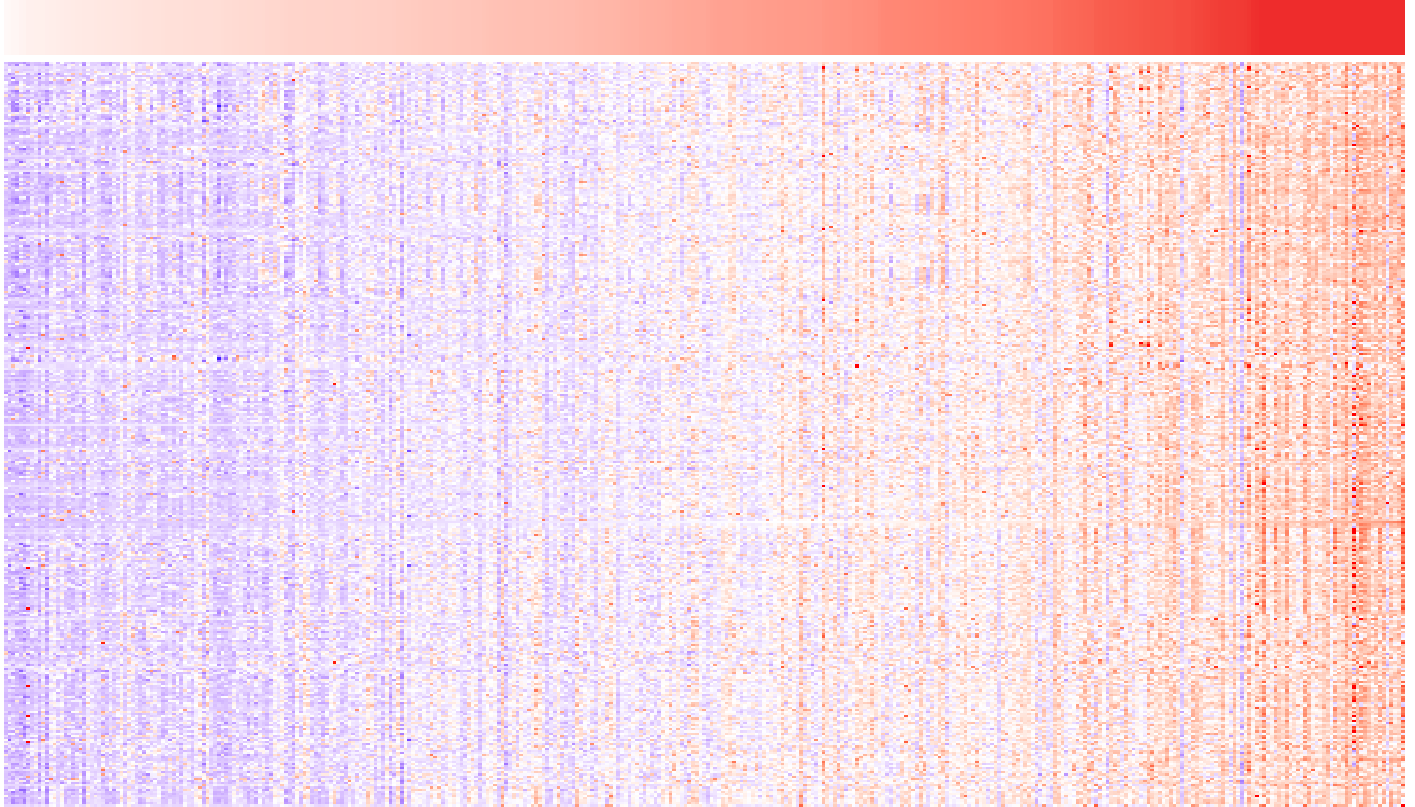

PD1

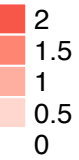

## pathway\_type

- Antigen processing and presentation
- B cell receptor signaling pathway
- C-type lectin receptor signaling pathway
- Chemokine signaling pathway
- Complement and coagulation cascades
- Fc epsilon RI signaling pathway
- Fc gamma R-mediated phagocytosis
- Leukocyte transendothelial migration
- Natural killer cell mediated cytotoxicity
- NOD-like receptor signaling pathway
- T cell receptor signaling pathway
- Th1 and Th2 cell differentiation
- Th17 cell differentiation
- Toll-like receptor signaling pathway

## expression

- 4
- 2
- 0
- -2
- -4

# TGCT

PD1

PD1

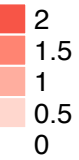

## pathway\_type

- Antigen processing and presentation
- B cell receptor signaling pathway
- C-type lectin receptor signaling pathway
- Chemokine signaling pathway
- Cytosolic DNA-sensing pathway
- Fc epsilon RI signaling pathway
- Fc gamma R-mediated phagocytosis
- Leukocyte transendothelial migration
- Natural killer cell mediated cytotoxicity
- NOD-like receptor signaling pathway
- T cell receptor signaling pathway
- Th1 and Th2 cell differentiation
- Th17 cell differentiation
- Toll-like receptor signaling pathway

## expression

- 4
- 2
- 0
- -2
- -4

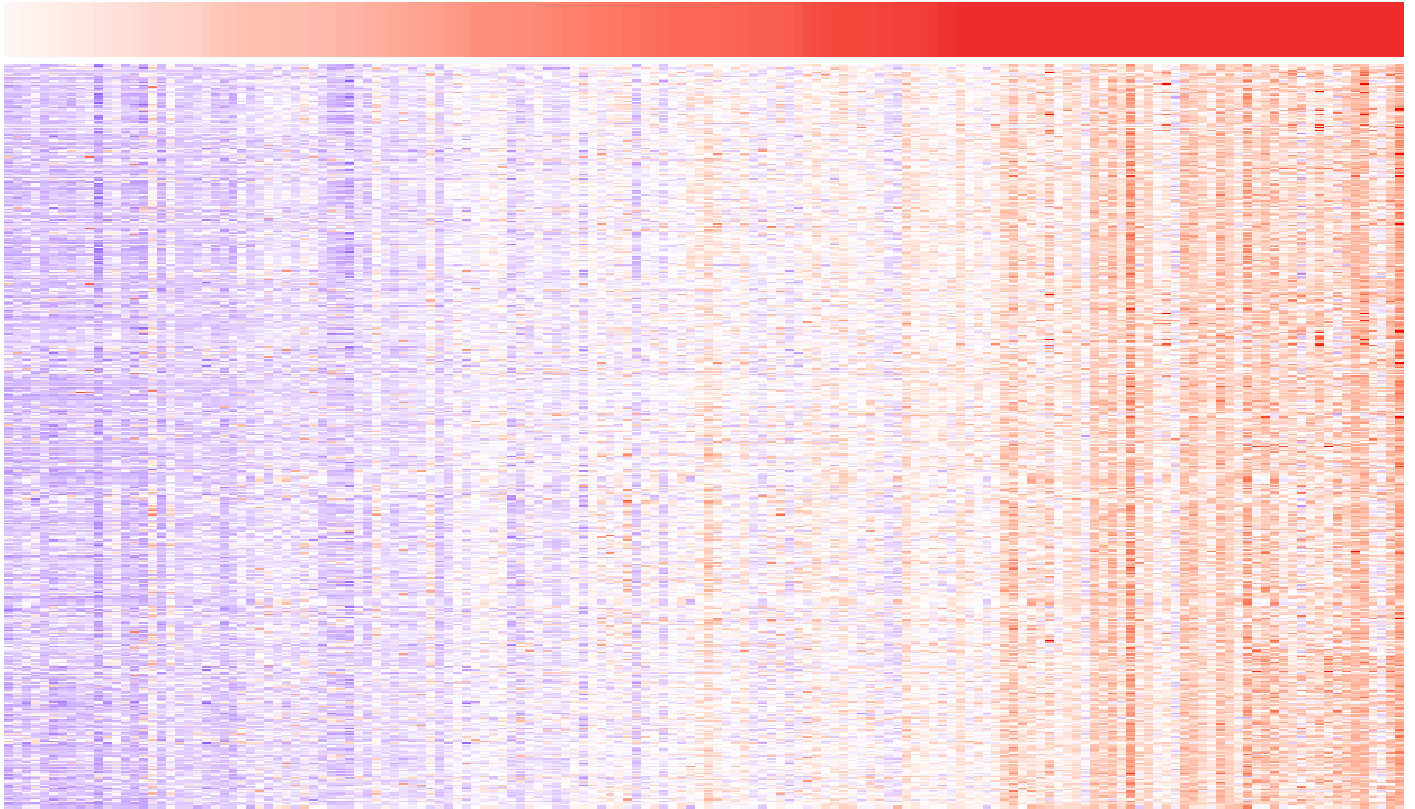

# THCA

PD1

PD1

3  
2  
1  
0

## pathway\_type

- Antigen processing and presentation
- B cell receptor signaling pathway
- C-type lectin receptor signaling pathway
- Chemokine signaling pathway
- Complement and coagulation cascades
- Cytosolic DNA-sensing pathway
- Fc gamma R-mediated phagocytosis
- Leukocyte transendothelial migration
- Natural killer cell mediated cytotoxicity
- NOD-like receptor signaling pathway
- T cell receptor signaling pathway
- Th1 and Th2 cell differentiation
- Th17 cell differentiation
- Toll-like receptor signaling pathway

## expression

- 4
- 2
- 0
- 2
- 4

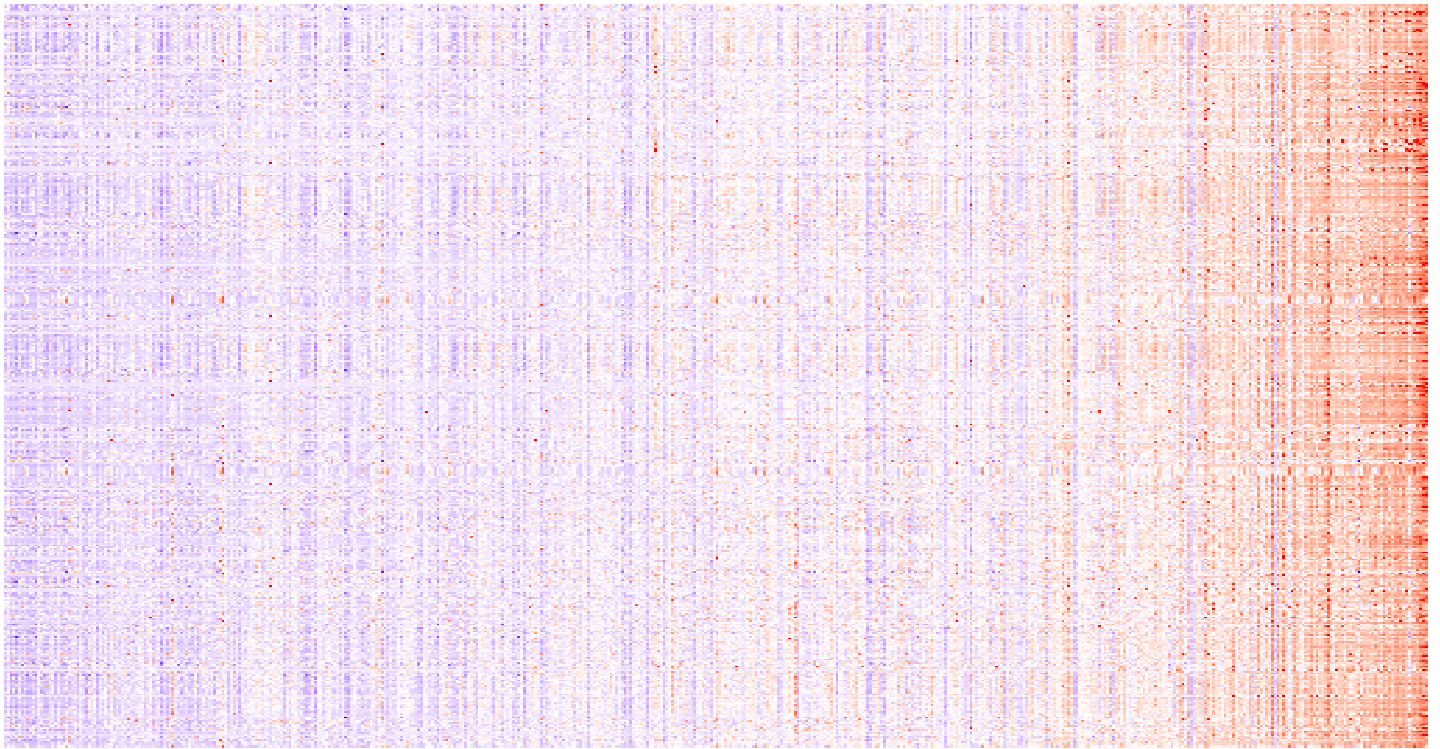

# UCEC

PD1

PD1

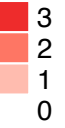

## pathway\_type

- Antigen processing and presentation
- B cell receptor signaling pathway
- Chemokine signaling pathway
- Complement and coagulation cascades
- Cytosolic DNA-sensing pathway
- Fc epsilon RI signaling pathway
- Fc gamma R-mediated phagocytosis
- Leukocyte transendothelial migration
- Natural killer cell mediated cytotoxicity
- NOD-like receptor signaling pathway
- T cell receptor signaling pathway
- Th1 and Th2 cell differentiation
- Th17 cell differentiation
- Toll-like receptor signaling pathway

## expression

- 4
- 2
- 0
- 2
- 4

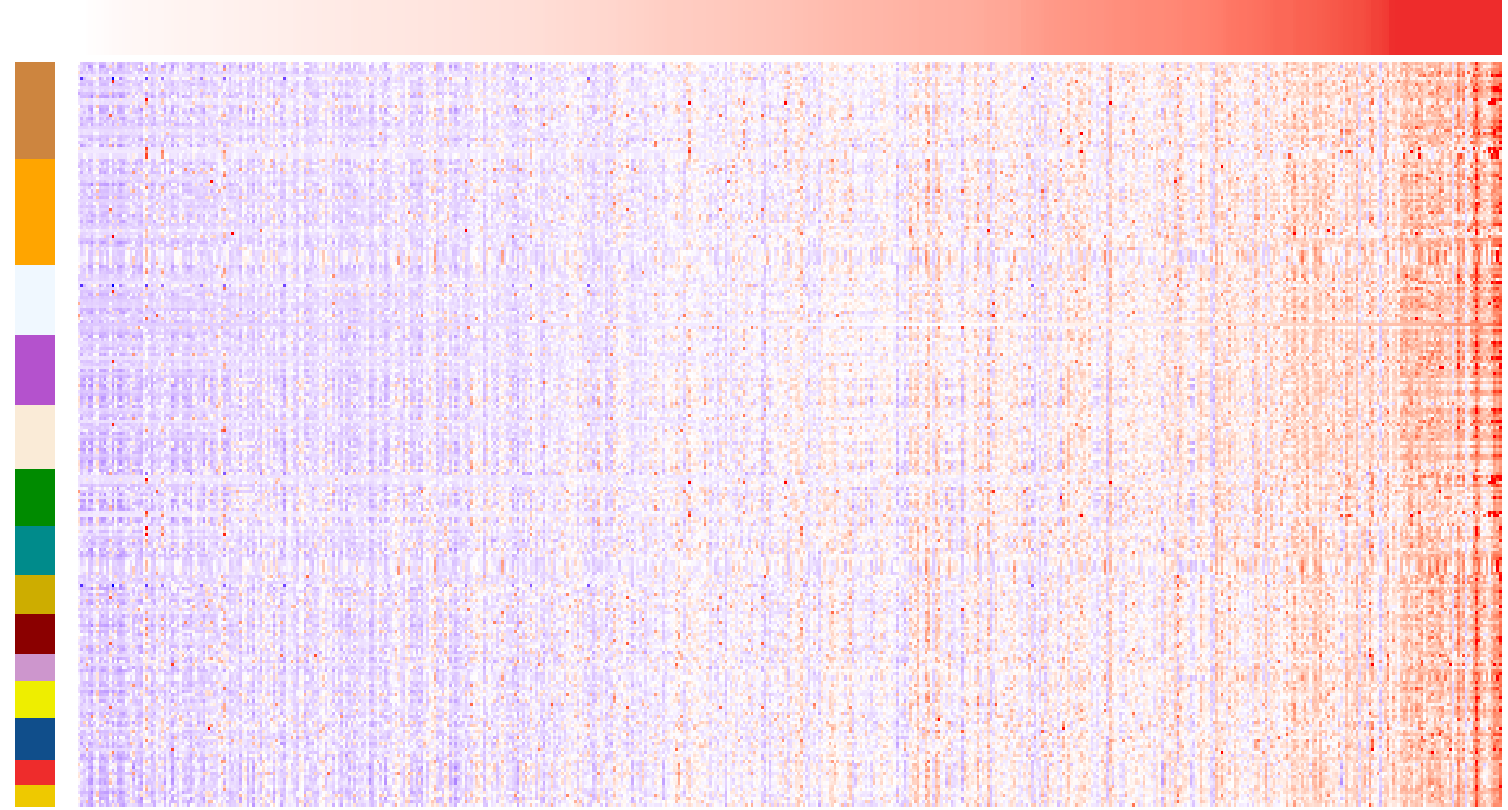

# UCS

PD1

PD1

2  
1.5  
1  
0.5  
0

## pathway\_type

- Antigen processing and presentation
- B cell receptor signaling pathway
- C-type lectin receptor signaling pathway
- Chemokine signaling pathway
- Cytosolic DNA-sensing pathway
- Fc epsilon RI signaling pathway
- Leukocyte transendothelial migration
- Natural killer cell mediated cytotoxicity
- NOD-like receptor signaling pathway
- T cell receptor signaling pathway
- Th1 and Th2 cell differentiation
- Th17 cell differentiation
- Toll-like receptor signaling pathway

## expression

- 4
- 2
- 0
- -2
- -4

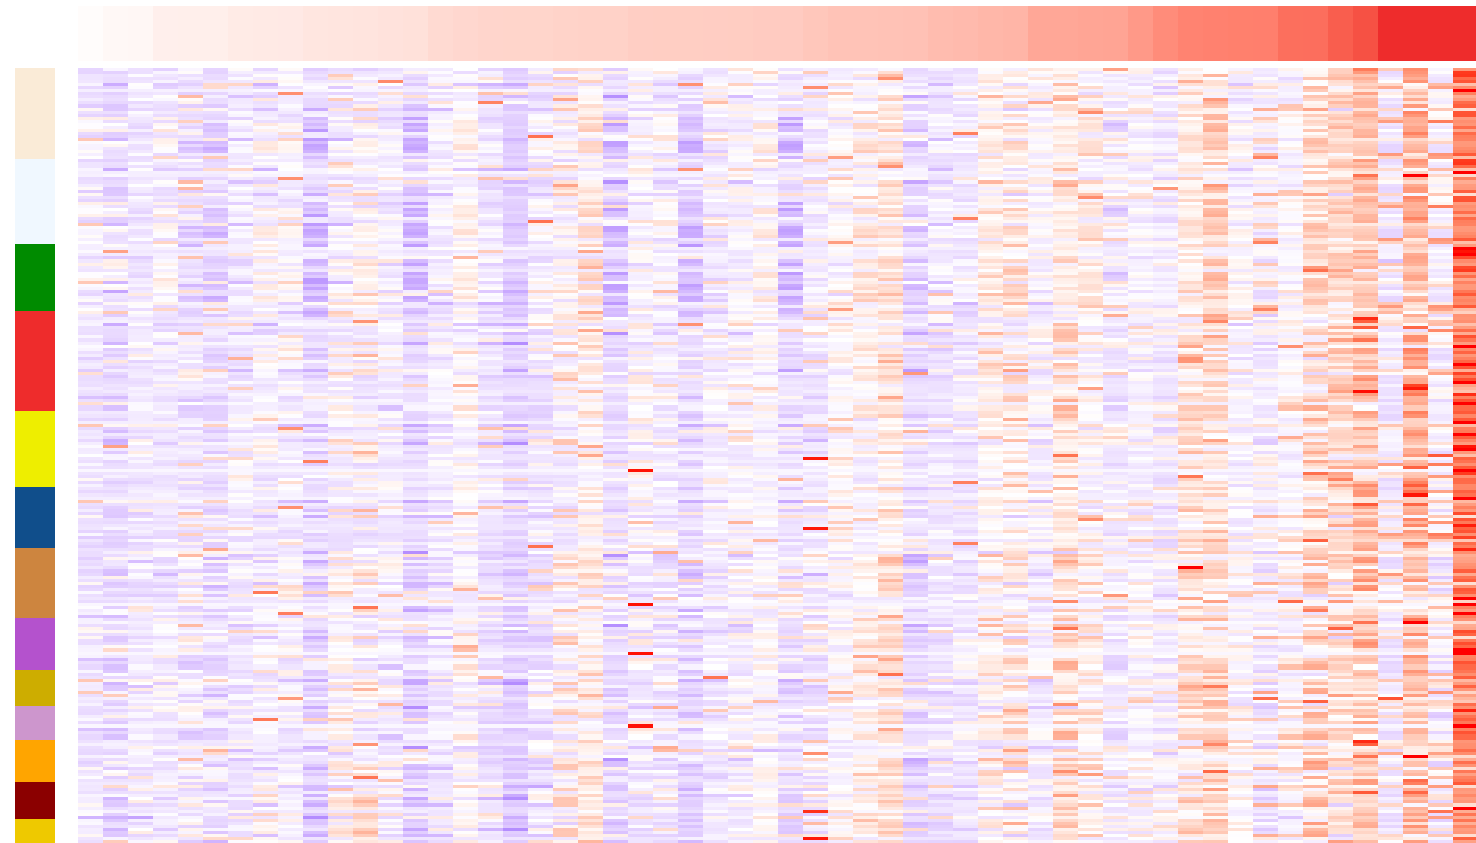

# UVM

PD1

PD1

2  
1.5  
1  
0.5  
0

## pathway\_type

- Antigen processing and presentation
- B cell receptor signaling pathway
- C-type lectin receptor signaling pathway
- Chemokine signaling pathway
- Cytosolic DNA-sensing pathway
- Fc epsilon RI signaling pathway
- Fc gamma R-mediated phagocytosis
- IL-17 signaling pathway
- Leukocyte transendothelial migration
- Natural killer cell mediated cytotoxicity
- NOD-like receptor signaling pathway
- T cell receptor signaling pathway
- Th1 and Th2 cell differentiation
- Th17 cell differentiation
- Toll-like receptor signaling pathway

## expression

- 4
- 2
- 0
- 2
- 4

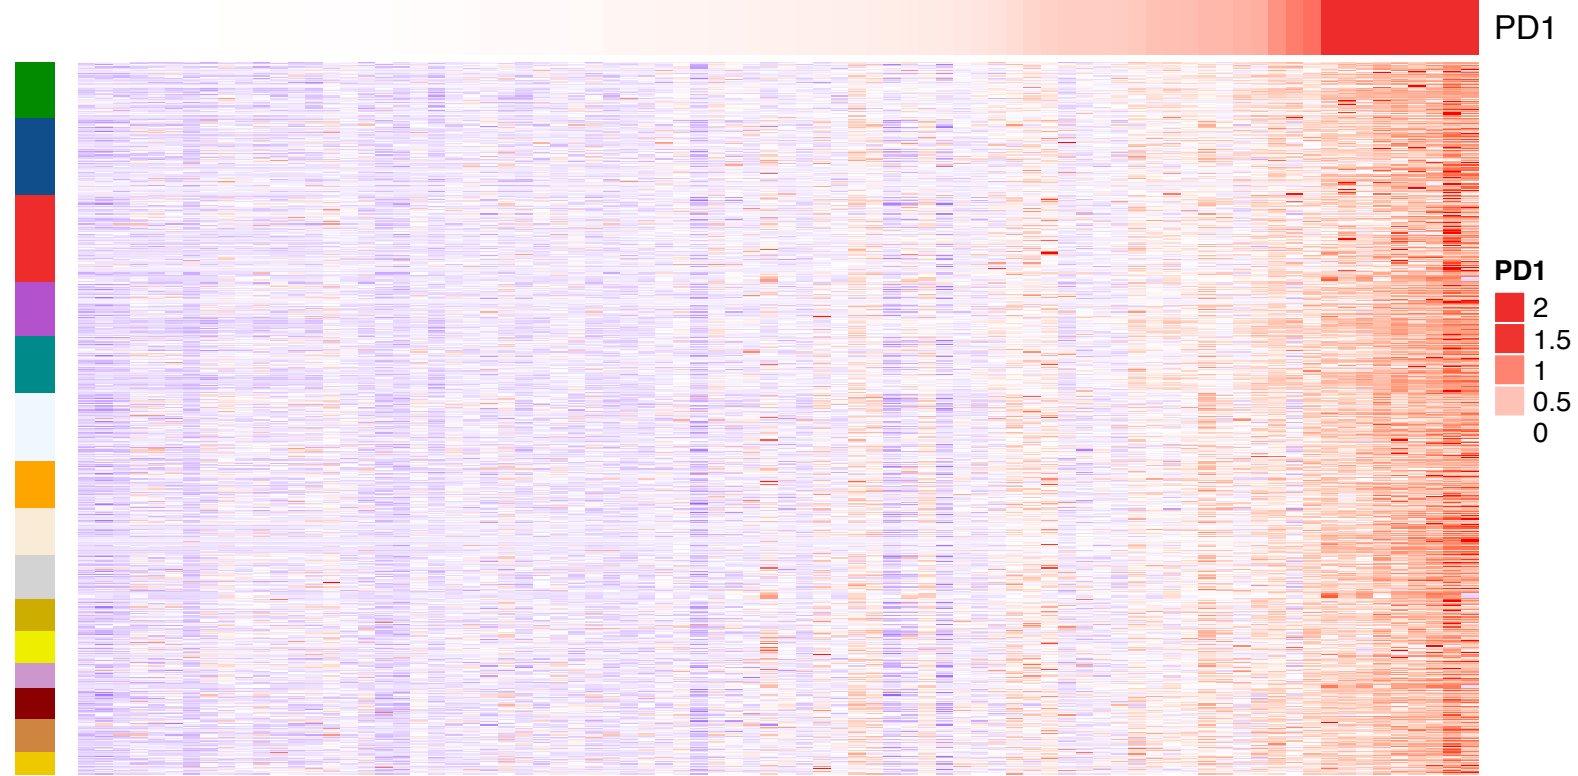

Supplement: MOESM3 [file 16359760]
