# Supplementary material for: Analysis of PD-1 related immune transcriptional profile in different cancer types
Source: Springer Nature journal article supplement (doi:10.1186/s12935-018-0712-y), 2018-12-01

Figure S3

ACC

PD1

PD1  
1.5  
1  
0.5  
0

go\_term

- activation of immune response
- immune effector process
- immune system development
- leukocyte homeostasis
- leukocyte mediated cytotoxicity
- production of molecular mediator of immune response
- somatic diversification of immune receptors

expression

- 4
- 2
- 0
- 2
- 4

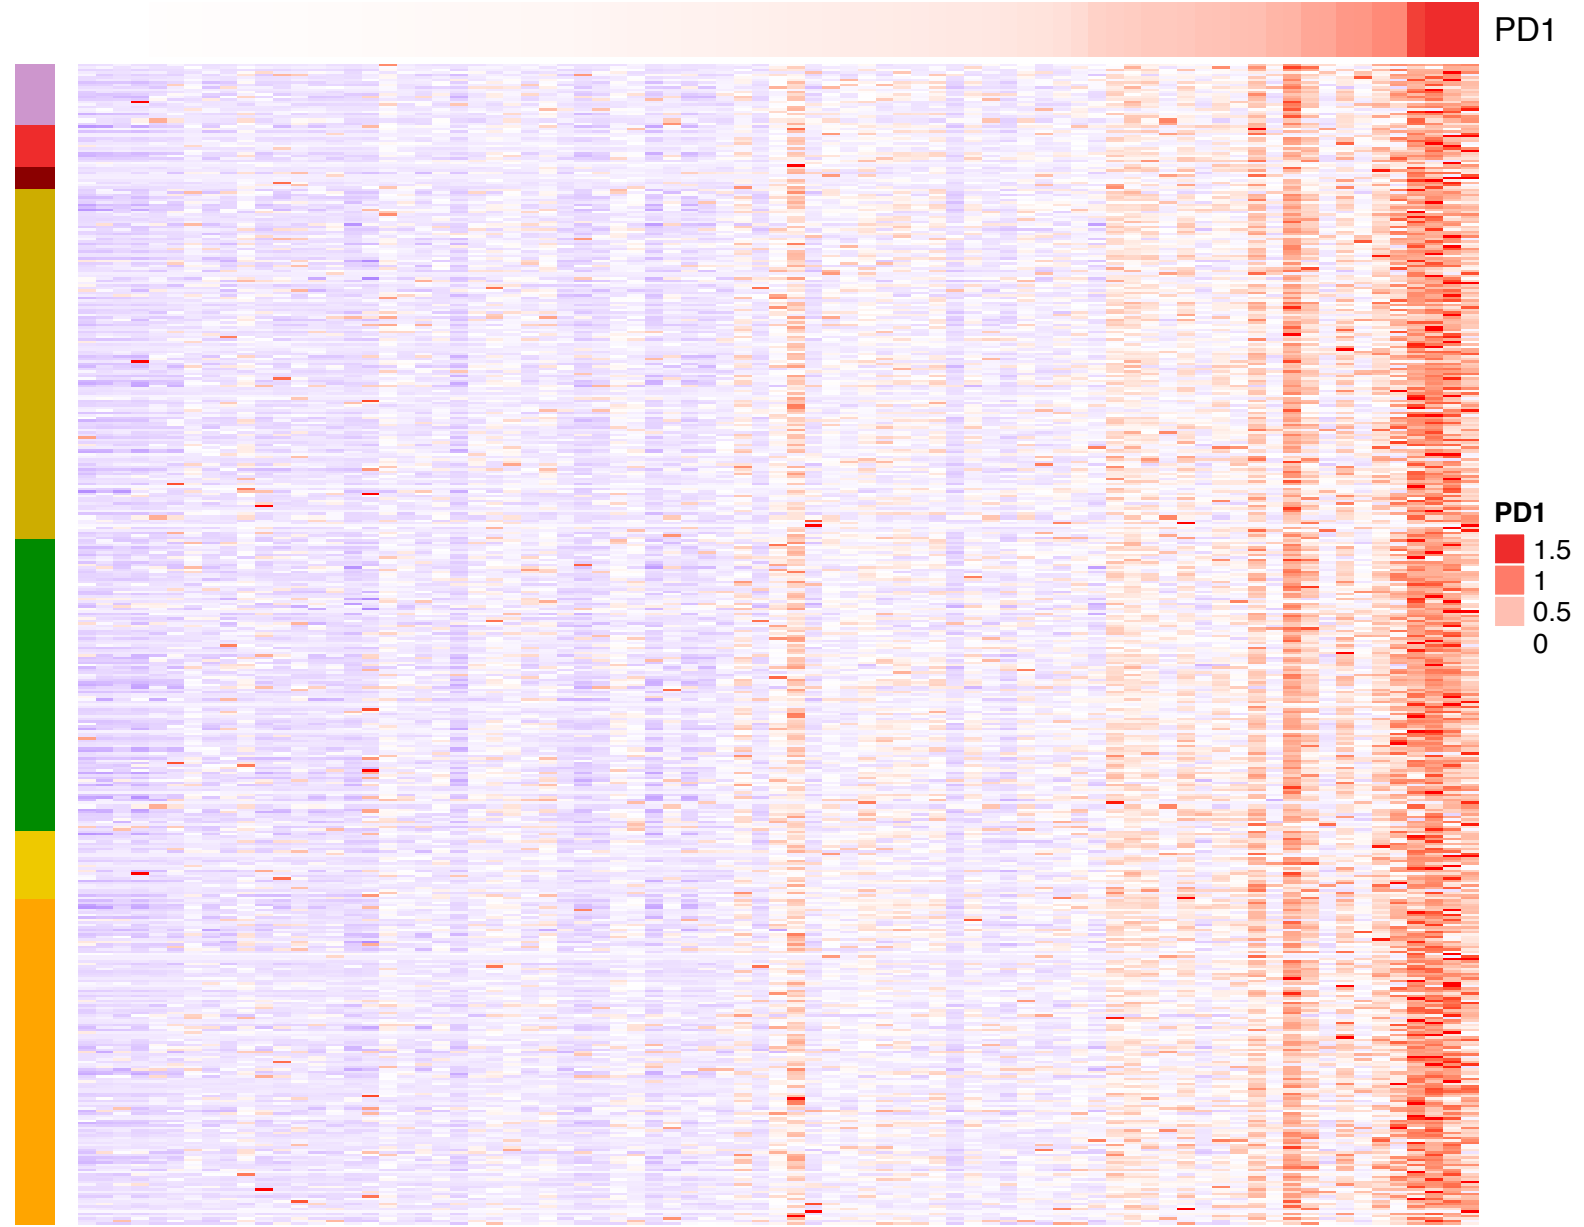

# BLCA

PD1

PD1

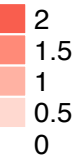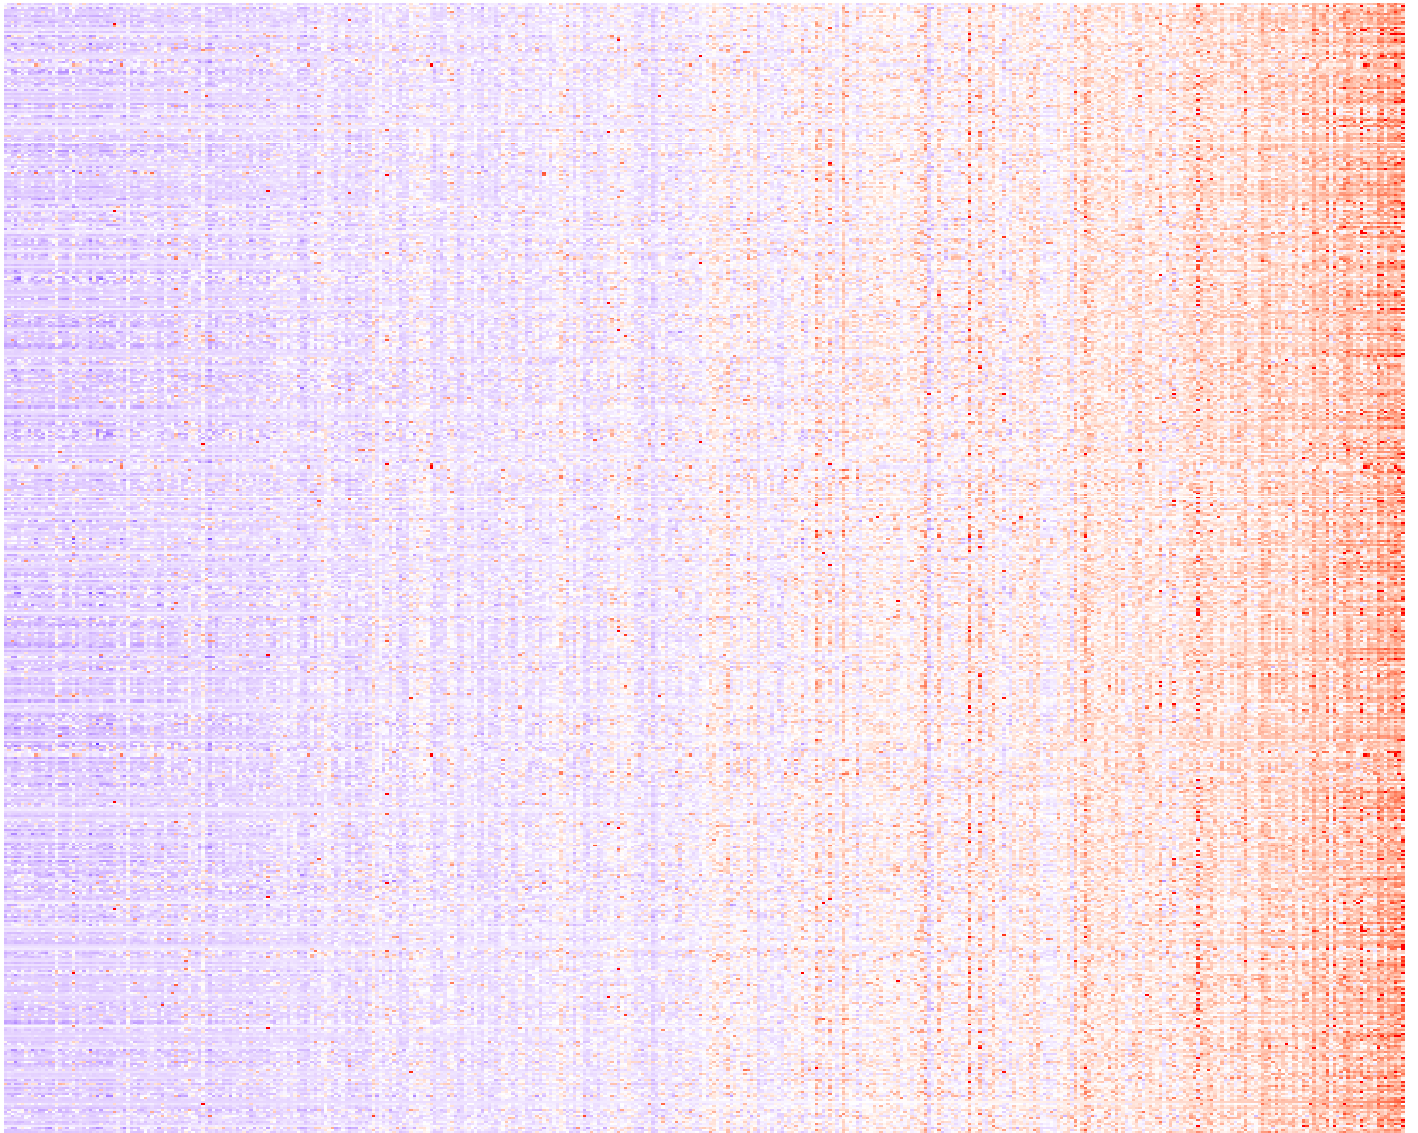

## go\_term

- activation of immune response
- complement-dependent cytotoxicity
- immune effector process
- immune system development
- leukocyte homeostasis
- leukocyte mediated cytotoxicity
- production of molecular mediator of immune response
- somatic diversification of immune receptors

## expression

- 4
- 2
- 0
- 2
- 4

# BRCA

PD1

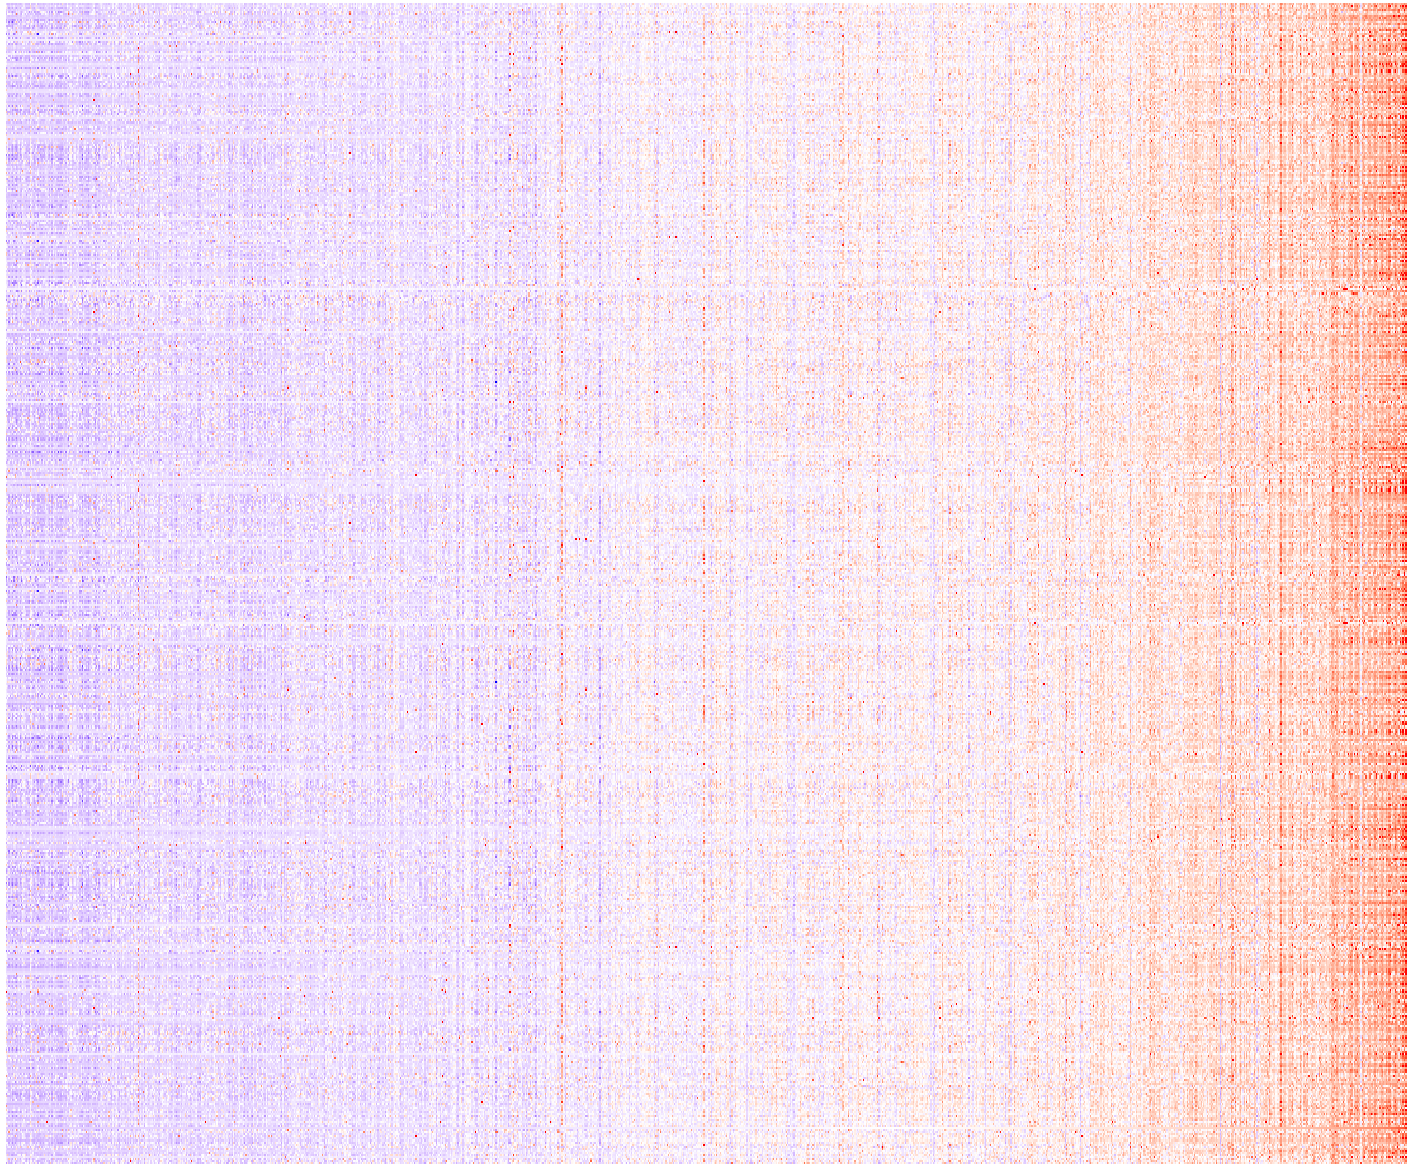

PD1

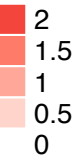

## go\_term

- activation of immune response
- immune effector process
- immune system development
- leukocyte homeostasis
- leukocyte mediated cytotoxicity
- production of molecular mediator of immune response
- somatic diversification of immune receptors

## expression

- 4
- 2
- 0
- 2
- 4

# CESC

PD1

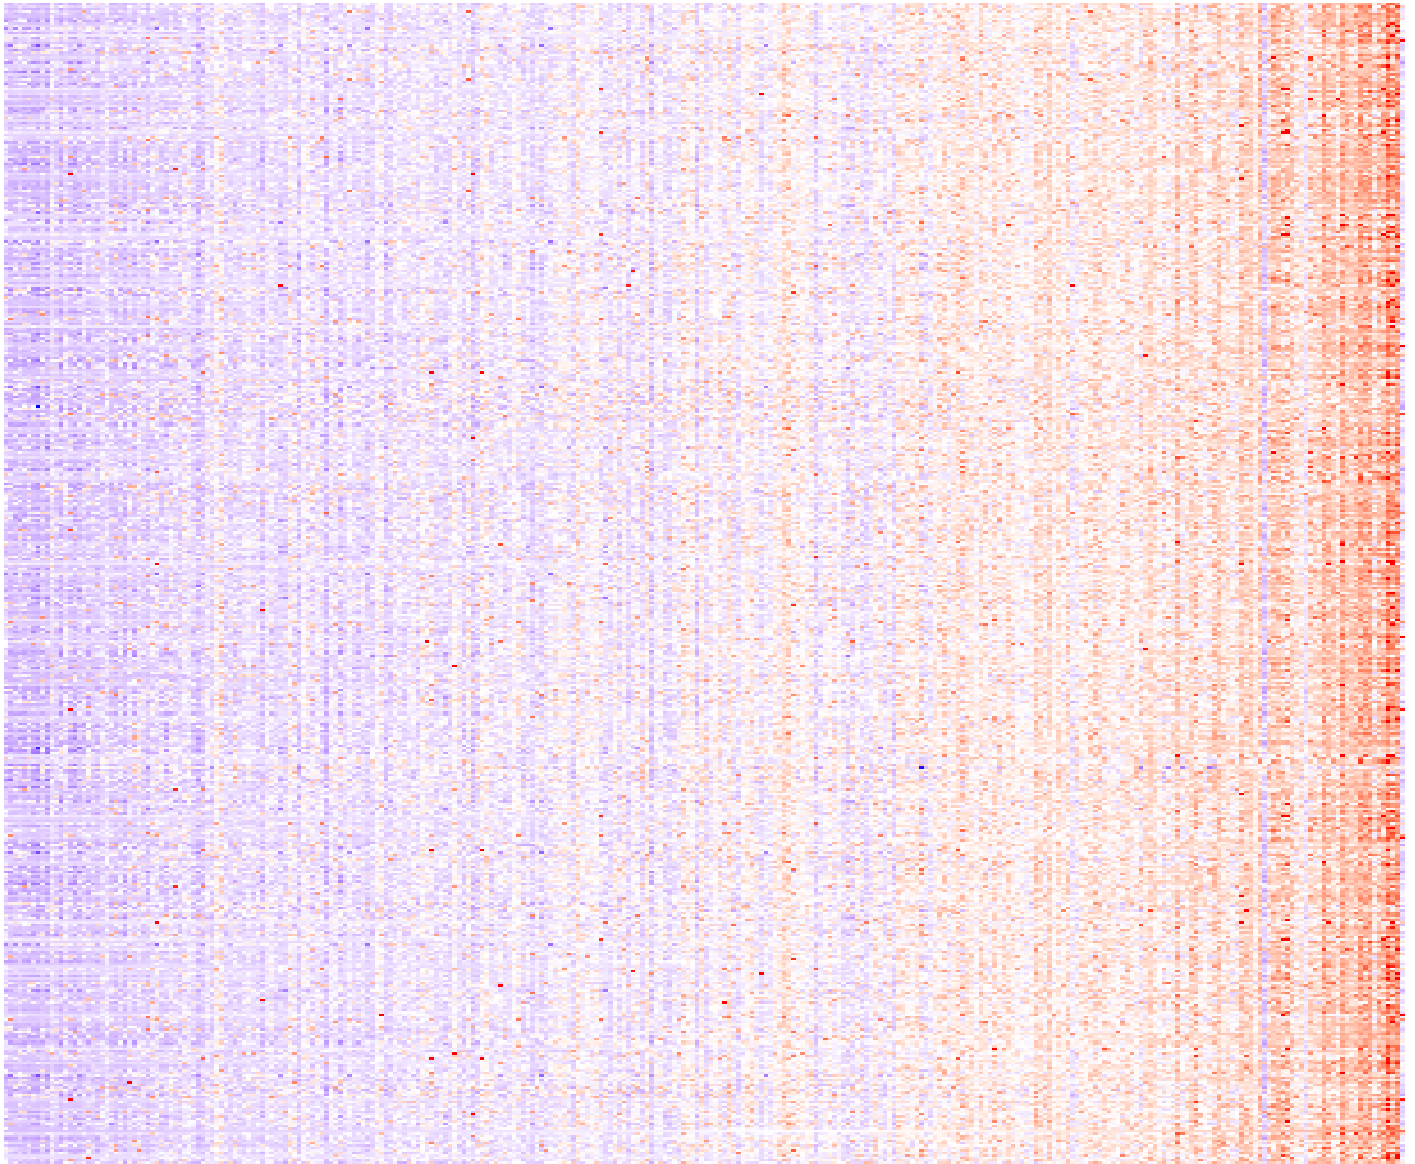

PD1

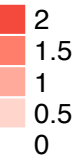

## go\_term

- activation of immune response
- immune effector process
- immune system development
- leukocyte homeostasis
- leukocyte mediated cytotoxicity
- production of molecular mediator of immune response
- somatic diversification of immune receptors

## expression

- 4
- 2
- 0
- 2
- 4



# CHOL

PD1

PD1

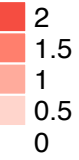

## go\_term

- activation of immune response
- complement-dependent cytotoxicity
- immune effector process
- immune system development
- leukocyte homeostasis
- leukocyte mediated cytotoxicity
- production of molecular mediator of immune response
- somatic diversification of immune receptors

## expression

- 4
- 2
- 0
- 2
- 4

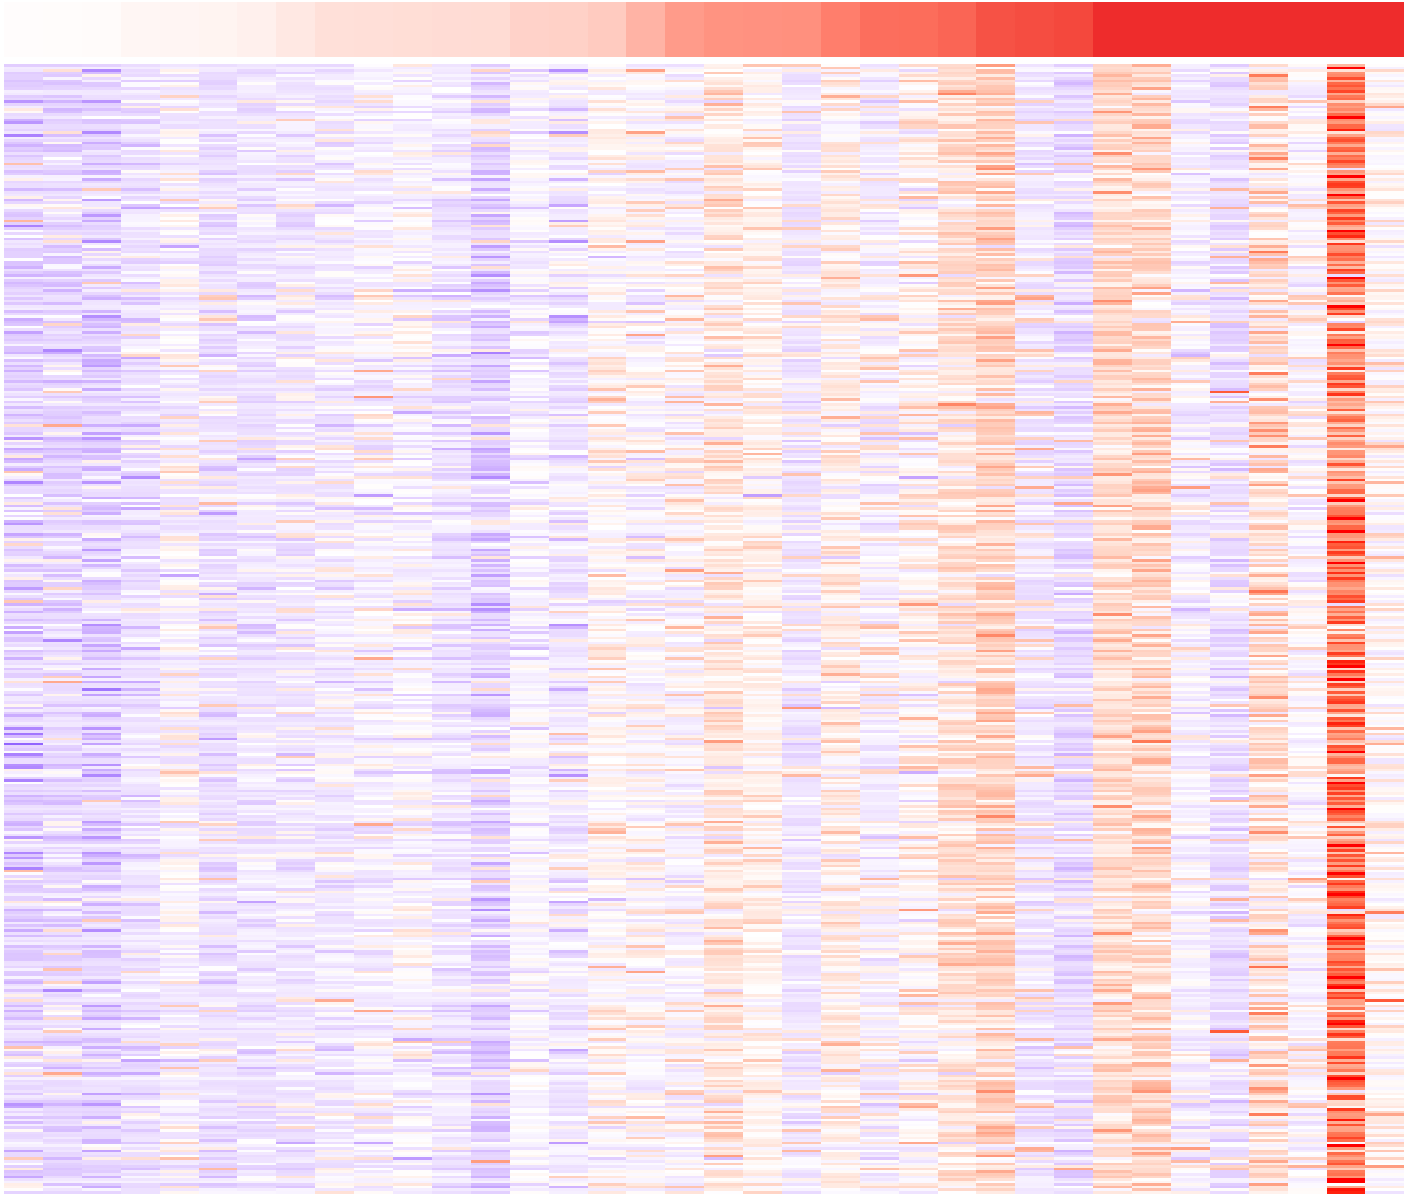

# COAD

PD1

PD1  
2  
1.5  
1  
0.5  
0

## go\_term

- activation of immune response
- immune effector process
- immune system development
- leukocyte homeostasis
- leukocyte mediated cytotoxicity
- production of molecular mediator of immune response
- somatic diversification of immune receptors

## expression

- 4
- 2
- 0
- 2
- 4

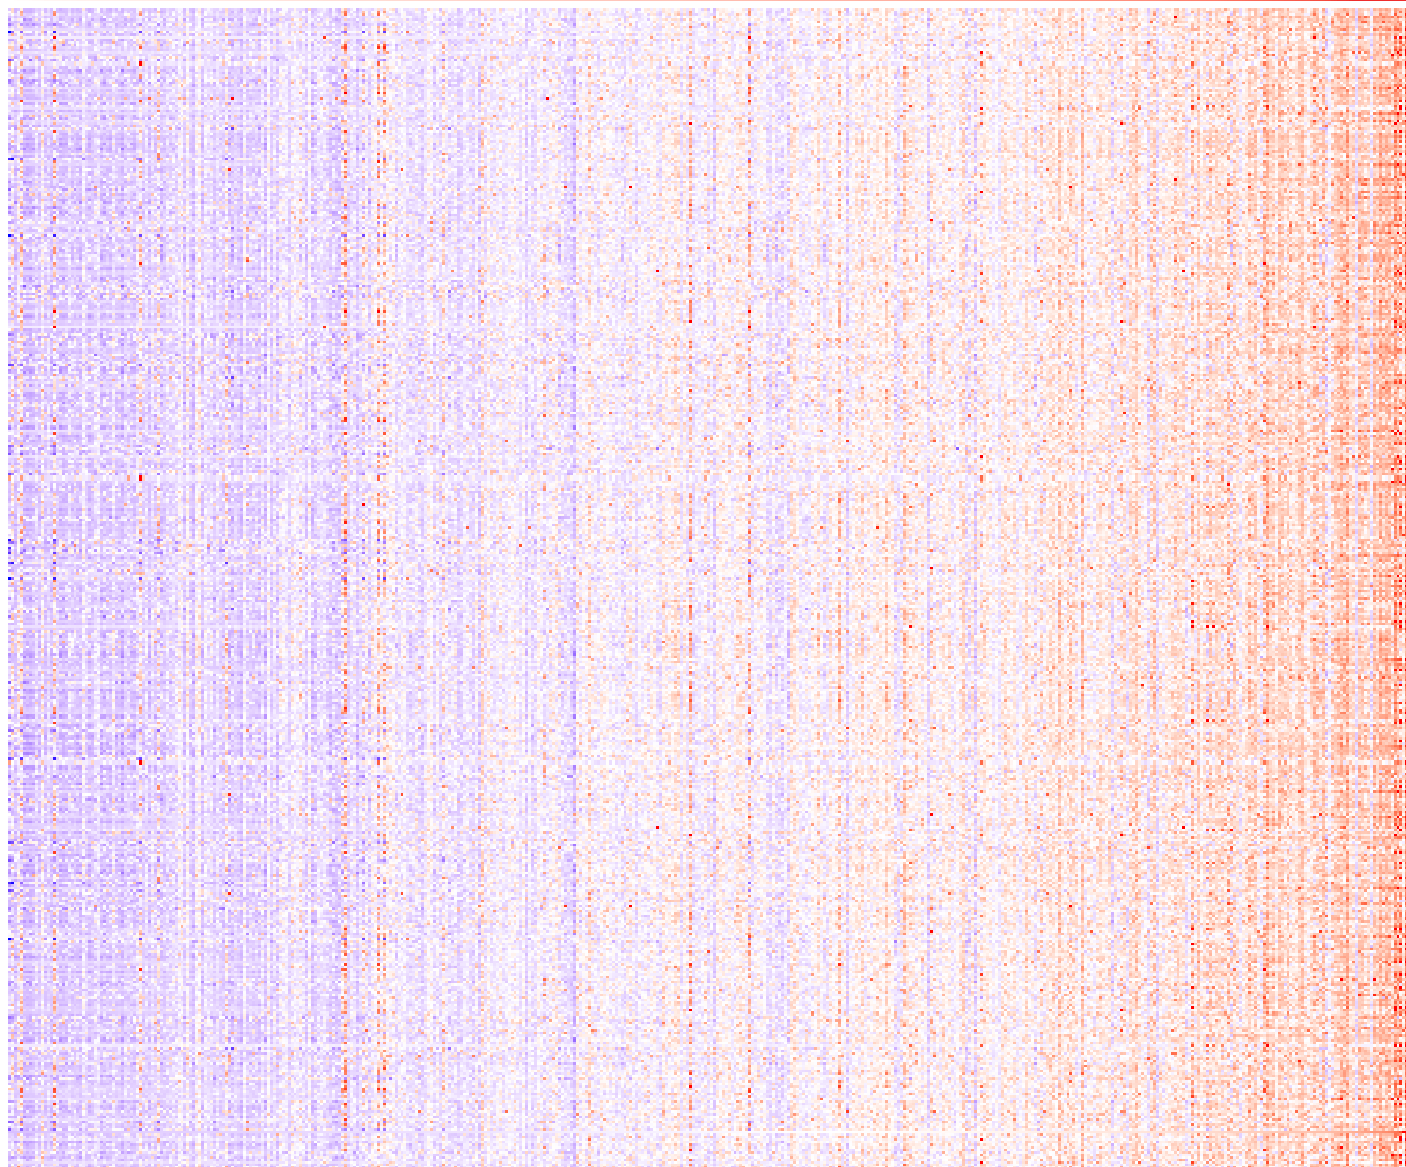

# DLBC

PD1

PD1

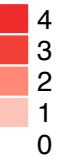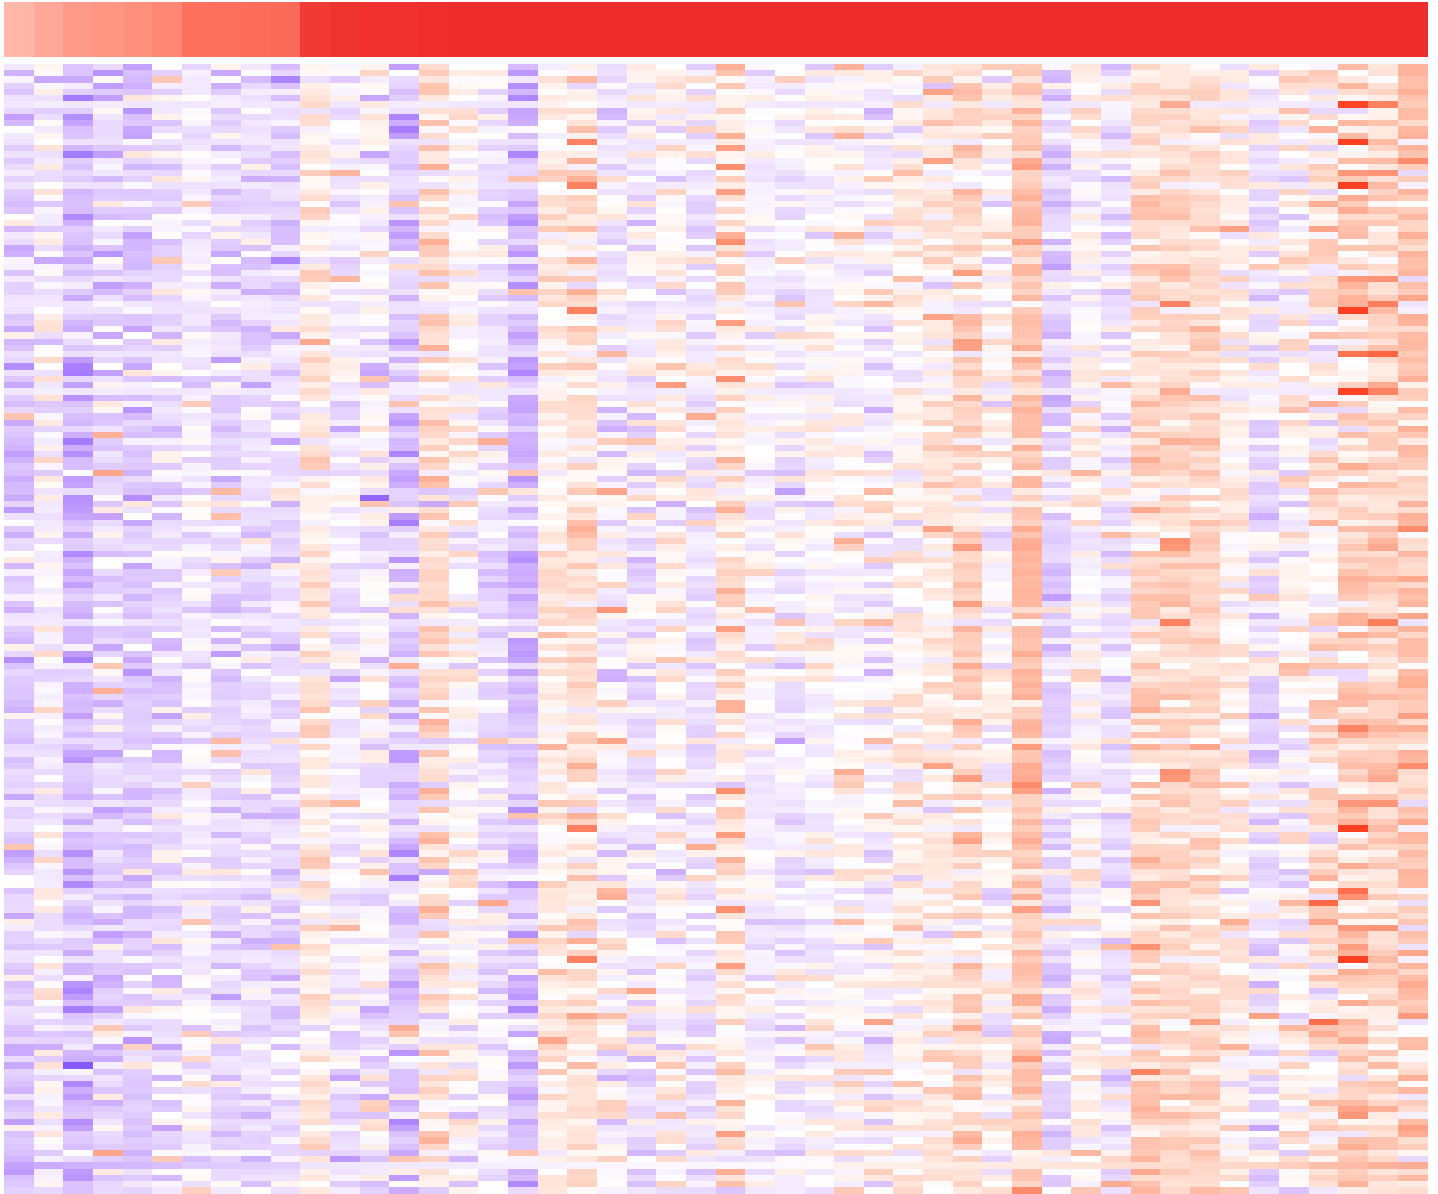

## go\_term

- activation of immune response
- complement-dependent cytotoxicity
- immune effector process
- immune system development
- leukocyte homeostasis
- leukocyte mediated cytotoxicity
- production of molecular mediator of immune response
- somatic diversification of immune receptors

## expression

- 4
- 2
- 0
- 2
- 4

# ESCA

PD1

PD1  
2  
1.5  
1  
0.5  
0

## go\_term

- activation of immune response
- immune effector process
- immune system development
- leukocyte homeostasis
- leukocyte mediated cytotoxicity
- production of molecular mediator of immune response
- somatic diversification of immune receptors

## expression

- 4
- 2
- 0
- 2
- 4

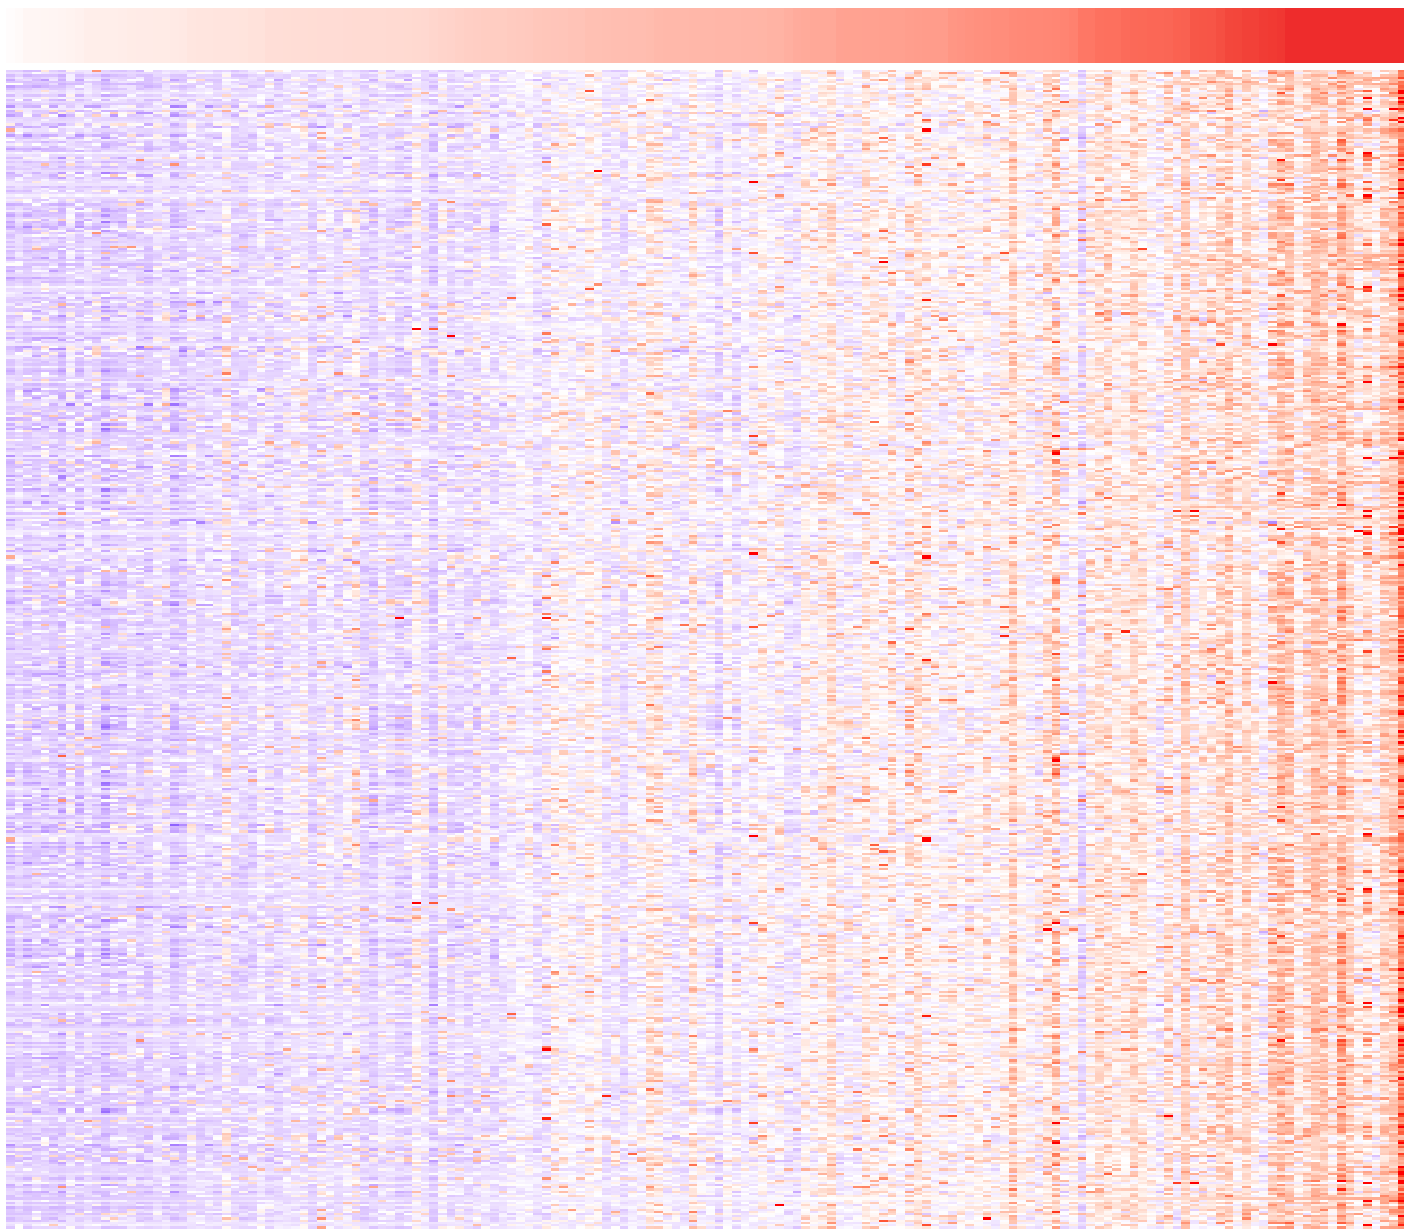

# GBM

PD1

PD1

0.8  
0.6  
0.4  
0.2  
0

go\_term

- activation of immune response
- immune effector process
- immune system development
- leukocyte homeostasis
- leukocyte mediated cytotoxicity
- production of molecular mediator of immune response
- somatic diversification of immune receptors

expression

- 4
- 2
- 0
- 2
- 4

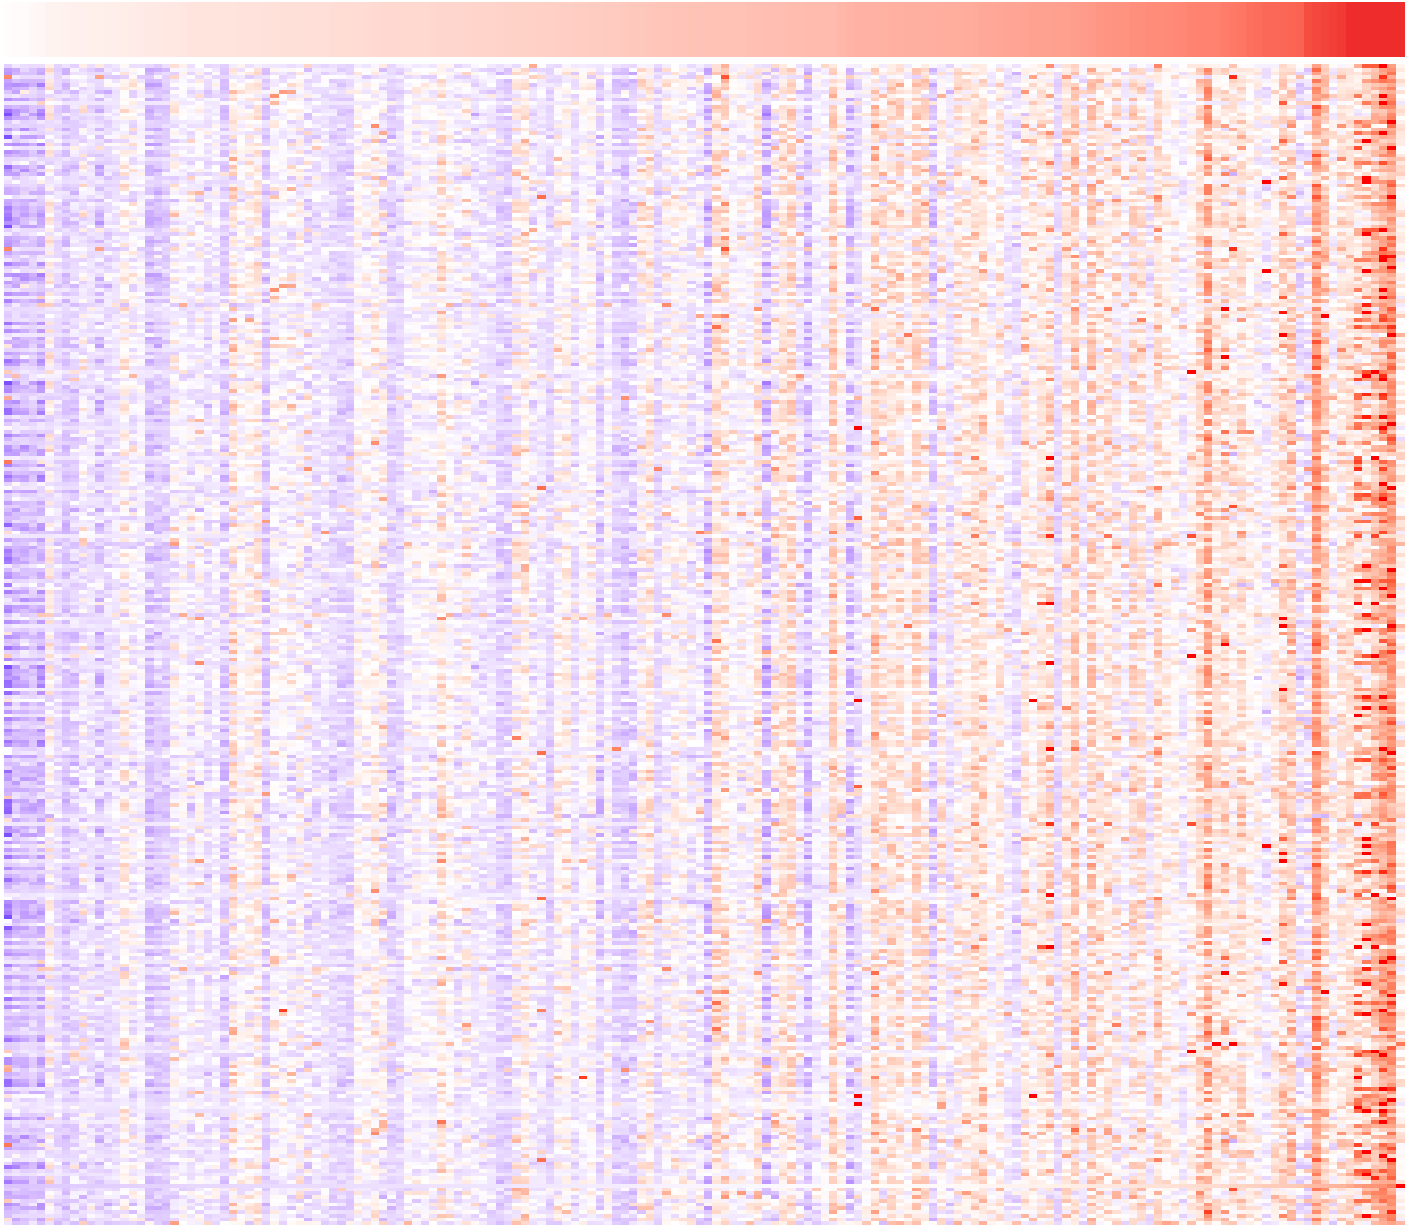



# HNSC

PD1

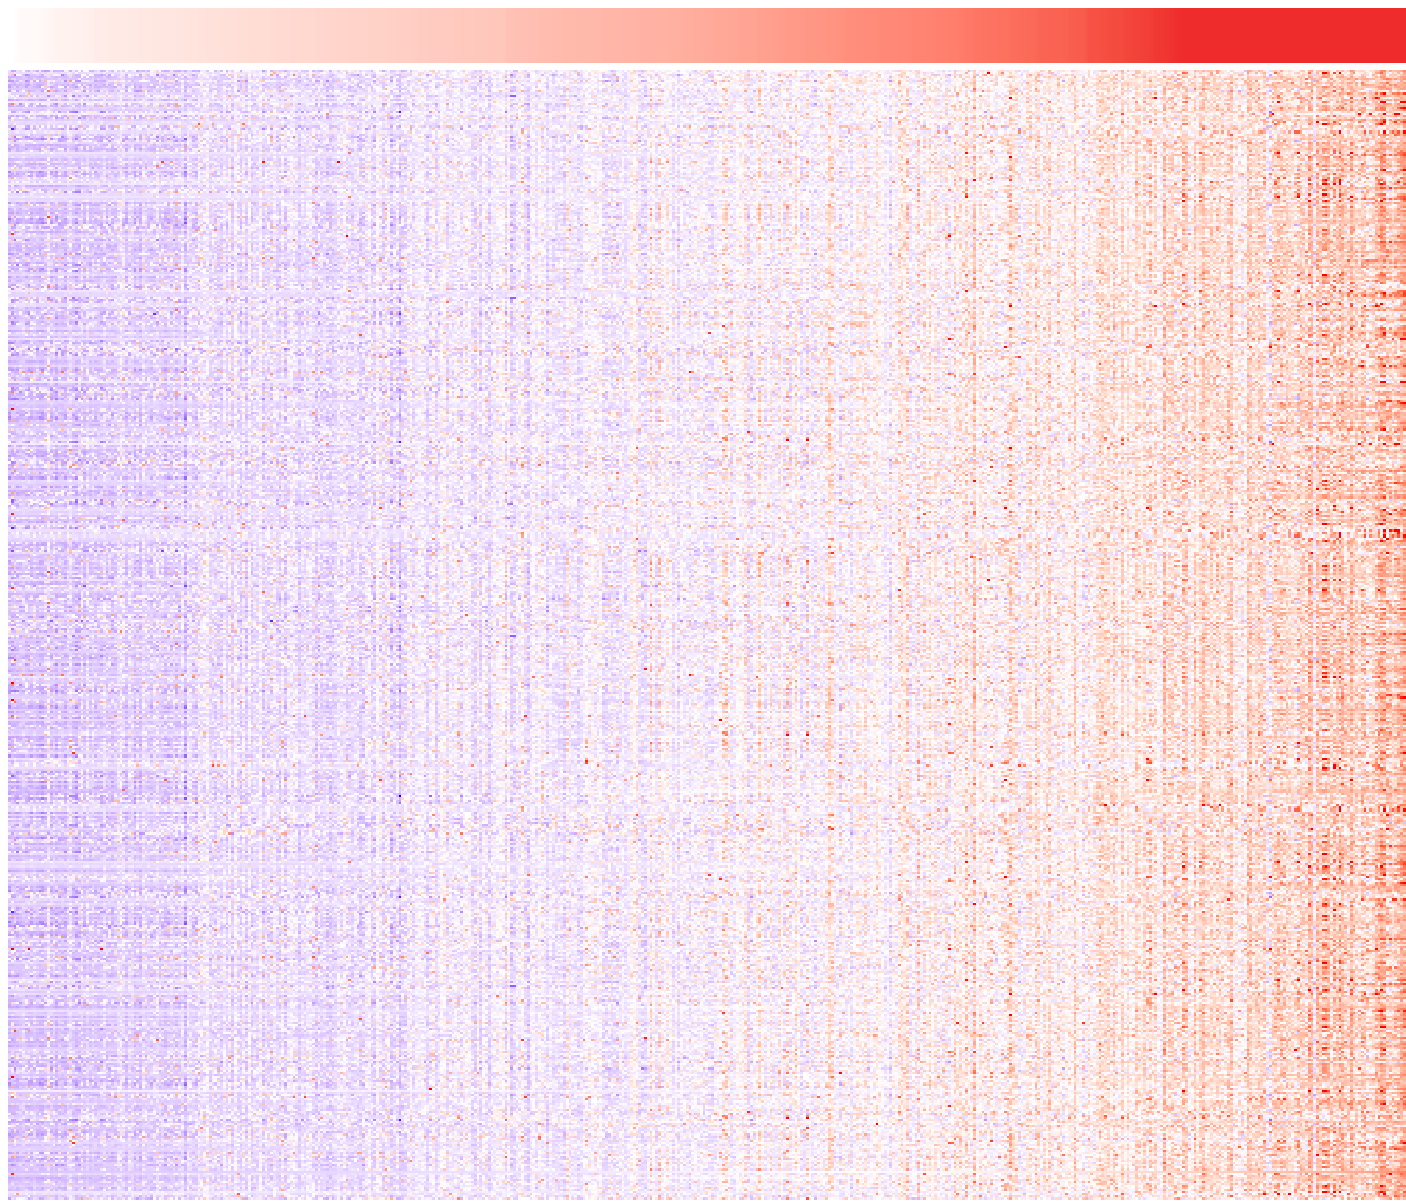

PD1

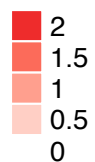

## go\_term

- activation of immune response
- complement-dependent cytotoxicity
- immune effector process
- immune system development
- leukocyte homeostasis
- leukocyte mediated cytotoxicity
- production of molecular mediator of immune response
- somatic diversification of immune receptors

## expression

- 4
- 2
- 0
- 2
- 4

# KICH

PD1

PD1

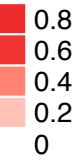

## go\_term

- activation of immune response
- complement-dependent cytotoxicity
- immune effector process
- immune system development
- leukocyte homeostasis
- leukocyte mediated cytotoxicity
- production of molecular mediator of immune response
- somatic diversification of immune receptors

## expression

- 4
- 2
- 0
- 2
- 4

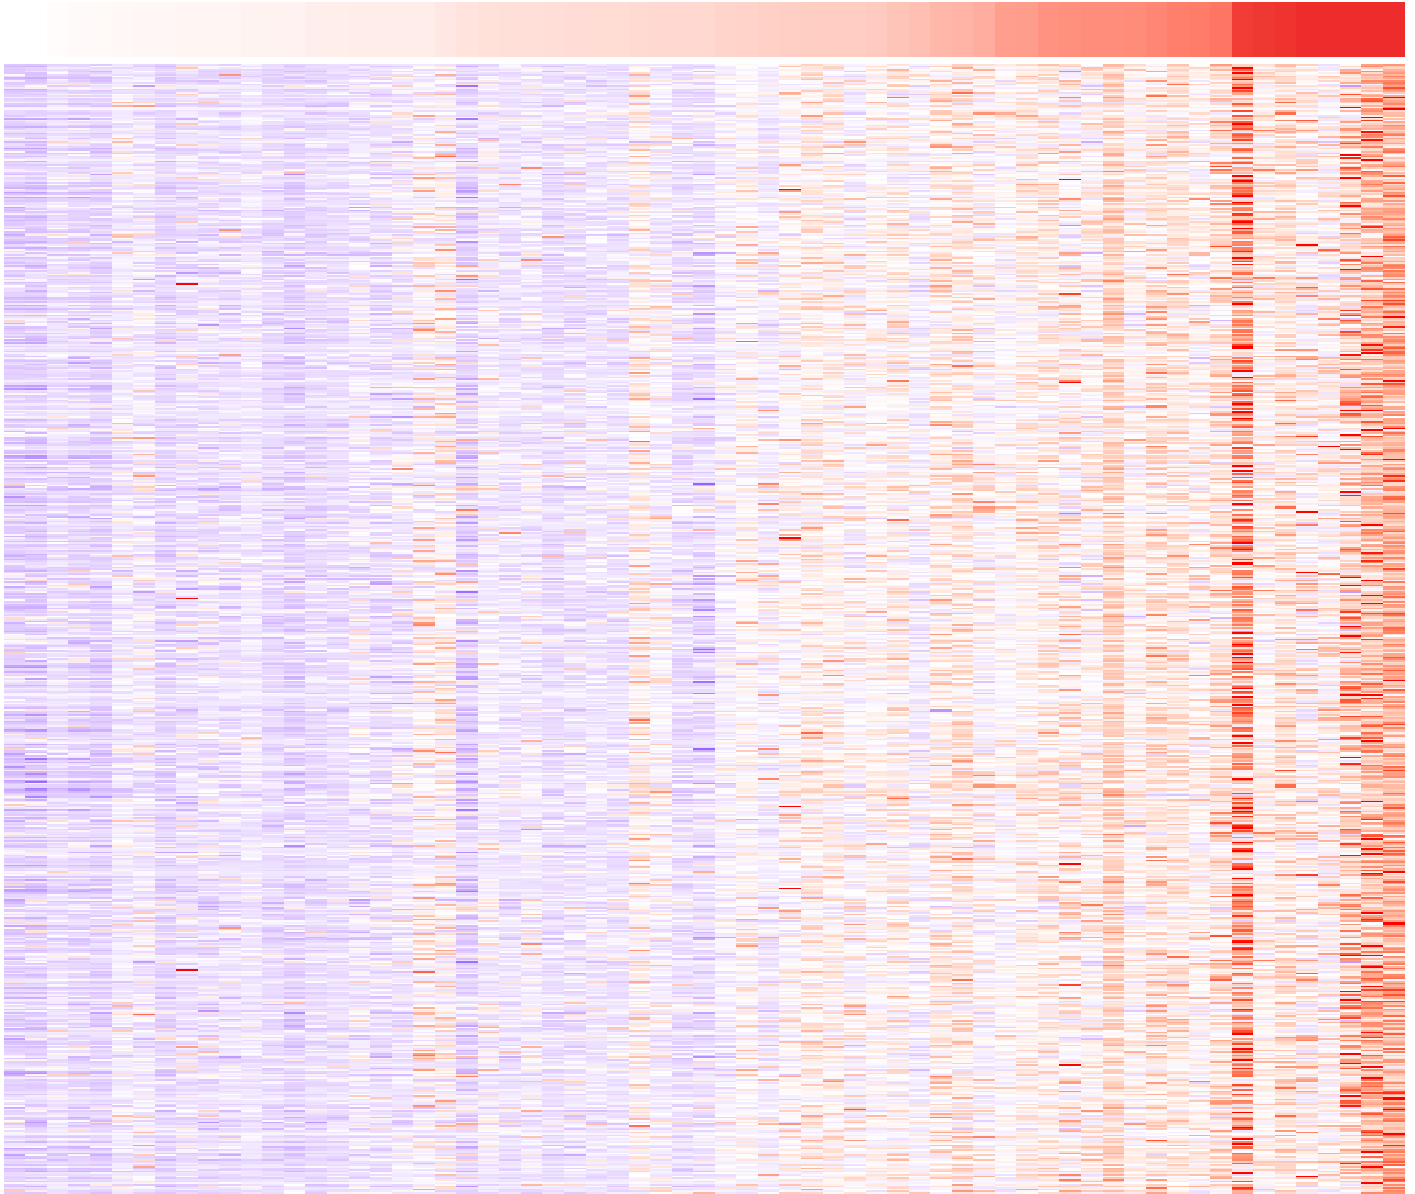

# KIRC

PD1

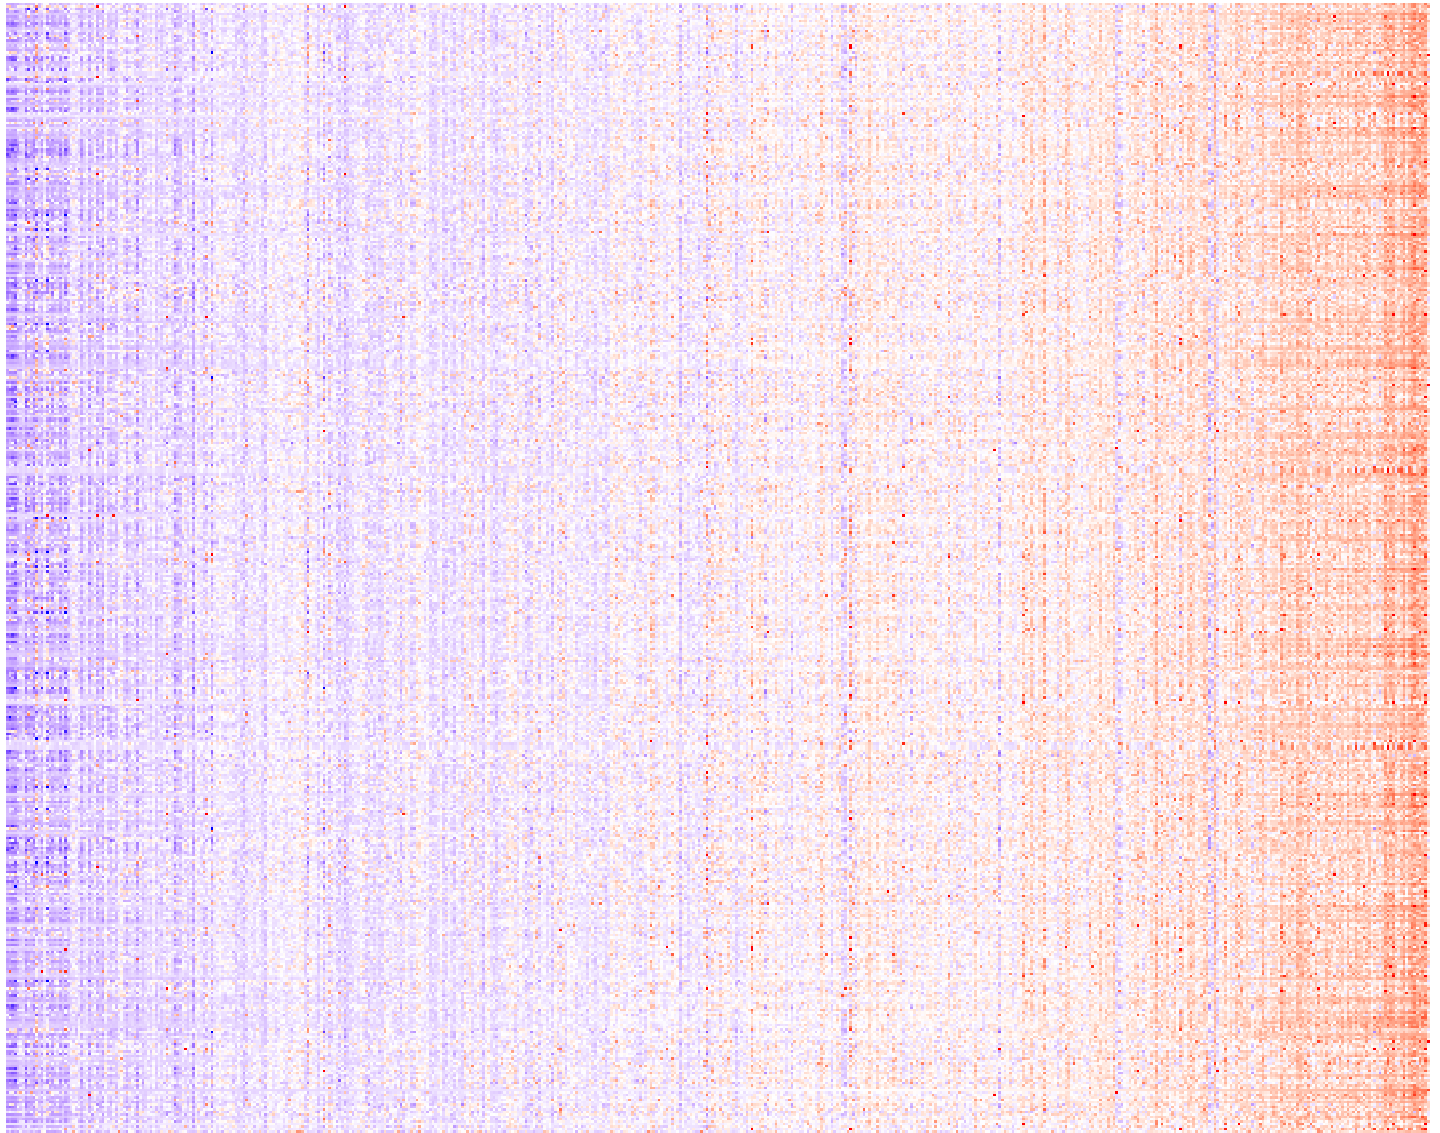

PD1

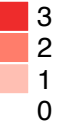

## go\_term

- activation of immune response
- complement-dependent cytotoxicity
- immune effector process
- immune system development
- leukocyte homeostasis
- leukocyte mediated cytotoxicity
- production of molecular mediator of immune response
- somatic diversification of immune receptors

## expression

- 4
- 2
- 0
- 2
- 4

# KIRP

PD1

PD1

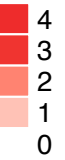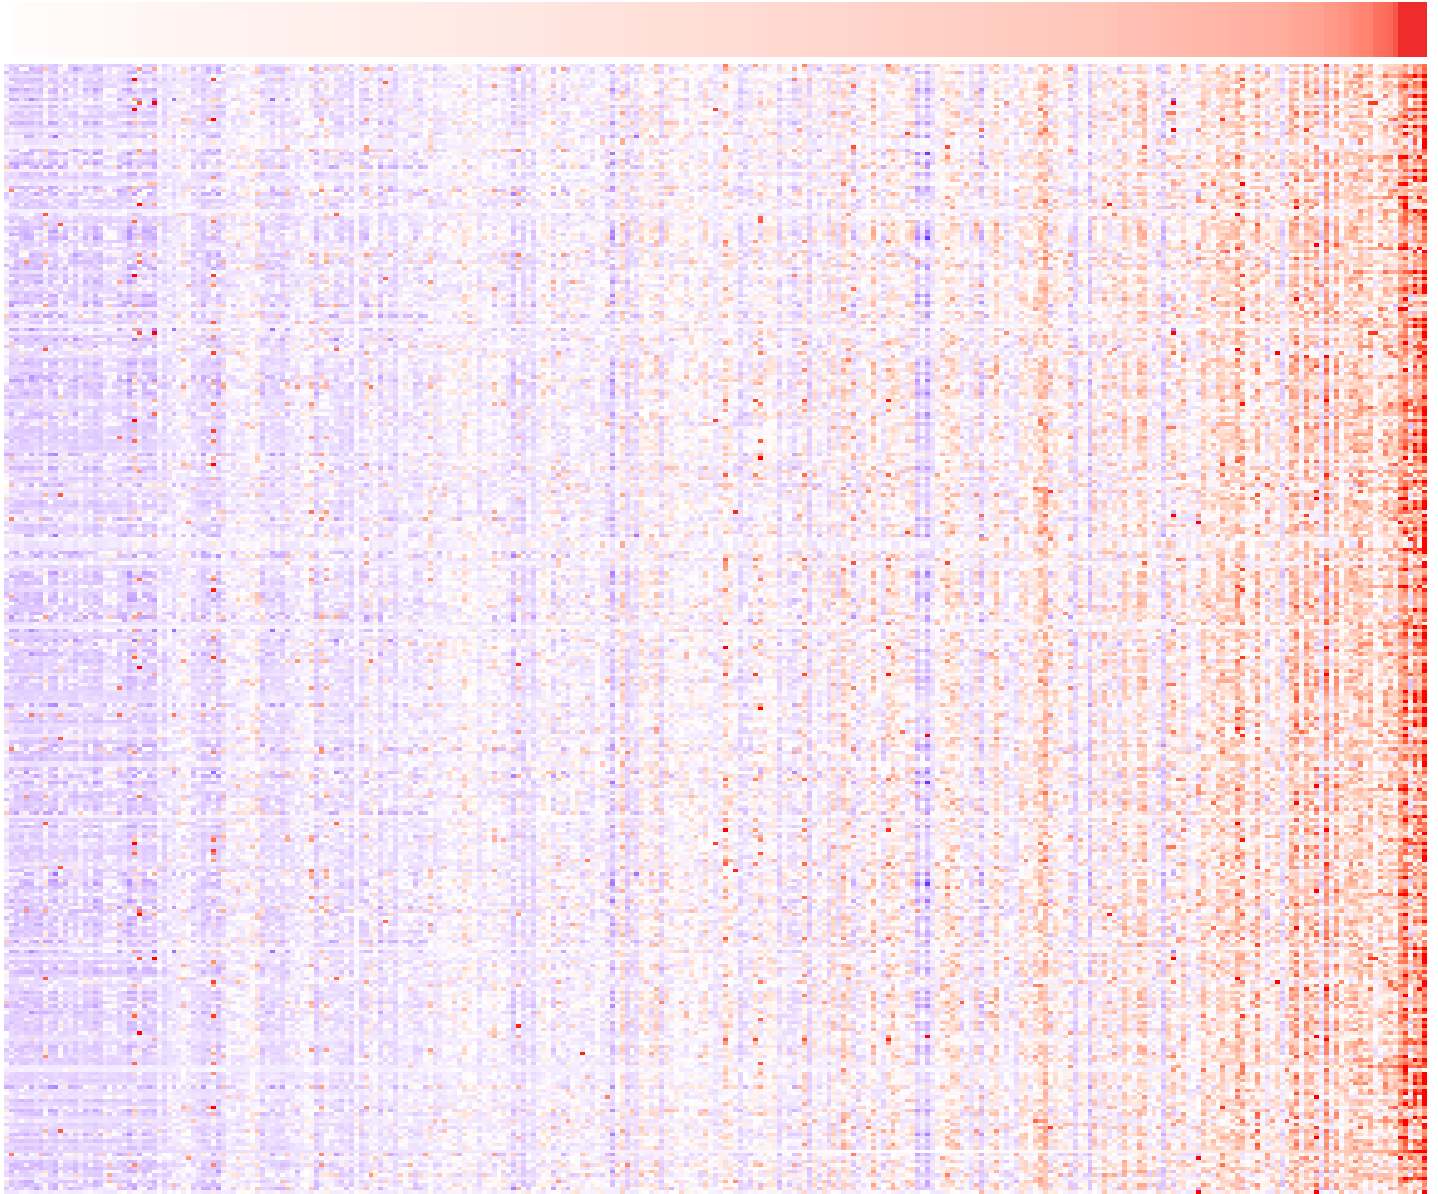

## go\_term

- activation of immune response
- complement-dependent cytotoxicity
- immune effector process
- immune system development
- leukocyte homeostasis
- leukocyte mediated cytotoxicity
- production of molecular mediator of immune response
- somatic diversification of immune receptors

## expression

- 4
- 2
- 0
- 2
- 4

# LAML

PD1

PD1

2

1.5

1

0.5

0

go\_term

activation of immune response

immune effector process

immune system development

leukocyte homeostasis

production of molecular mediator of immune response

expression

4

2

0

-2

-4

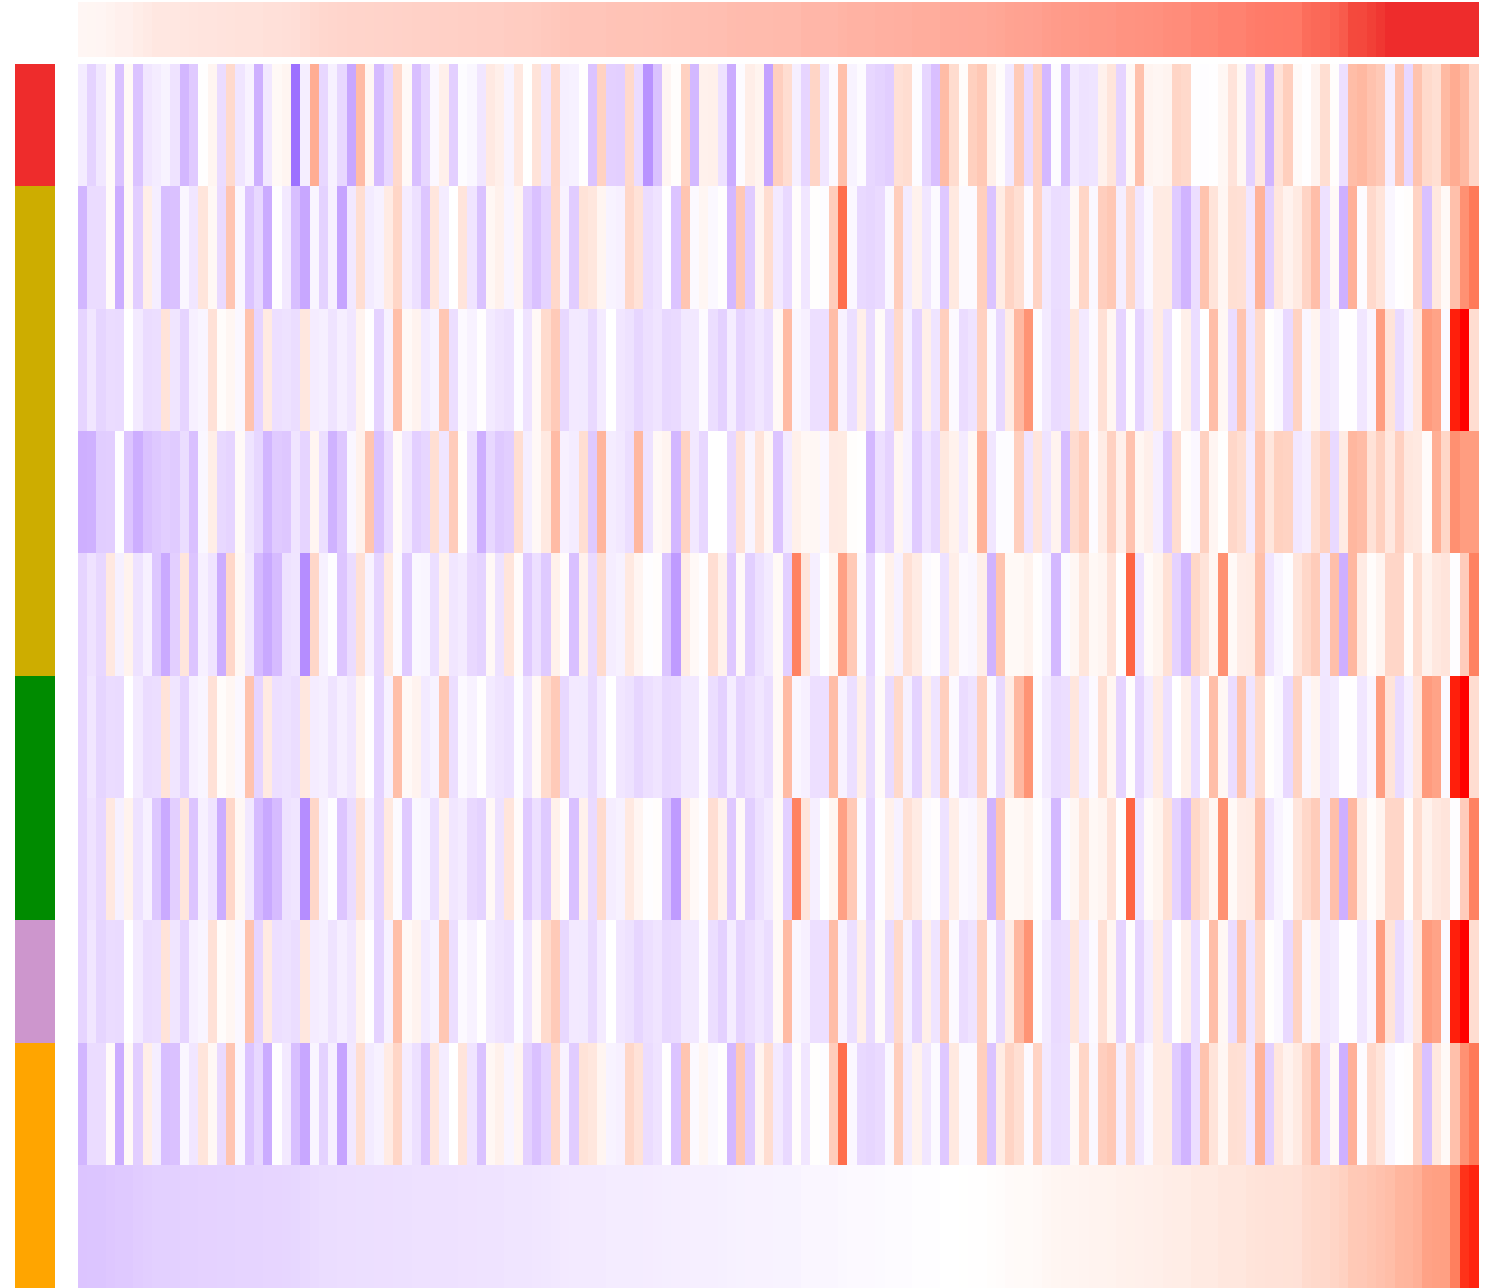



# LGG

PD1

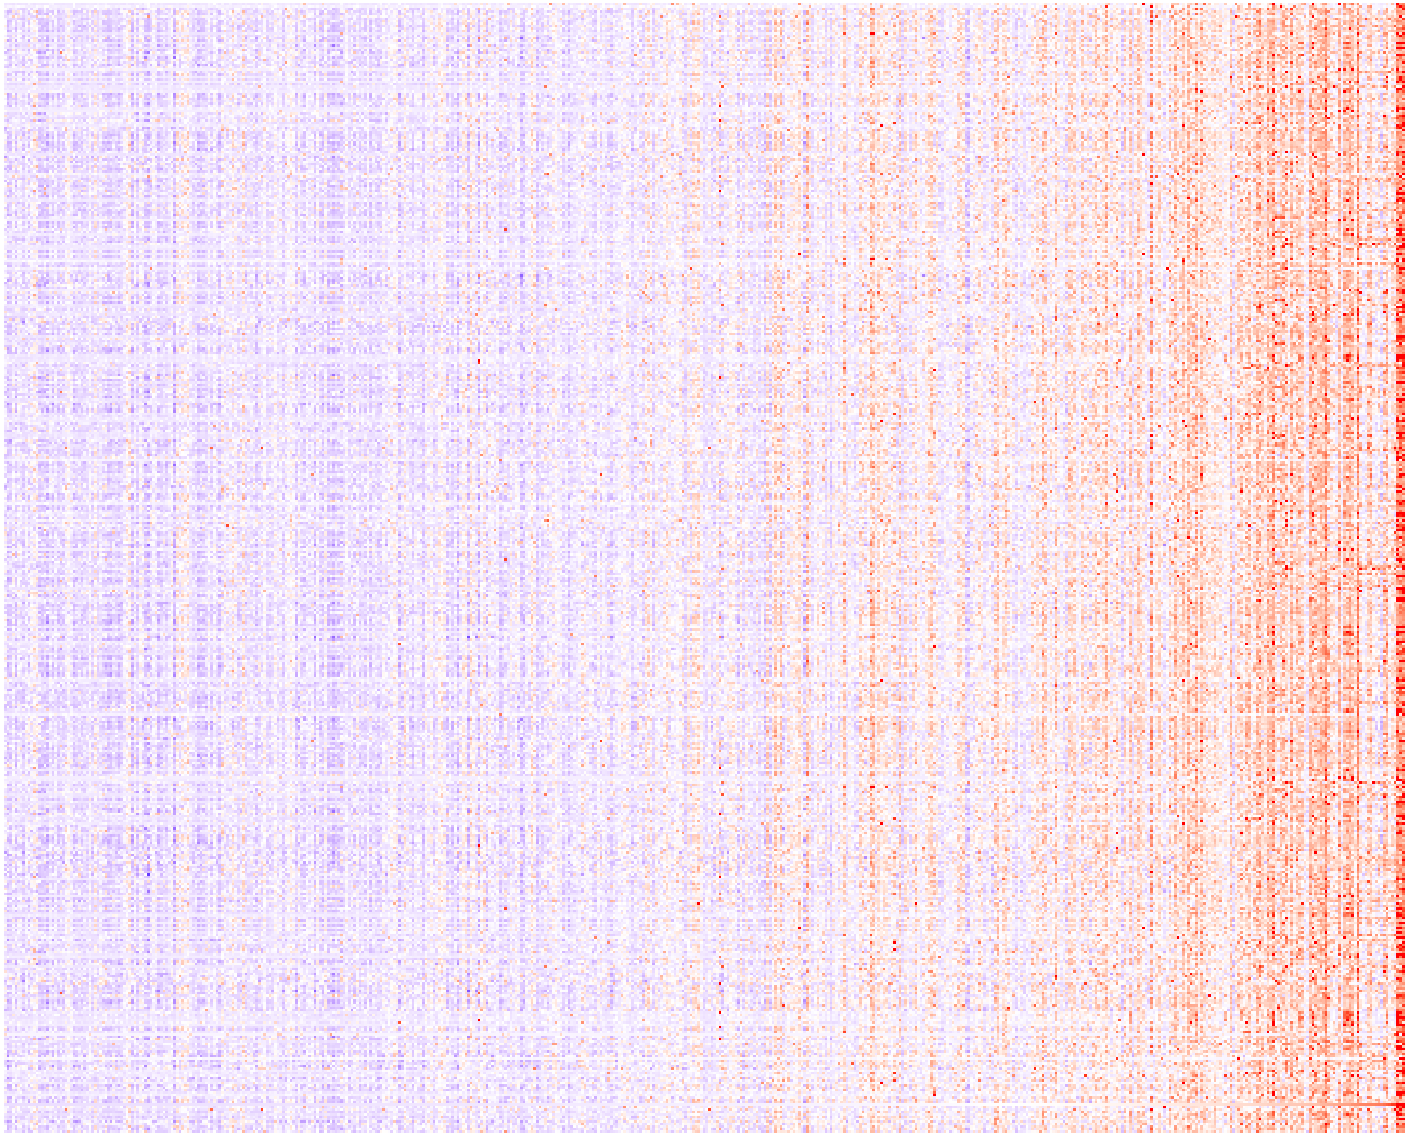

PD1

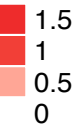

## go\_term

- activation of immune response
- complement-dependent cytotoxicity
- immune effector process
- immune system development
- leukocyte homeostasis
- leukocyte mediated cytotoxicity
- production of molecular mediator of immune response
- somatic diversification of immune receptors

## expression

- 4
- 2
- 0
- 2
- 4

# LIHC

PD1

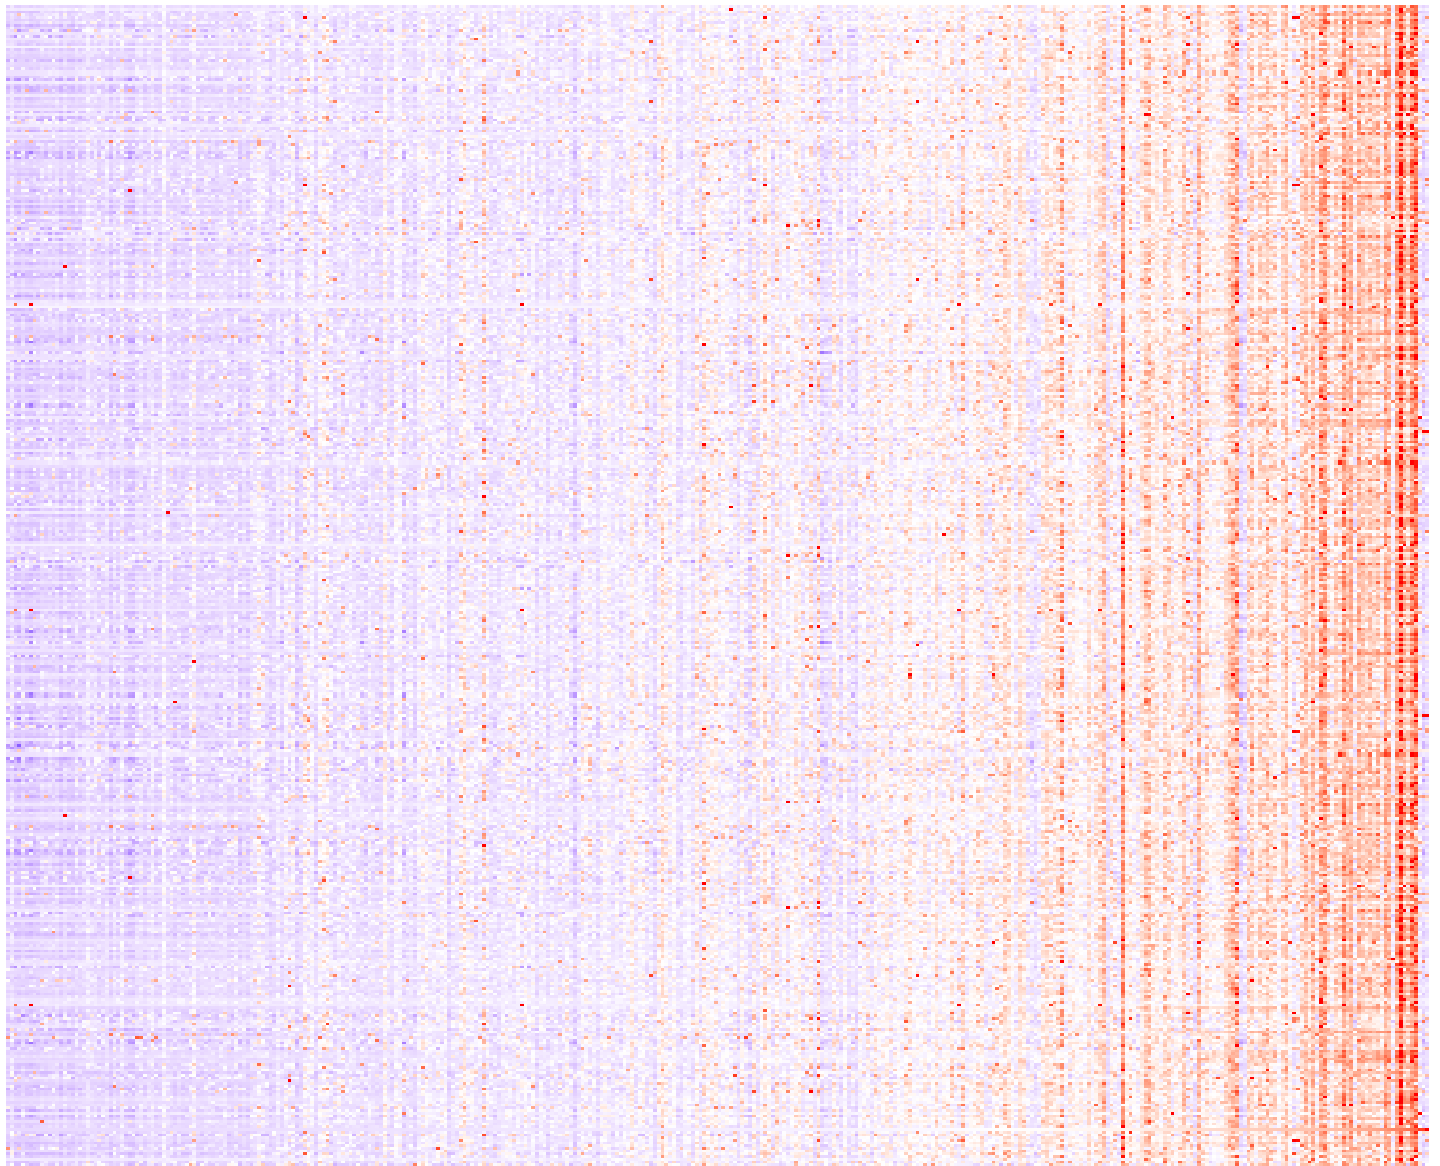

PD1  
3  
2  
1  
0

go\_term

- activation of immune response
- immune effector process
- immune system development
- leukocyte homeostasis
- leukocyte mediated cytotoxicity
- production of molecular mediator of immune response
- somatic diversification of immune receptors

expression

- 4
- 2
- 0
- 2
- 4

# LUAD

PD1

PD1

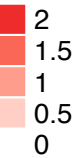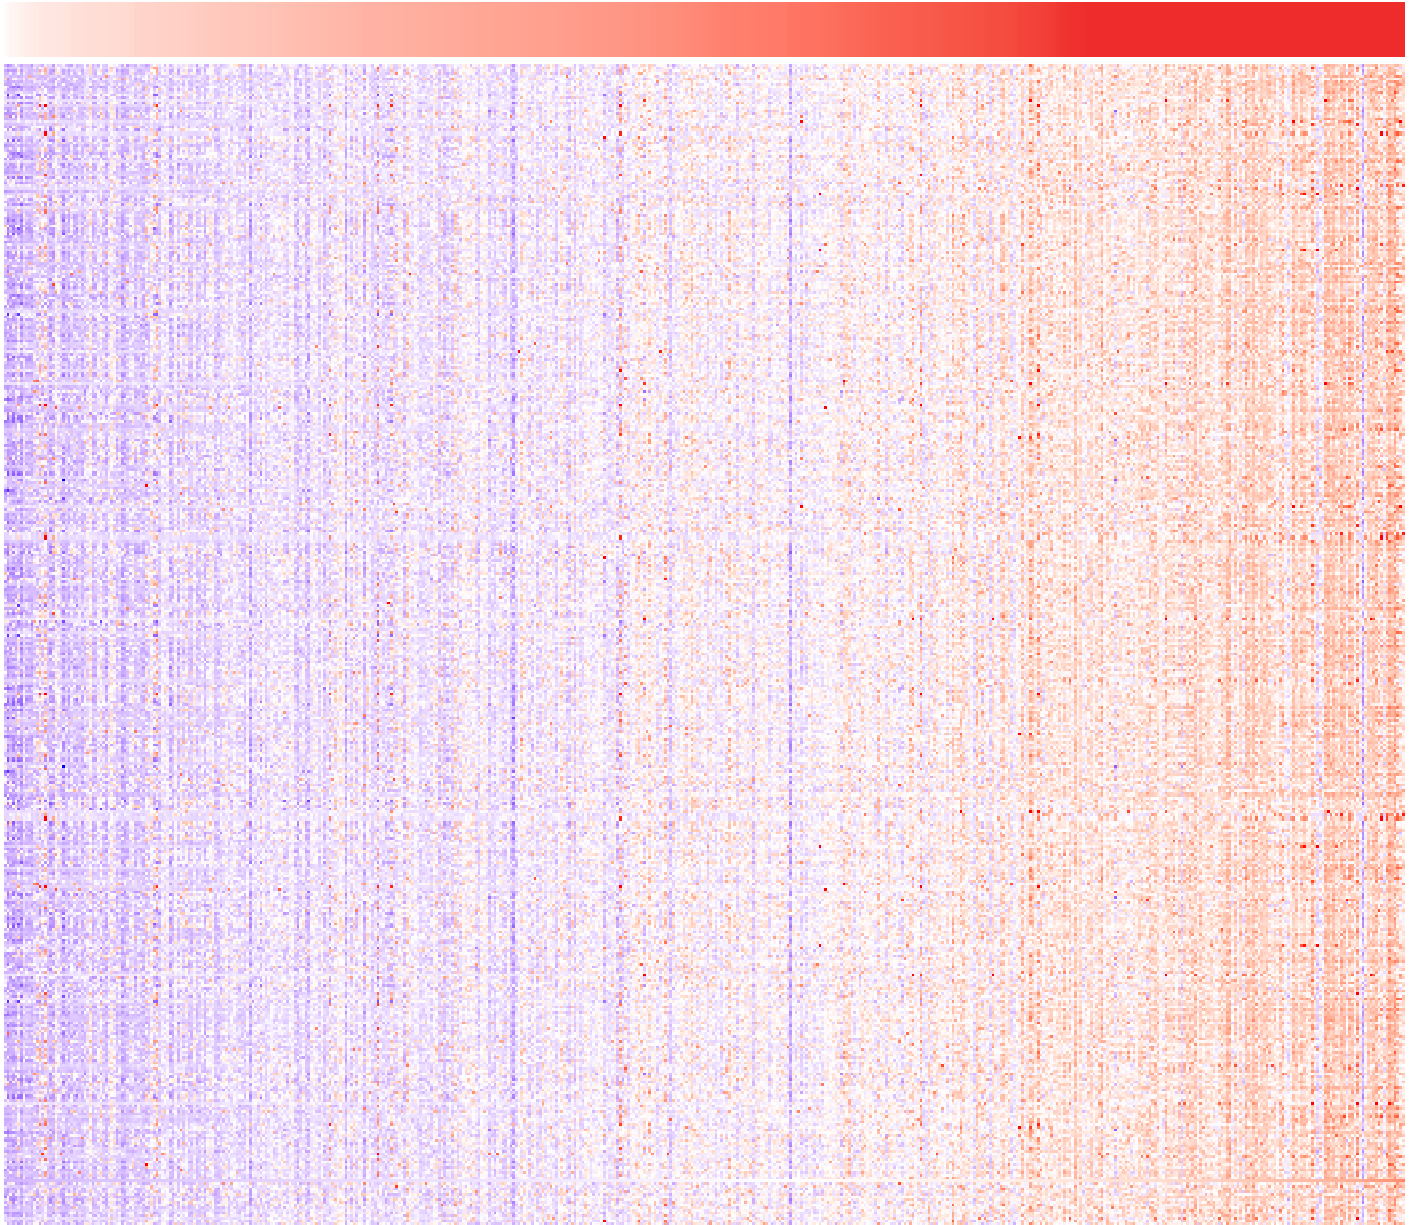

## go\_term

- activation of immune response
- immune effector process
- immune system development
- leukocyte homeostasis
- leukocyte mediated cytotoxicity
- production of molecular mediator of immune response
- somatic diversification of immune receptors

## expression

- 4
- 2
- 0
- 2
- 4

# LUSC

PD1

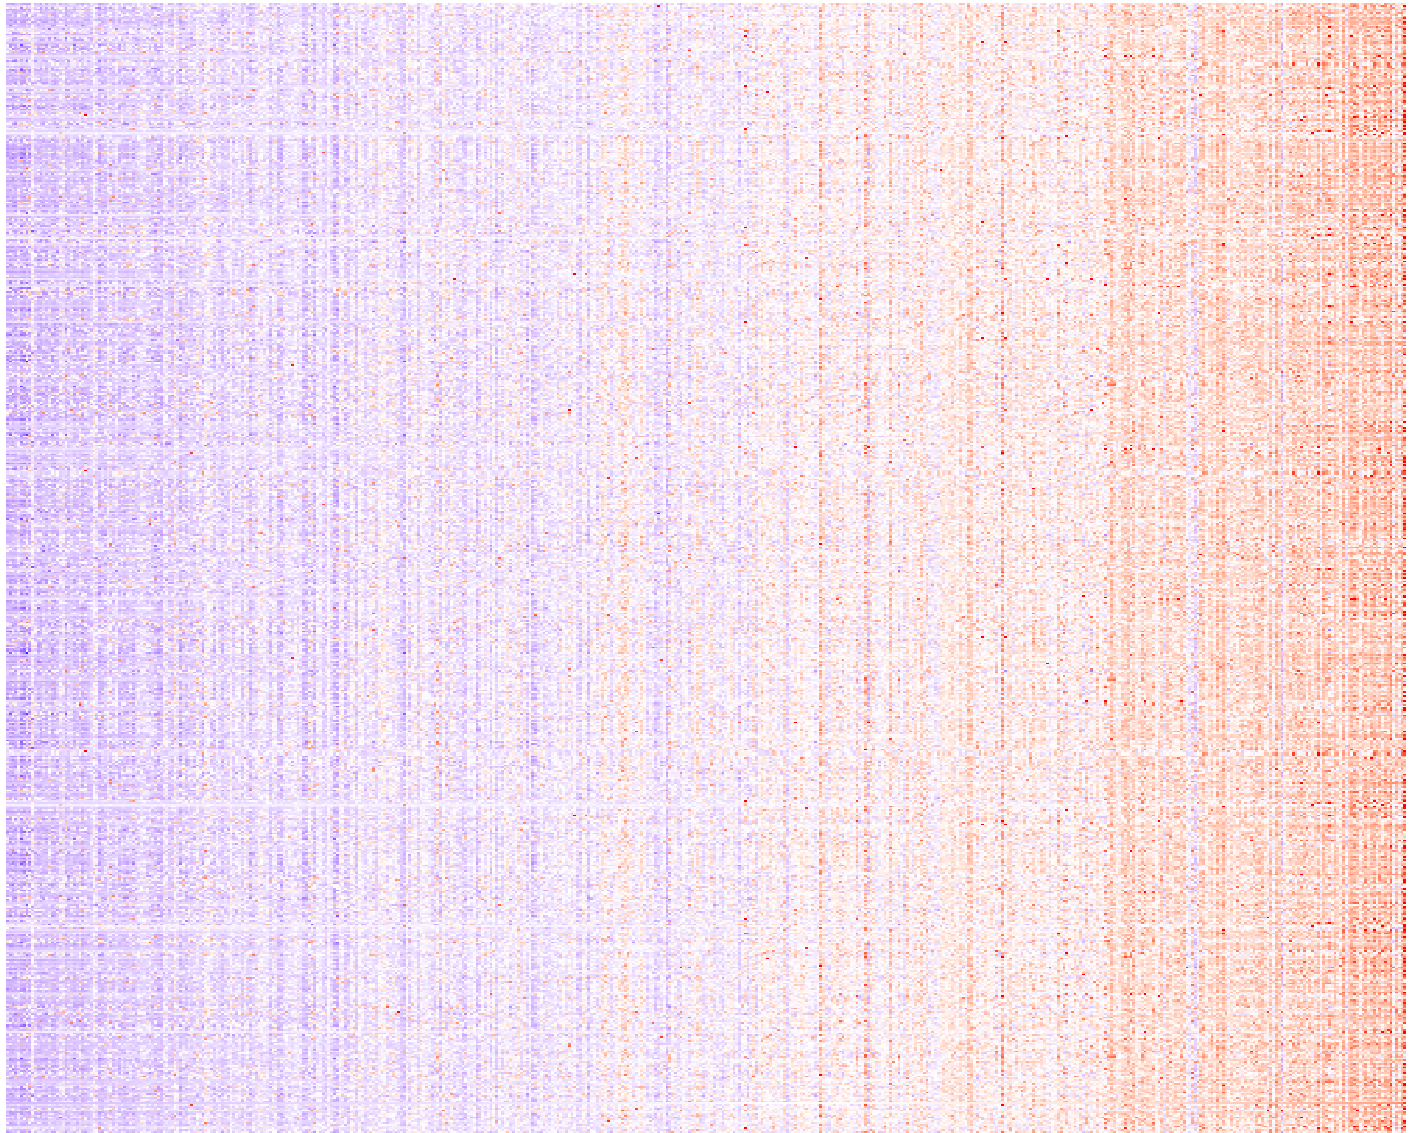

PD1

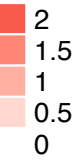

## go\_term

- activation of immune response
- complement-dependent cytotoxicity
- immune effector process
- immune system development
- leukocyte homeostasis
- leukocyte mediated cytotoxicity
- production of molecular mediator of immune response
- somatic diversification of immune receptors

## expression

- 4
- 2
- 0
- 2
- 4

# MESO

PD1

PD1  
3  
2  
1  
0

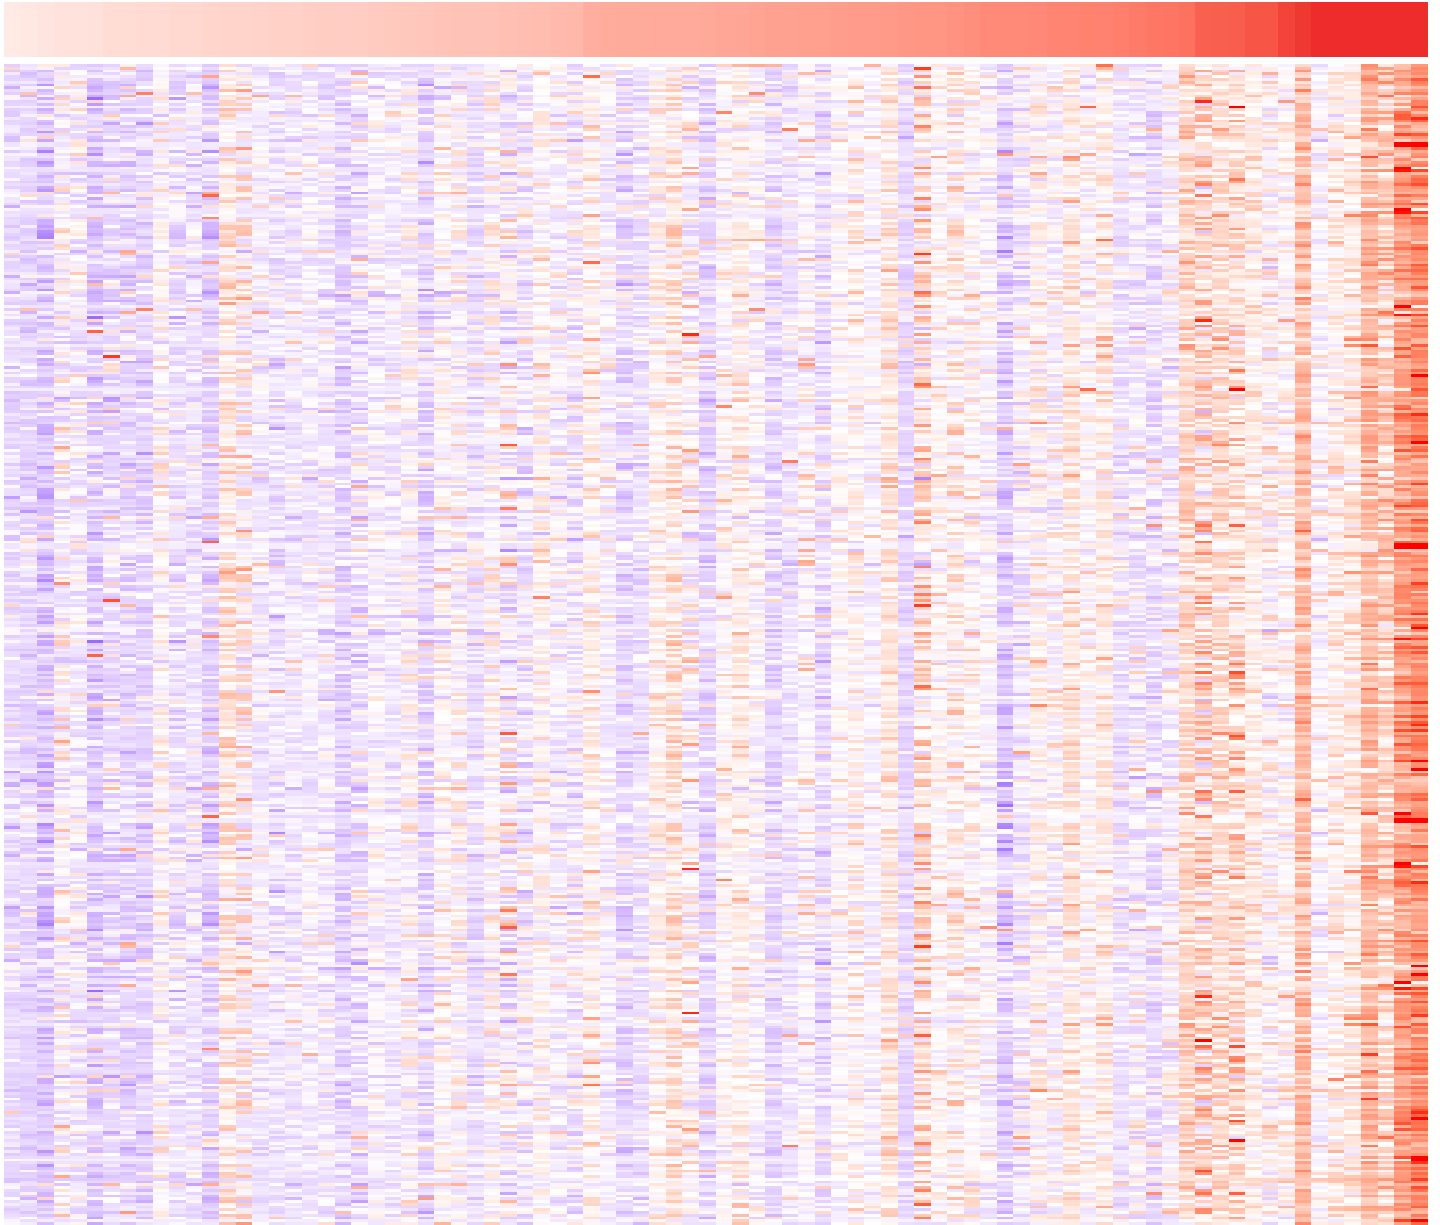

## go\_term

- activation of immune response
- immune effector process
- immune system development
- leukocyte homeostasis
- leukocyte mediated cytotoxicity
- production of molecular mediator of immune response
- somatic diversification of immune receptors

## expression

- 4
- 2
- 0
- 2
- 4



OV

PD1

PD1

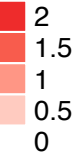

go\_term

- activation of immune response
- immune effector process
- immune system development
- leukocyte homeostasis
- leukocyte mediated cytotoxicity
- production of molecular mediator of immune response
- somatic diversification of immune receptors

expression

- 4
- 2
- 0
- 2
- 4

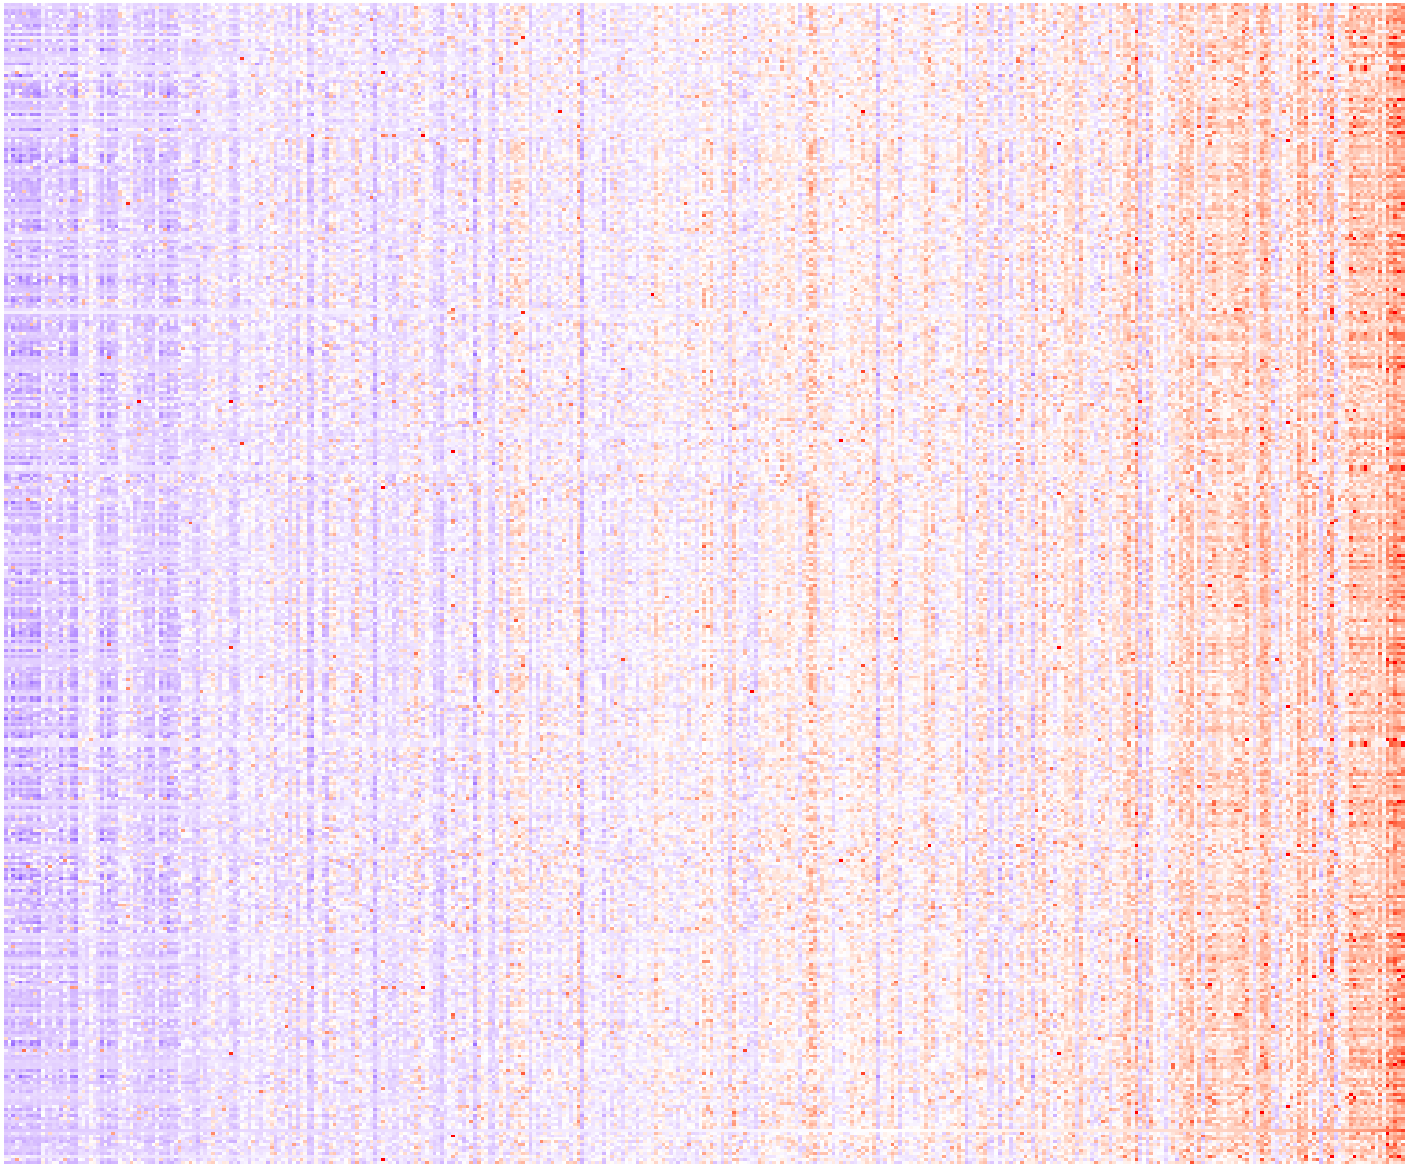

# PAAD

PD1

PD1

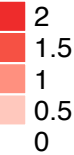

## go\_term

- activation of immune response
- immune effector process
- immune system development
- leukocyte homeostasis
- leukocyte mediated cytotoxicity
- production of molecular mediator of immune response
- somatic diversification of immune receptors

## expression

- 4
- 2
- 0
- 2
- 4

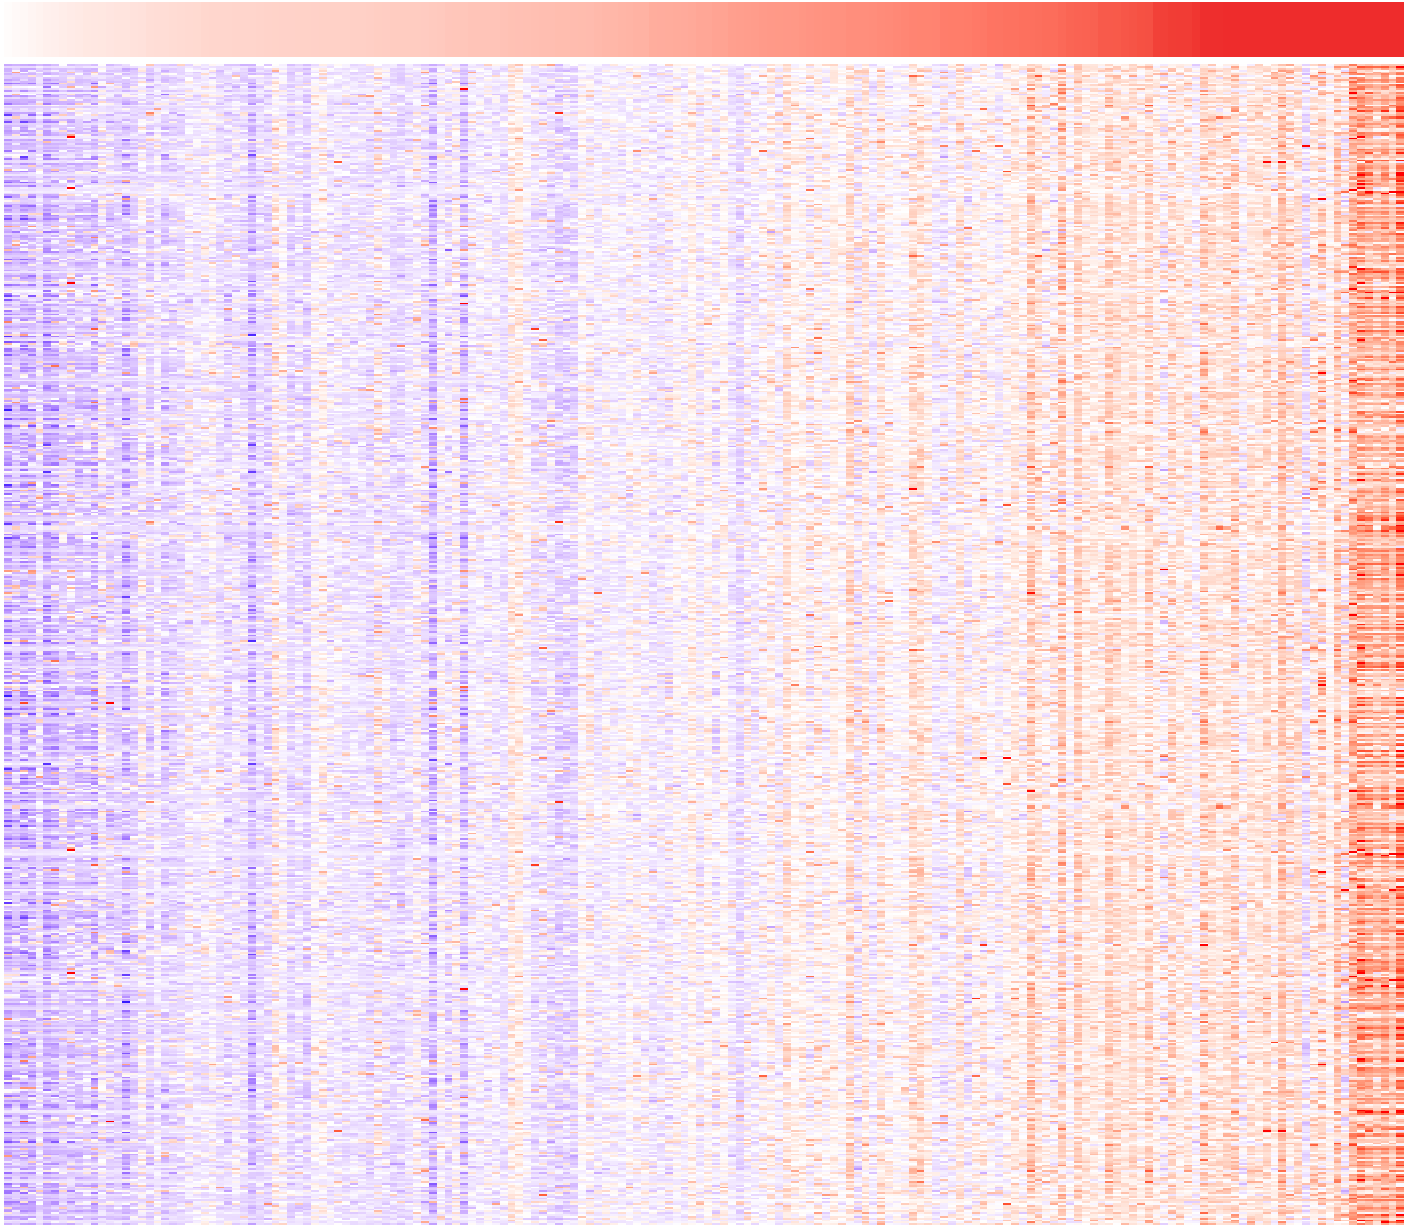

# PCPG

PD1

PD1

0.8  
0.6  
0.4  
0.2  
0

go\_term

- activation of immune response
- immune effector process
- immune system development
- leukocyte homeostasis
- leukocyte mediated cytotoxicity
- production of molecular mediator of immune response
- somatic diversification of immune receptors

expression

- 4
- 2
- 0
- 2
- 4

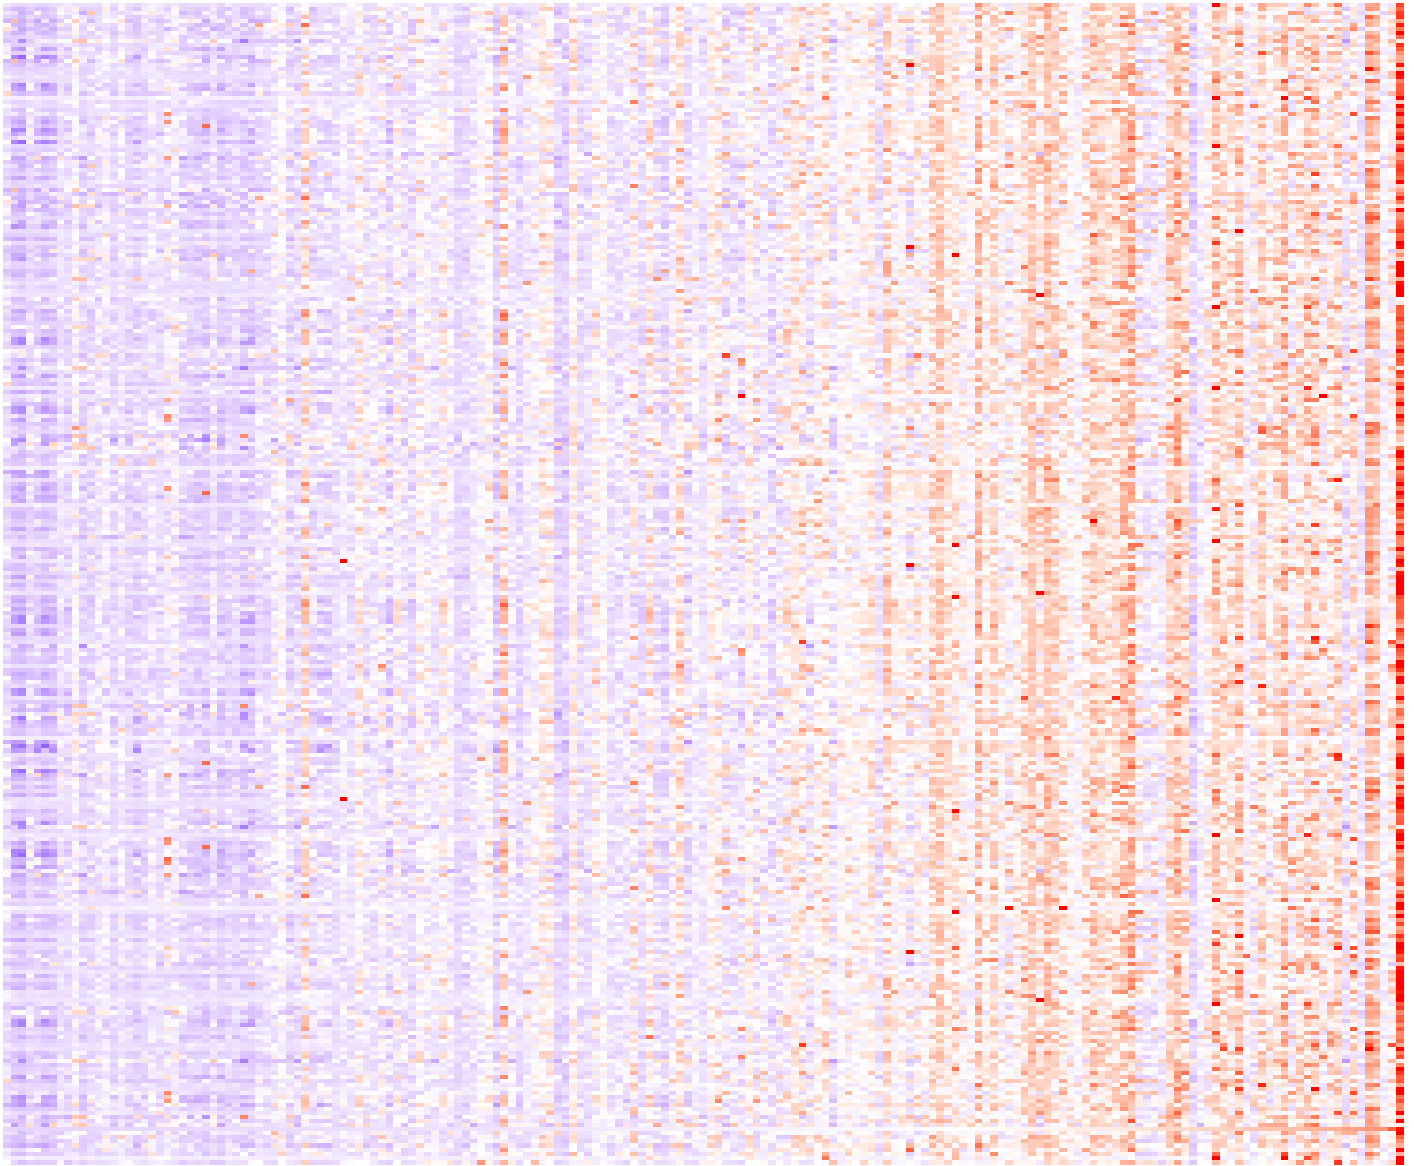

# PRAD

PD1

PD1

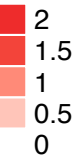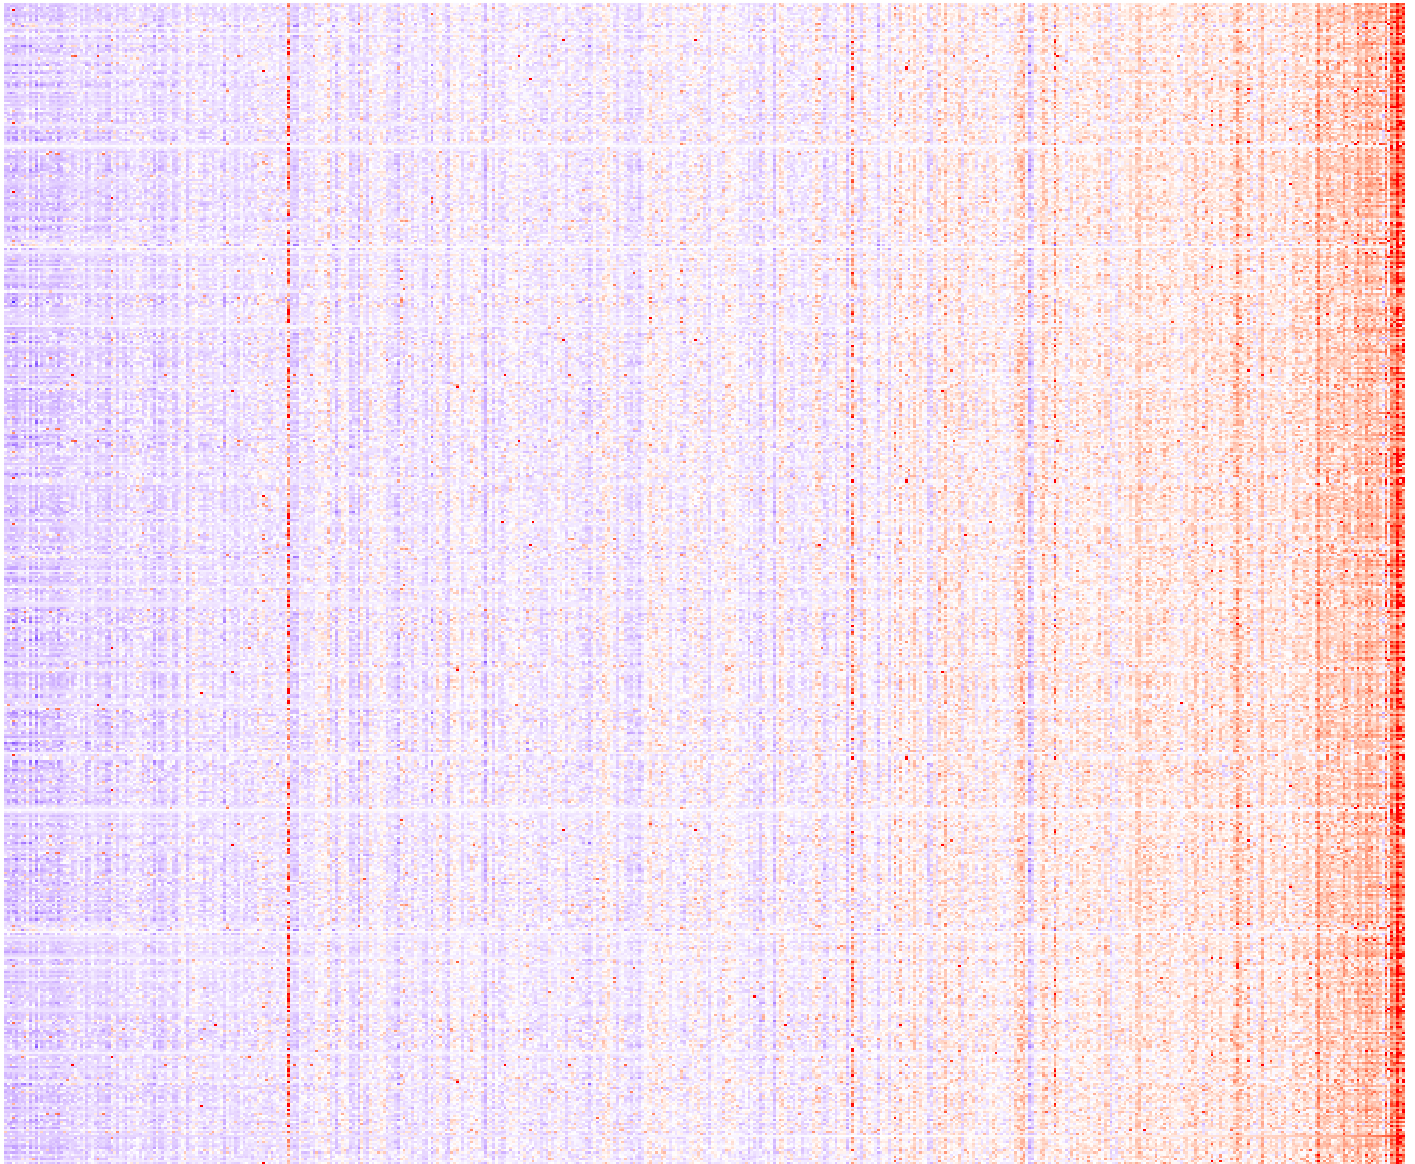

## go\_term

- activation of immune response
- immune effector process
- immune system development
- leukocyte homeostasis
- leukocyte mediated cytotoxicity
- production of molecular mediator of immune response
- somatic diversification of immune receptors

## expression

- 4
- 2
- 0
- 2
- 4

# READ

PD1

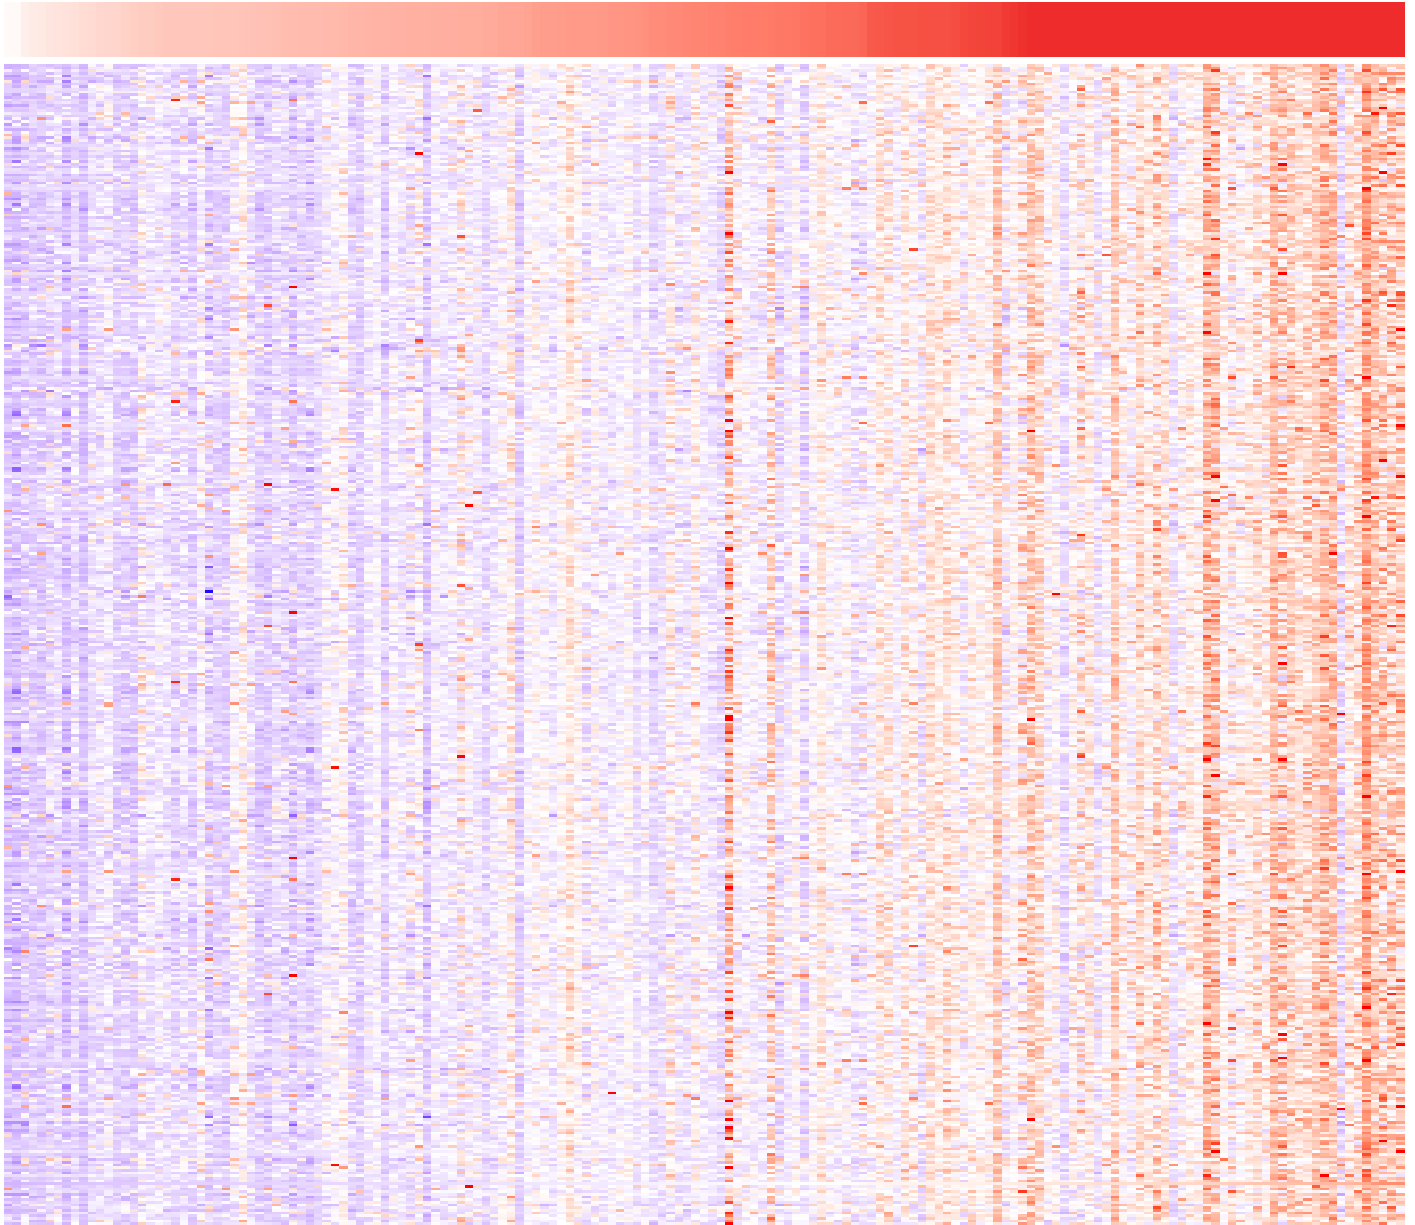

PD1

0.8  
0.6  
0.4  
0.2  
0

## go\_term

- activation of immune response
- immune effector process
- immune system development
- leukocyte homeostasis
- leukocyte mediated cytotoxicity
- production of molecular mediator of immune response
- somatic diversification of immune receptors

## expression

- 4
- 2
- 0
- 2
- 4



# SARC

PD1

PD1  
3  
2  
1  
0

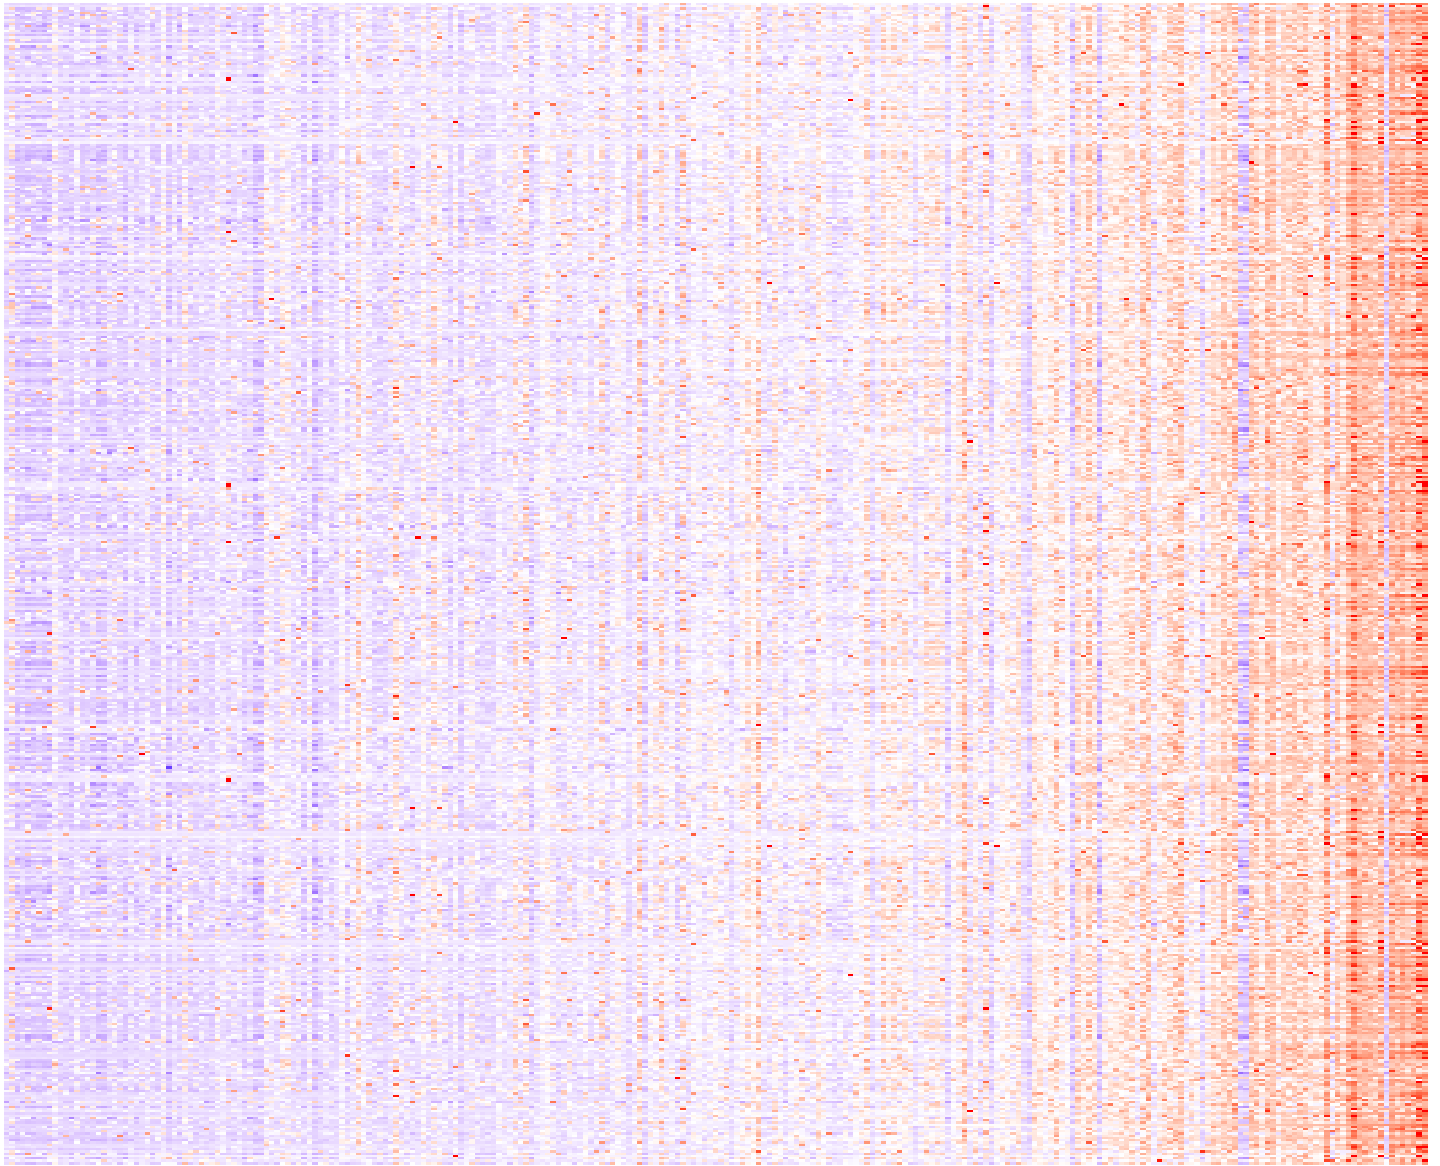

## go\_term

- activation of immune response
- immune effector process
- immune system development
- leukocyte homeostasis
- leukocyte mediated cytotoxicity
- production of molecular mediator of immune response
- somatic diversification of immune receptors

## expression

- 4
- 2
- 0
- 2
- 4

# SKCM

PD1

PD1  
3  
2  
1  
0

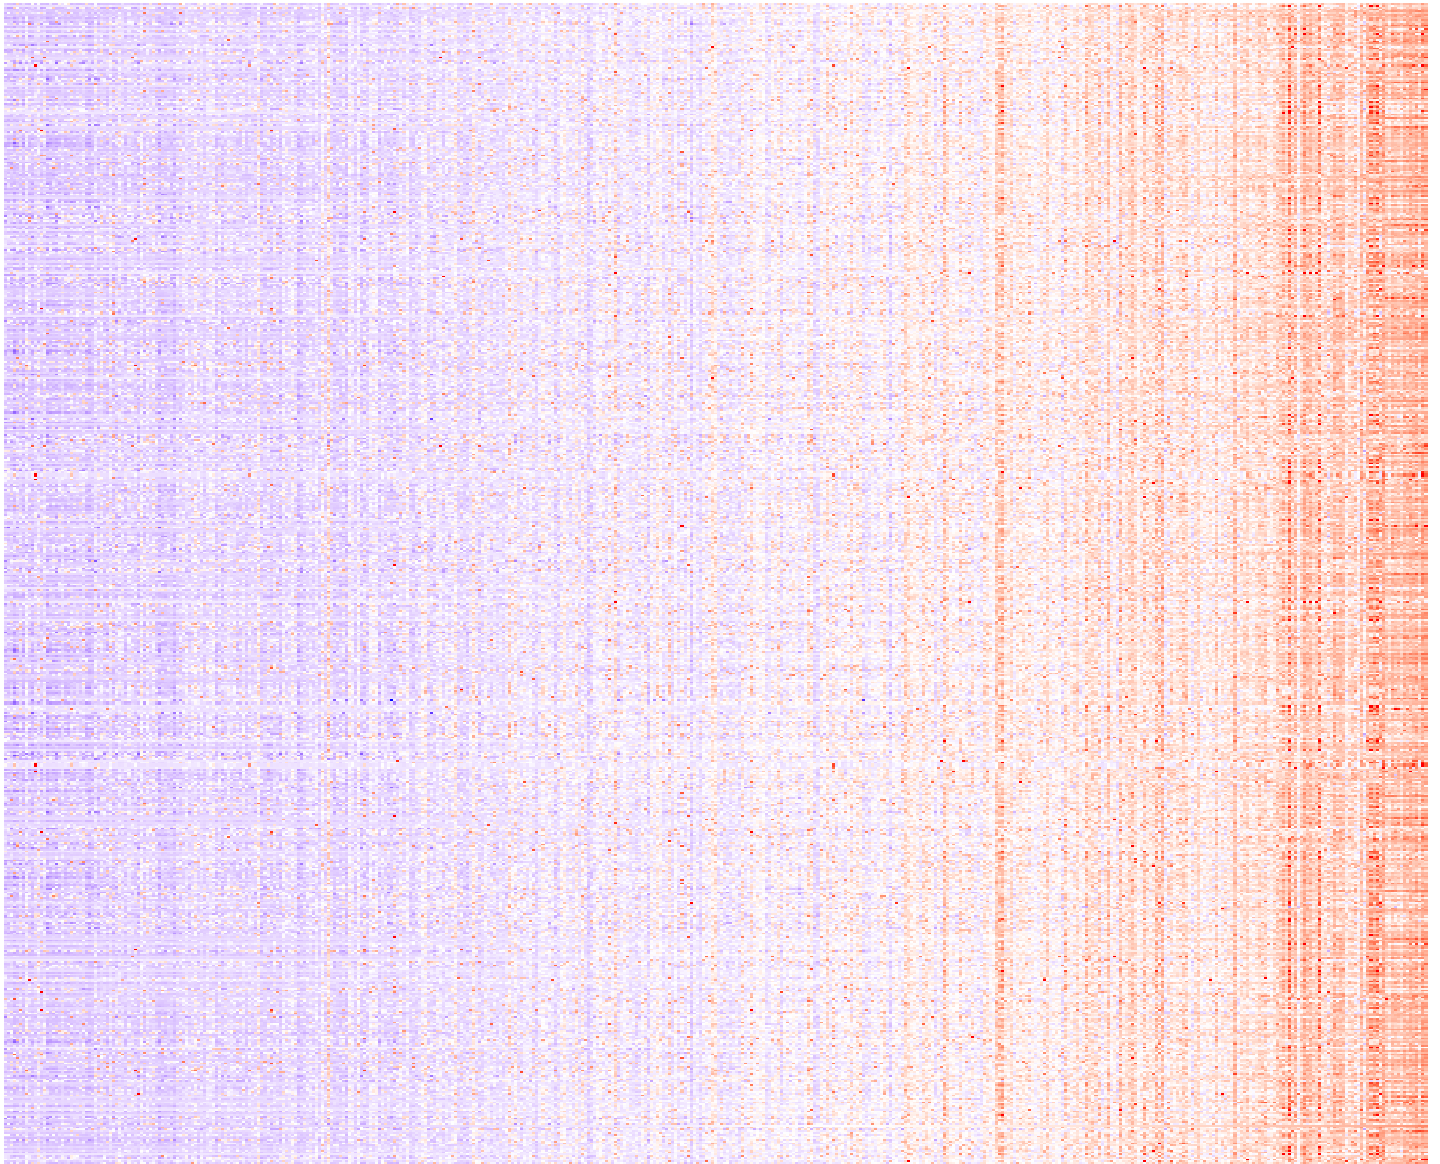

## go\_term

- activation of immune response
- immune effector process
- immune system development
- leukocyte homeostasis
- leukocyte mediated cytotoxicity
- production of molecular mediator of immune response
- somatic diversification of immune receptors

## expression

- 4
- 2
- 0
- 2
- 4

# STAD

PD1

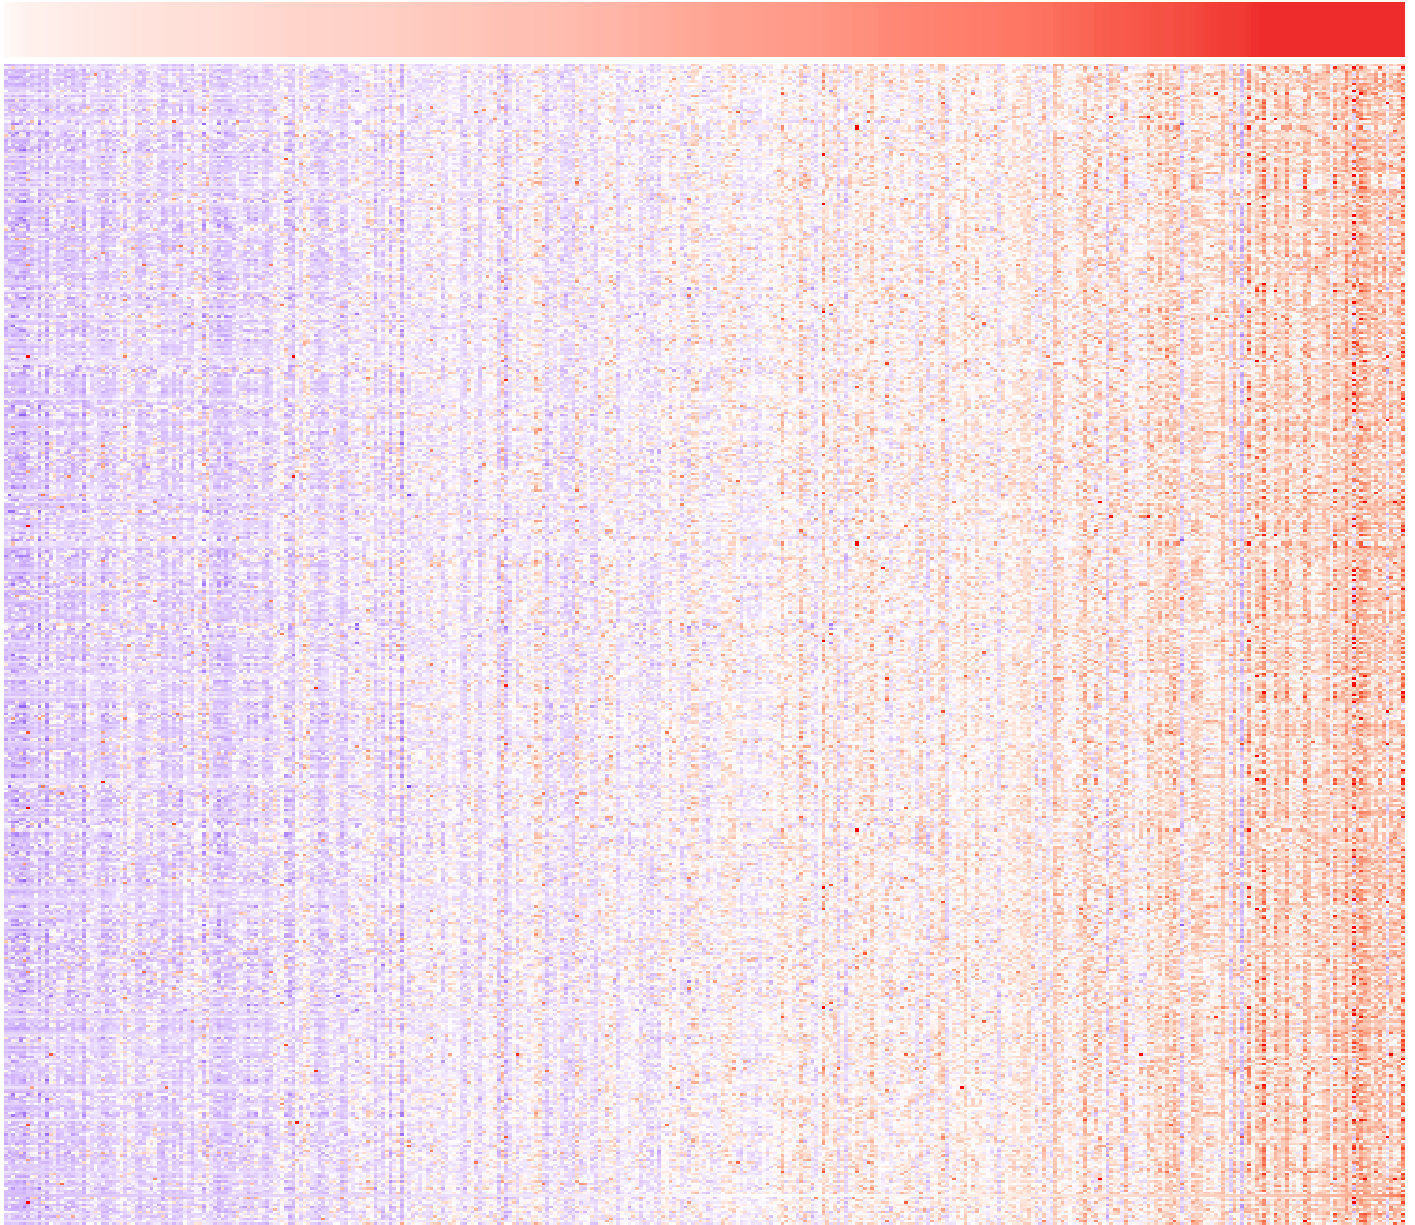

PD1

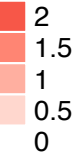

## go\_term

- activation of immune response
- immune effector process
- immune system development
- leukocyte homeostasis
- leukocyte mediated cytotoxicity
- production of molecular mediator of immune response
- somatic diversification of immune receptors

## expression

- 4
- 2
- 0
- 2
- 4

# TGCT

PD1

PD1

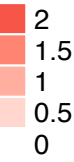

## go\_term

- activation of immune response
- complement-dependent cytotoxicity
- immune effector process
- immune system development
- leukocyte homeostasis
- leukocyte mediated cytotoxicity
- production of molecular mediator of immune response
- somatic diversification of immune receptors

## expression

- 4
- 2
- 0
- 2
- 4

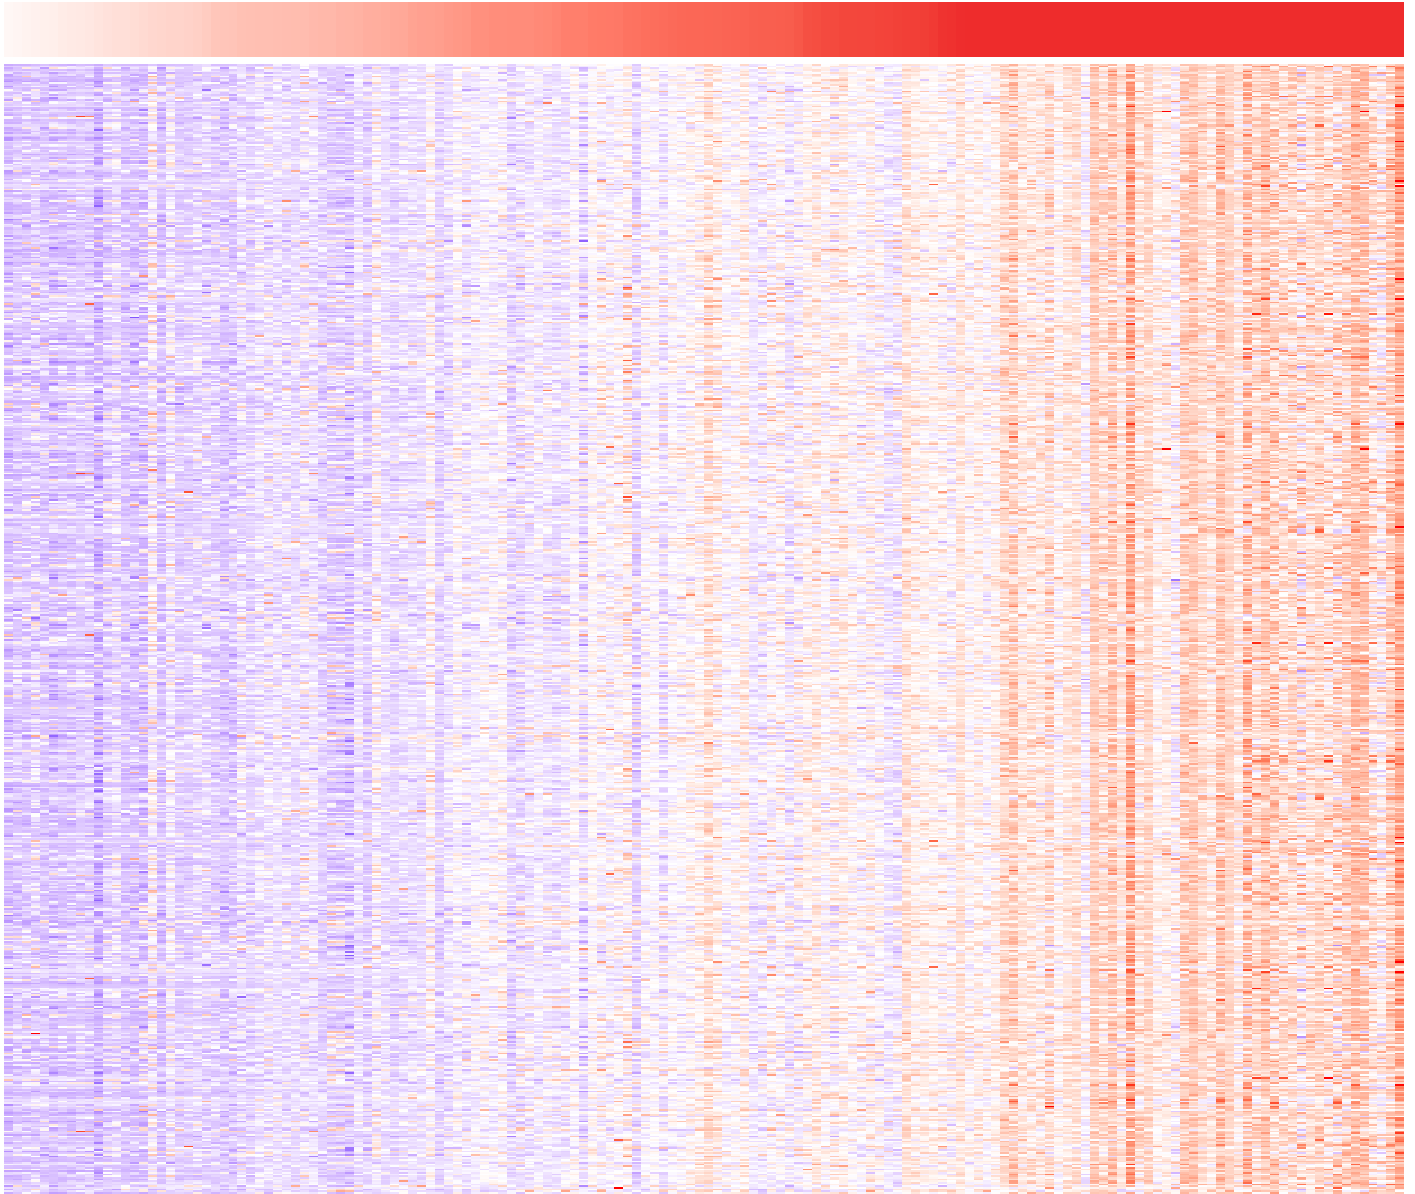

# THCA

PD1

PD1  
3  
2  
1  
0

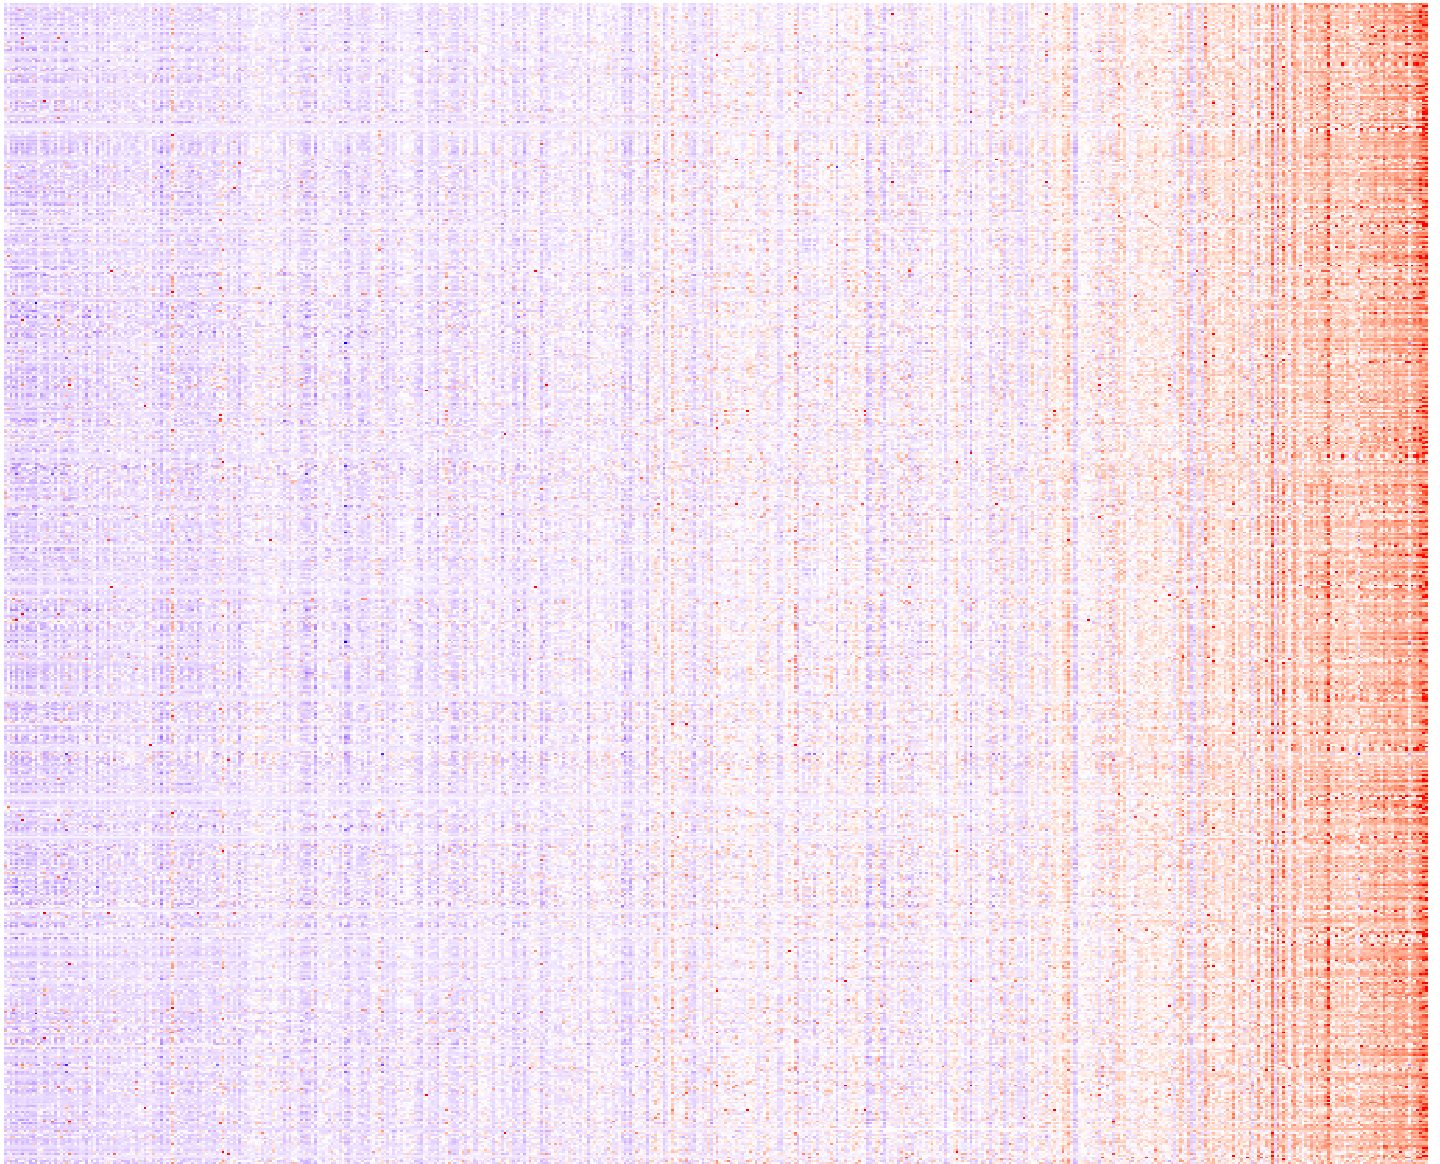

## go\_term

- activation of immune response
- immune effector process
- immune system development
- leukocyte homeostasis
- leukocyte mediated cytotoxicity
- production of molecular mediator of immune response
- somatic diversification of immune receptors

## expression

- 4
- 2
- 0
- 2
- 4

# THYM

PD1

PD1

2  
1.5  
1  
0.5  
0

go\_term

- activation of immune response
- immune effector process
- immune system development
- leukocyte homeostasis
- leukocyte mediated cytotoxicity
- production of molecular mediator of immune response
- somatic diversification of immune receptors

expression

- 4
- 2
- 0
- 2
- 4

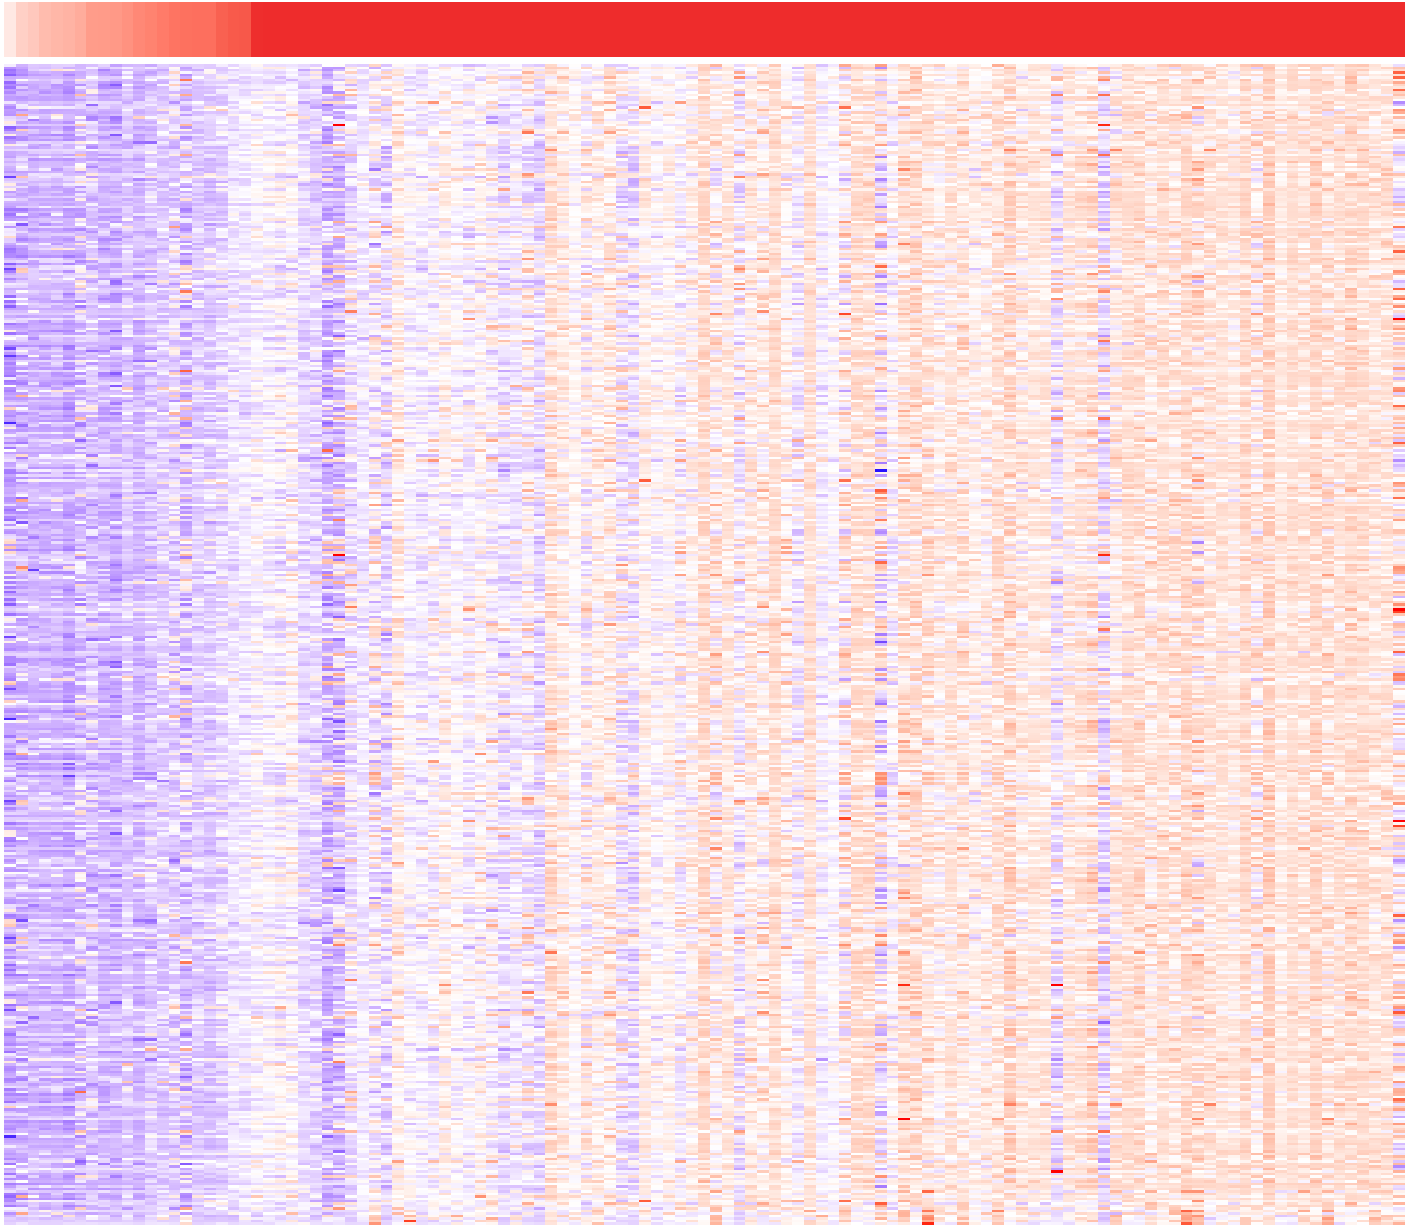



# UCEC

PD1

PD1

3  
2  
1  
0

## go\_term

- activation of immune response
- immune effector process
- immune system development
- leukocyte homeostasis
- leukocyte mediated cytotoxicity
- production of molecular mediator of immune response
- somatic diversification of immune receptors

## expression

- 4
- 2
- 0
- 2
- 4

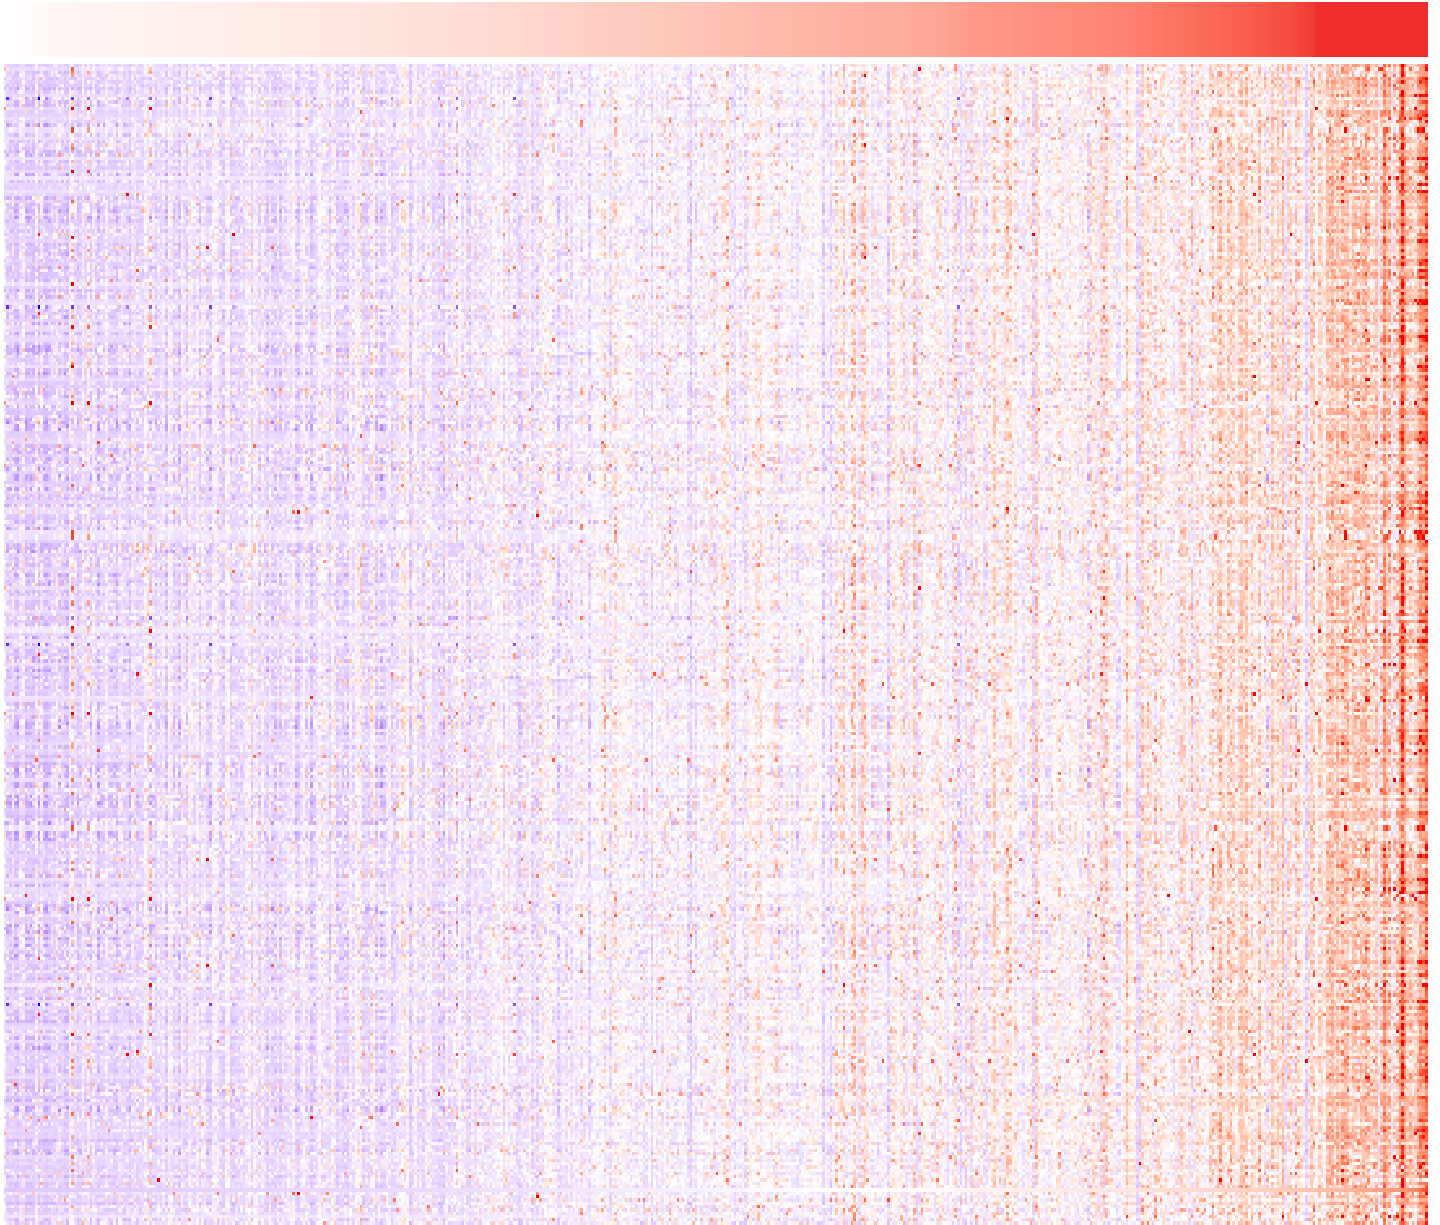



UCS

PD1

PD1

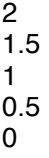

go\_term

- activation of immune response
- immune effector process
- immune system development
- leukocyte homeostasis
- leukocyte mediated cytotoxicity
- production of molecular mediator of immune response
- somatic diversification of immune receptors

expression

- 4
- 2
- 0
- 2
- 4

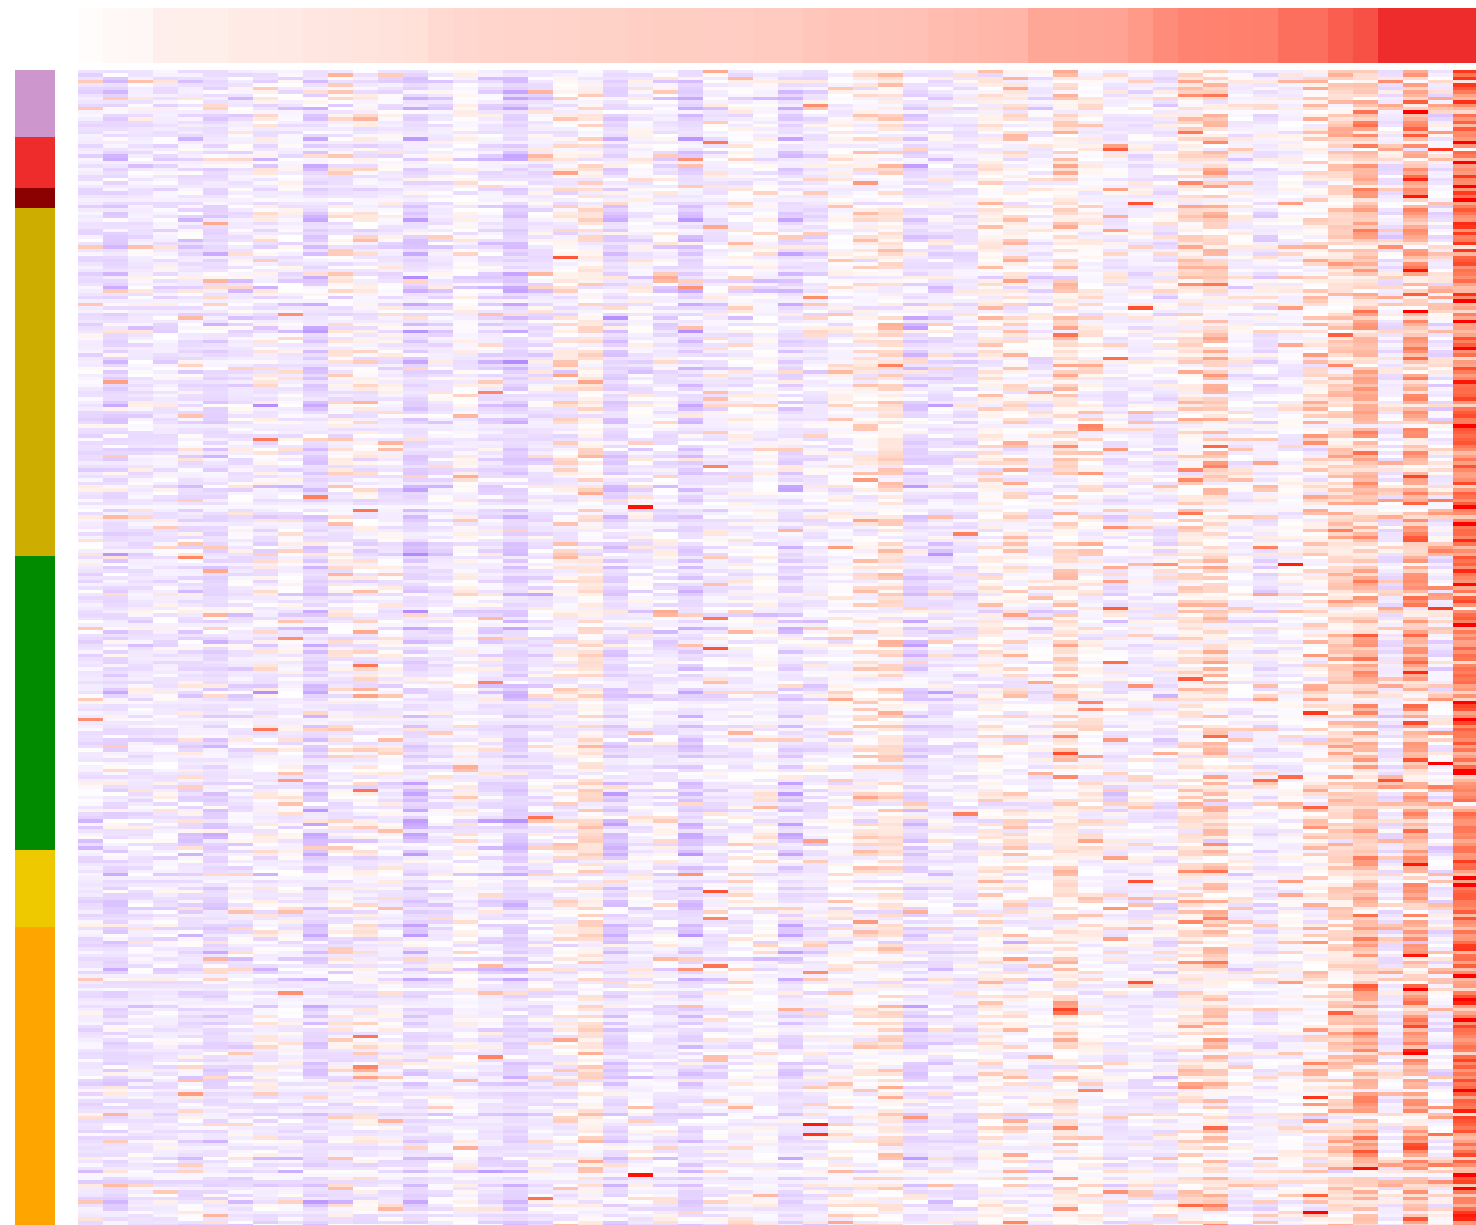

UVM

PD1

PD1

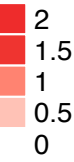

go\_term

- activation of immune response
- complement-dependent cytotoxicity
- immune effector process
- immune system development
- leukocyte homeostasis
- leukocyte mediated cytotoxicity
- production of molecular mediator of immune response
- somatic diversification of immune receptors

expression

- 4
- 2
- 0
- 2
- 4

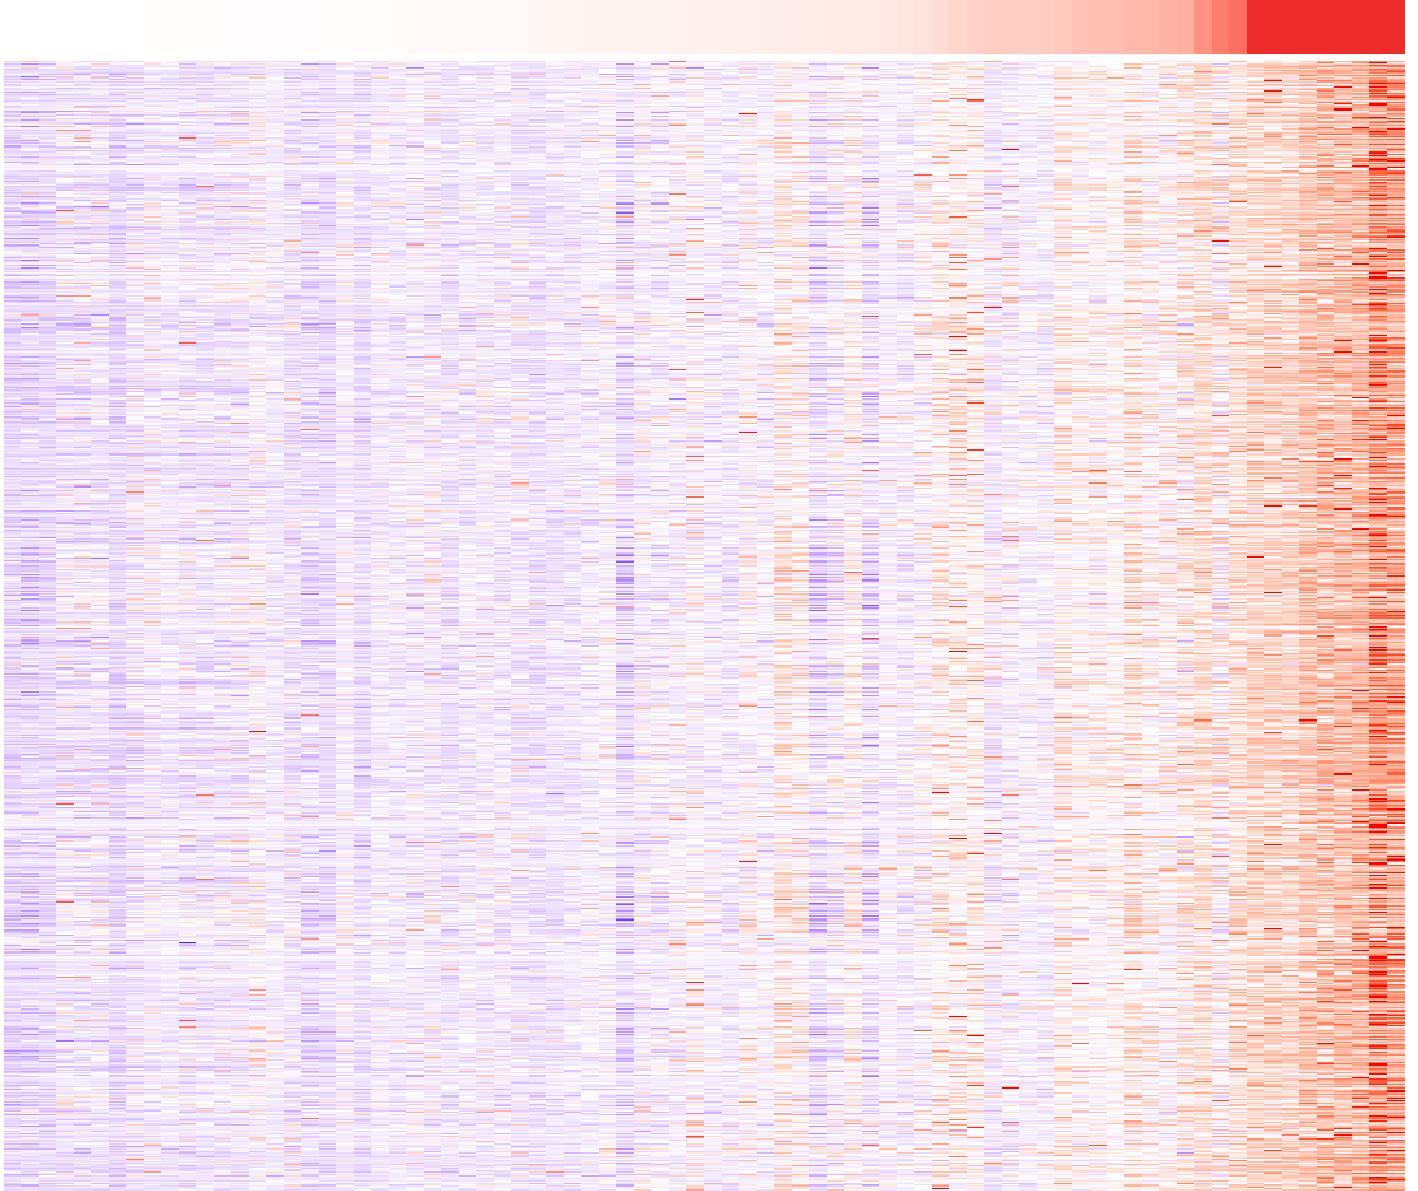

Supplement: MOESM4 [file 16359760]
