# Supplementary material for: Analysis of PD-1 related immune transcriptional profile in different cancer types
Source: PubMed Central journal article supplement (PMC6307327; doi:10.1186/s12935-018-0712-y), 2018-12-27
Supplement: 12935_2018_712_MOESM2_ESM.pdf [file 12935_2018_712_MOESM2_ESM.pdf]

5  
4  
3  
2  
1  
0

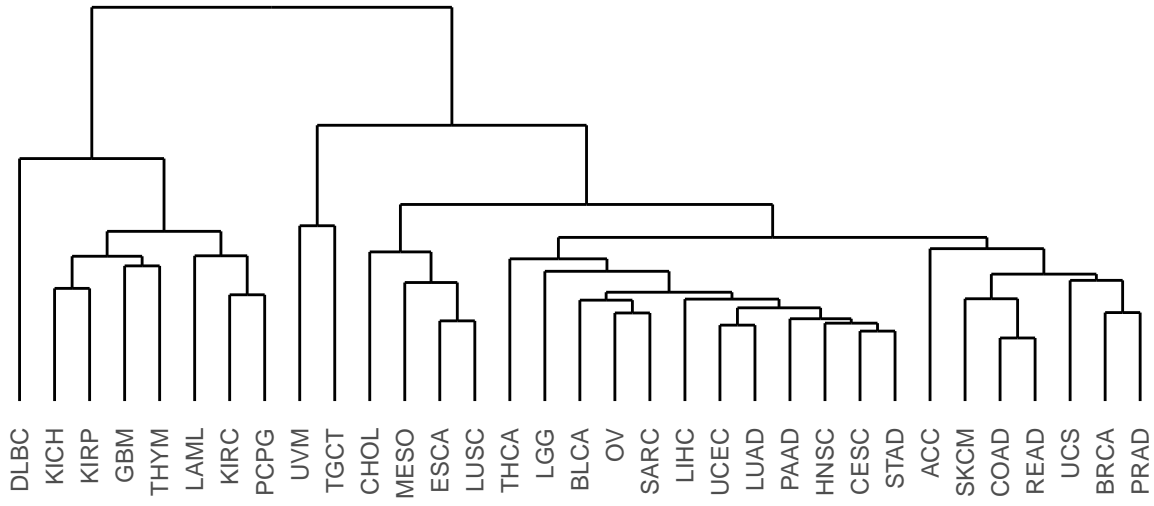

ENTPD 1  
HMGB 1  
ARG1  
PRF1  
GZMA  
IDO1  
HLA.D PA1  
HLA.D PB1  
HLA.D RB1  
HLA.D RA  
HLA.C  
HLA.A  
HLA.B  
HLA.D QB2  
HLA.D QA2  
MICB  
MICA  
HLA.D QB1  
HLA.D QA1  
HLA.D RB5  
SELP  
ICAM1  
ITGB2  
HAVCR 2  
TLR4  
ADORA2A  
CD40  
EDNRB  
TNFRSF 14  
KIR2DL1  
KIR2DL3  
BTLA  
ICOS  
TNFRSF 9  
LAG3  
CD27  
TNFRSF 4  
IL2RA  
CTLA4  
PDCD1  
TIGIT  
TNFRSF 18  
IL13  
IL2  
IL4  
IFNA1  
IFNA2  
IL12A  
IL1A  
IFNG  
IL10  
CD40LG  
CD70  
VEGFA  
TGFB1  
CXCL1  
CXCL10  
CXCL9  
IL1B  
TNFSF 4  
TNF  
TNFSF 9  
CD276  
C10orf54  
BTN3A1  
BTN3A2  
SLAMF 7  
VTCN1  
PDCD1 LG2  
ICOSLG  
CD28  
CD80

|        |        |        |        |        |        |        |        |        |        |        |        |        |        |        |        |        |        |        |        |        |        |        |        |        |        |        |        |       |        |        |       |       |
|--------|--------|--------|--------|--------|--------|--------|--------|--------|--------|--------|--------|--------|--------|--------|--------|--------|--------|--------|--------|--------|--------|--------|--------|--------|--------|--------|--------|-------|--------|--------|-------|-------|
| 0.513  | 0.227  | -0.041 | 0.13   | 0.12   | 0.156  | 0.065  | -0.095 | -0.028 | 0.499  | 0.376  | 0.314  | 0.12   | 0.179  | -0.029 | 0.196  | 0.228  | 0.338  | 0.155  | 0.416  | 0.248  | 0.29   | 0.42   | 0.269  | 0.231  | 0.21   | 0.051  | 0.375  | 0.48  | 0.448  | 0.116  | 0.291 | 0.46  |
| -0.12  | 0.136  | -0.253 | -0.169 | -0.25  | -0.113 | 0.14   | -0.107 | 0.427  | -0.241 | 0.045  | 0.034  | -0.196 | 0.027  | -0.022 | -0.239 | 0.037  | -0.136 | -0.073 | 0.263  | 0.017  | -0.018 | 0.293  | 0.143  | -0.193 | 0.027  | 0.036  | 0.101  | 0.006 | 0.006  | -0.187 | 0.067 | 0.054 |
| 0.123  | -0.097 | -0.231 | 0.038  | 0.29   | 0.204  | 0.033  | -0.125 | 0.324  | -0.133 | -0.104 | -0.073 | 0.029  | -0.057 | -0.204 | 0.167  | -0.103 | 0.01   | -0.111 | -0.258 | 0.216  | 0.168  | -0.035 | -0.151 | -0.075 | 0.045  | 0.02   | -0.087 | 0.263 | -0.048 | -0.037 | 0.003 | 0.071 |
| 0.588  | 0.086  | 0.185  | 0.332  | 0.243  | 0.348  | 0.183  | 0.292  | 0.75   | 0.68   | 0.669  | 0.511  | 0.468  | 0.412  | 0.423  | 0.418  | 0.675  | 0.66   | 0.5    | 0.545  | 0.642  | 0.422  | 0.518  | 0.598  | 0.507  | 0.667  | 0.706  | 0.726  | 0.648 | 0.4    | 0.641  | 0.703 | 0.64  |
| 0.479  | 0.013  | 0.204  | 0.197  | 0.485  | 0.337  | 0.251  | 0.27   | 0.81   | 0.782  | 0.447  | 0.409  | 0.422  | 0.423  | 0.487  | 0.505  | 0.644  | 0.558  | 0.498  | 0.53   | 0.532  | 0.498  | 0.389  | 0.557  | 0.461  | 0.638  | 0.583  | 0.76   | 0.667 | 0.611  | 0.667  | 0.627 | 0.562 |
| 0.635  | -0.236 | 0.146  | 0.267  | 0.22   | 0.283  | 0.15   | -0.049 | 0.791  | 0.842  | 0.621  | 0.447  | 0.416  | 0.23   | 0.348  | 0.469  | 0.62   | 0.568  | 0.378  | 0.479  | 0.445  | 0.431  | 0.61   | 0.608  | 0.524  | 0.726  | 0.338  | 0.759  | 0.726 | 0.77   | 0.606  | 0.73  | 0.507 |
| -0.09  | 0.204  | 0.271  | 0.231  | 0.256  | 0.131  | 0.266  | 0.383  | 0.647  | 0.825  | 0.426  | 0.315  | 0.286  | 0.315  | 0.646  | 0.55   | 0.54   | 0.478  | 0.506  | 0.489  | 0.512  | 0.402  | 0.476  | 0.499  | 0.414  | 0.456  | 0.317  | 0.633  | 0.668 | 0.567  | 0.663  | 0.561 | 0.525 |
| -0.389 | 0.163  | 0.197  | 0.211  | 0.117  | 0.099  | 0.208  | 0.242  | 0.665  | 0.786  | 0.463  | 0.252  | 0.303  | 0.288  | 0.601  | 0.514  | 0.516  | 0.44   | 0.475  | 0.468  | 0.468  | 0.353  | 0.41   | 0.466  | 0.368  | 0.421  | 0.403  | 0.648  | 0.592 | 0.521  | 0.597  | 0.505 | 0.499 |
| -0.461 | 0.142  | 0.216  | 0.297  | 0.203  | 0.08   | 0.184  | 0.08   | 0.625  | 0.769  | 0.349  | 0.308  | 0.223  | 0.299  | 0.637  | 0.529  | 0.536  | 0.434  | 0.471  | 0.441  | 0.429  | 0.335  | 0.398  | 0.498  | 0.349  | 0.427  | 0.411  | 0.649  | 0.565 | 0.568  | 0.628  | 0.55  | 0.514 |
| -0.273 | 0.206  | 0.25   | 0.231  | 0.264  | 0.046  | 0.27   | 0.187  | 0.664  | 0.85   | 0.418  | 0.341  | 0.25   | 0.305  | 0.684  | 0.548  | 0.547  | 0.454  | 0.514  | 0.51   | 0.472  | 0.402  | 0.487  | 0.516  | 0.394  | 0.478  | 0.39   | 0.665  | 0.669 | 0.629  | 0.679  | 0.626 | 0.572 |
| 0.125  | -0.01  | 0.077  | 0.356  | 0.408  | 0.062  | 0.195  | 0.256  | 0.62   | 0.652  | 0.1    | 0.331  | 0.107  | 0.236  | 0.648  | 0.489  | 0.525  | 0.557  | 0.516  | 0.301  | 0.332  | 0.336  | 0.267  | 0.455  | 0.372  | 0.341  | 0.434  | 0.61   | 0.245 | 0.36   | 0.625  | 0.454 | 0.24  |
| 0.099  | 0.006  | -0.003 | 0.378  | 0.31   | -0.068 | 0.058  | 0.194  | 0.588  | 0.665  | 0.143  | 0.271  | 0.116  | 0.235  | 0.577  | 0.438  | 0.484  | 0.554  | 0.513  | 0.292  | 0.301  | 0.306  | 0.121  | 0.365  | 0.288  | 0.24   | 0.371  | 0.482  | 0.075 | 0.197  | 0.447  | 0.501 | 0.303 |
| -0.084 | 0.034  | 0.059  | 0.412  | 0.388  | 0.039  | 0.205  | 0.249  | 0.619  | 0.745  | 0.308  | 0.329  | 0.141  | 0.278  | 0.664  | 0.511  | 0.572  | 0.608  | 0.473  | 0.342  | 0.398  | 0.458  | 0.365  | 0.405  | 0.364  | 0.345  | 0.451  | 0.645  | 0.247 | 0.293  | 0.563  | 0.568 | 0.344 |
| -0.327 | -0.006 | 0.153  | 0.105  | 0.183  | 0.061  | 0.143  | 0.087  | 0.602  | 0.679  | 0.367  | 0.254  | 0.344  | 0.143  | 0.524  | 0.439  | 0.414  | 0.369  | 0.46   | 0.475  | 0.269  | 0.21   | 0.383  | 0.279  | 0.353  | 0.402  | 0.266  | 0.519  | 0.427 | 0.325  | 0.501  | 0.429 | 0.421 |
| -0.005 | 0.049  | 0.187  | 0.054  | 0.071  | 0.055  | 0.142  | 0.167  | 0.566  | 0.59   | 0.4    | 0.261  | 0.351  | 0.161  | 0.508  | 0.43   | 0.443  | 0.326  | 0.432  | 0.412  | 0.29   | 0.304  | 0.289  | 0.307  | 0.333  | 0.326  | 0.183  | 0.511  | 0.408 | 0.313  | 0.607  | 0.424 | 0.351 |
| 0.449  | -0.066 | 0.062  | 0.199  | -0.017 | 0.09   | 0.3    | -0.005 | 0.51   | 0.318  | 0.289  | 0.427  | 0.229  | 0.226  | 0.558  | 0.468  | 0.433  | 0.471  | 0.398  | 0.44   | 0.326  | 0.506  | 0.46   | 0.412  | 0.316  | 0.48   | 0.259  | 0.42   | 0.488 | 0.363  | 0.301  | 0.299 | 0.627 |
| 0.181  | -0.114 | -0.266 | 0.302  | -0.157 | 0.048  | 0.071  | -0.043 | 0.12   | 0.126  | -0.073 | 0.21   | -0.073 | 0.09   | 0.021  | 0.444  | 0.263  | 0.28   | 0.182  | 0.082  | 0.059  | 0.027  | 0.04   | 0.089  | 0.11   | -0.05  | -0.296 | -0.003 | 0.041 | 0.121  | 0.081  | 0.133 | 0.045 |
| -0.325 | 0.144  | 0.152  | 0.216  | 0.295  | 0.054  | 0.177  | 0      | 0.604  | 0.757  | 0.432  | 0.261  | 0.194  | 0.272  | 0.552  | 0.52   | 0.546  | 0.384  | 0.491  | 0.447  | 0.4    | 0.314  | 0.385  | 0.451  | 0.345  | 0.408  | 0.341  | 0.612  | 0.501 | 0.474  | 0.485  | 0.502 | 0.426 |
| -0.222 | 0.101  | 0.255  | 0.21   | 0.26   | 0.129  | 0.311  | 0.232  | 0.623  | 0.817  | 0.4    | 0.369  | 0.362  | 0.351  | 0.648  | 0.562  | 0.58   | 0.485  | 0.557  | 0.541  | 0.565  | 0.471  | 0.526  | 0.482  | 0.395  | 0.467  | 0.377  | 0.67   | 0.664 | 0.585  | 0.626  | 0.605 | 0.594 |
| -0.066 | 0.149  | 0.181  | 0.139  | 0.121  | 0.098  | 0.18   | 0.183  | 0.603  | 0.678  | 0.411  | 0.307  | 0.125  | 0.26   | 0.581  | 0.521  | 0.517  | 0.382  | 0.475  | 0.38   | 0.411  | 0.319  | 0.38   | 0.476  | 0.295  | 0.301  | 0.325  | 0.59   | 0.498 | 0.551  | 0.656  | 0.492 | 0.418 |
| 0.065  | 0.104  | 0.172  | 0.014  | 0.275  | 0.419  | -0.08  | 0.076  | 0.164  | 0.378  | 0.103  | 0.135  | 0.114  | 0.14   | 0.329  | 0.246  | -0.096 | 0.161  | 0.11   | 0.175  | 0.189  | 0.048  | 0.234  | 0.113  | 0.028  | -0.061 | 0.188  | 0.242  | 0.268 | 0.237  | 0.376  | 0.233 | 0.418 |
| 0.688  | 0.219  | 0.096  | 0.448  | 0.046  | 0.201  | 0.104  | 0.17   | 0.411  | 0.837  | -0.022 | 0.35   | 0.323  | 0.18   | 0.609  | 0.633  | 0.678  | 0.402  | 0.484  | 0.424  | 0.501  | 0.347  | 0.487  | 0.429  | 0.426  | 0.617  | 0.436  | 0.43   | 0.69  | 0.564  | 0.464  | 0.596 | 0.437 |
| 0.449  | 0.149  | 0.154  | 0.276  | 0.001  | -0.003 | 0.189  | 0.266  | 0.664  | 0.919  | 0.485  | 0.287  | 0.353  | 0.322  | 0.606  | 0.541  | 0.566  | 0.489  | 0.399  | 0.57   | 0.547  | 0.486  | 0.474  | 0.421  | 0.51   | 0.475  | 0.487  | 0.669  | 0.539 | 0.513  | 0.582  | 0.557 | 0.586 |
| 0.615  | -0.057 | 0.202  | 0.2    | 0.162  | 0.117  | 0.23   | 0.264  | 0.746  | 0.883  | 0.494  | 0.411  | 0.452  | 0.364  | 0.577  | 0.516  | 0.639  | 0.561  | 0.382  | 0.562  | 0.66   | 0.616  | 0.557  | 0.562  | 0.579  | 0.592  | 0.513  | 0.731  | 0.709 | 0.658  | 0.638  | 0.598 | 0.619 |
| 0.582  | 0.066  | 0.225  | 0.048  | 0.121  | -0.006 | 0.405  | 0.369  | 0.37   | 0.762  | 0.523  | 0.502  | 0.214  | 0.276  | 0.264  | 0.233  | 0.187  | 0.47   | 0.184  | 0.467  | 0.258  | 0.498  | 0.559  | 0.359  | 0.26   | 0.377  | 0.46   | 0.512  | 0.24  | 0.28   | 0.534  | 0.503 | 0.402 |
| 0.301  | -0.115 | 0.038  | -0.187 | -0.236 | 0.032  | 0.021  | -0.427 | 0.363  | 0.098  | 0.328  | 0.23   | 0.013  | 0.142  | 0.168  | -0.112 | 0.131  | 0.34   | 0.201  | -0.221 | 0.315  | 0.286  | 0.141  | 0.193  | 0.078  | 0.097  | 0.081  | 0.435  | 0.249 | 0.221  | 0.058  | 0.12  | 0.408 |
| 0.23   | -0.146 | -0.225 | 0.27   | -0.164 | 0.421  | -0.089 | 0.191  | 0.38   | 0.87   | 0.349  | 0.359  | 0.275  | 0.062  | 0.261  | 0.473  | 0.187  | 0.345  | 0.249  | 0.344  | 0.467  | 0.49   | 0.377  | 0.313  | 0.401  | 0.351  | 0.288  | 0.533  | 0.445 | 0.367  | 0.291  | 0.589 | 0.506 |
| 0.296  | 0.184  | -0.178 | -0.151 | -0.042 | 0.493  | -0.041 | -0.268 | -0.06  | -0.23  | 0.251  | 0.408  | -0.071 | 0.077  | -0.403 | 0.026  | -0.096 | 0.072  | 0.12   | 0.062  | -0.007 | 0.32   | -0.026 | 0.047  | -0.033 | -0.039 | -0.16  | 0.088  | 0.195 | 0.015  | 0.054  | 0.227 |       |
| 0.168  | 0.128  | -0.075 | 0.366  | 0.314  | 0.214  | 0.093  | 0.048  | 0.203  | 0.735  | 0.281  | 0.22   | -0.035 | 0.118  | 0.063  | 0.479  | -0.025 | 0.437  | 0.42   | 0.199  | 0.344  | 0.204  | -0.061 | 0.376  | 0.156  | 0.245  | 0.203  | 0.043  | 0.005 | -0.013 | 0.59   | 0.208 | -0.81 |
| 0.145  | -0.085 | 0.044  | 0.019  | -0.182 | 0.253  | -0.101 | 0.222  | 0.325  | 0.416  | 0.118  | 0.065  | 0.23   | 0.176  | 0.097  | 0.122  | 0.216  | 0.306  | 0.328  | 0.285  | 0.157  | -0.013 | 0.223  | 0.223  | 0.205  | 0.291  | 0.36   | 0.278  | 0.433 | 0.299  | 0.065  | 0.153 | -0.02 |
| 0.112  | -0.08  | 0.023  | 0.211  | -0.103 | 0.317  | -0.047 | 0.208  | 0.303  | 0.402  | 0.267  | -0.057 | 0.277  | 0.216  | 0.234  | 0.144  | 0.236  | 0.158  | 0.323  | 0.359  | 0.192  | 0.089  | 0.253  | 0.28   | 0.18   | 0.447  | 0.212  | 0.358  | 0.245 | 0.378  | 0.33   | 0.403 | 0.025 |
| 0.092  | 0.098  | 0.093  | 0.093  | 0.406  | 0.149  | 0.359  | 0.385  | 0.724  | 0.37   | 0.236  | 0.404  | 0.172  | 0.278  | 0.394  | 0.362  | 0.275  | 0.086  | 0.441  | 0.473  | 0.375  | 0.358  | 0.295  | 0.343  | 0.393  | 0.264  | 0.268  | 0.532  | 0.522 | 0.337  | 0.588  | 0.6   | 0.545 |
| 0.197  | 0.141  | 0.168  | 0.194  | -0.051 | 0.384  | 0.418  | 0.352  | 0.789  | 0.774  | 0.383  | 0.514  | 0.43   | 0.37   | 0.534  | 0.461  | 0.617  | 0.685  | 0.572  | 0.596  | 0.673  | 0.592  | 0.514  | 0.538  | 0.552  | 0.59   | 0.627  | 0.705  | 0.707 | 0.718  | 0.638  | 0.761 | 0.671 |
| 0.486  | -0.06  | 0.229  | 0.335  | 0.093  | 0.442  | 0.405  | 0.255  | 0.79   | 0.814  | 0.614  | 0.244  | 0.398  | 0.351  | 0.554  | 0.253  | 0.565  | 0.516  | 0.445  | 0.382  | 0.61   | 0.607  | 0.453  | 0.41   | 0.512  | 0.545  | 0.21   | 0.731  | 0.756 | 0.657  | 0.614  | 0.735 | 0.671 |
| 0.49   | -0.049 | 0.182  | -0.028 | 0.113  | 0.246  | 0.318  | 0.251  | 0.755  | 0.72   | 0.605  | 0.416  | 0.491  | 0.397  | 0.406  | 0.09   | 0.709  | 0.647  | 0.481  | 0.508  | 0.619  | 0.422  | 0.465  | 0.59   | 0.525  | 0.632  | 0.516  | 0.723  | 0.635 | 0.636  | 0.556  | 0.674 | 0.429 |
| -0.311 | 0.052  | 0.159  | 0.087  | 0.23   | 0.323  | 0.285  | 0.27   | 0.808  | 0.69   | 0.483  | 0.481  | 0.277  | 0.279  | -0.121 | 0.324  | 0.427  | 0.531  | 0.538  |        |        |        |        |        |        |        |        |        |       |        |        |       |       |
