# Supplementary material for: Analysis of PD-1 related immune transcriptional profile in different cancer types
Source: Springer Nature journal article supplement (doi:10.1186/s12935-018-0712-y), 2018-12-01

number of immune pathway genes

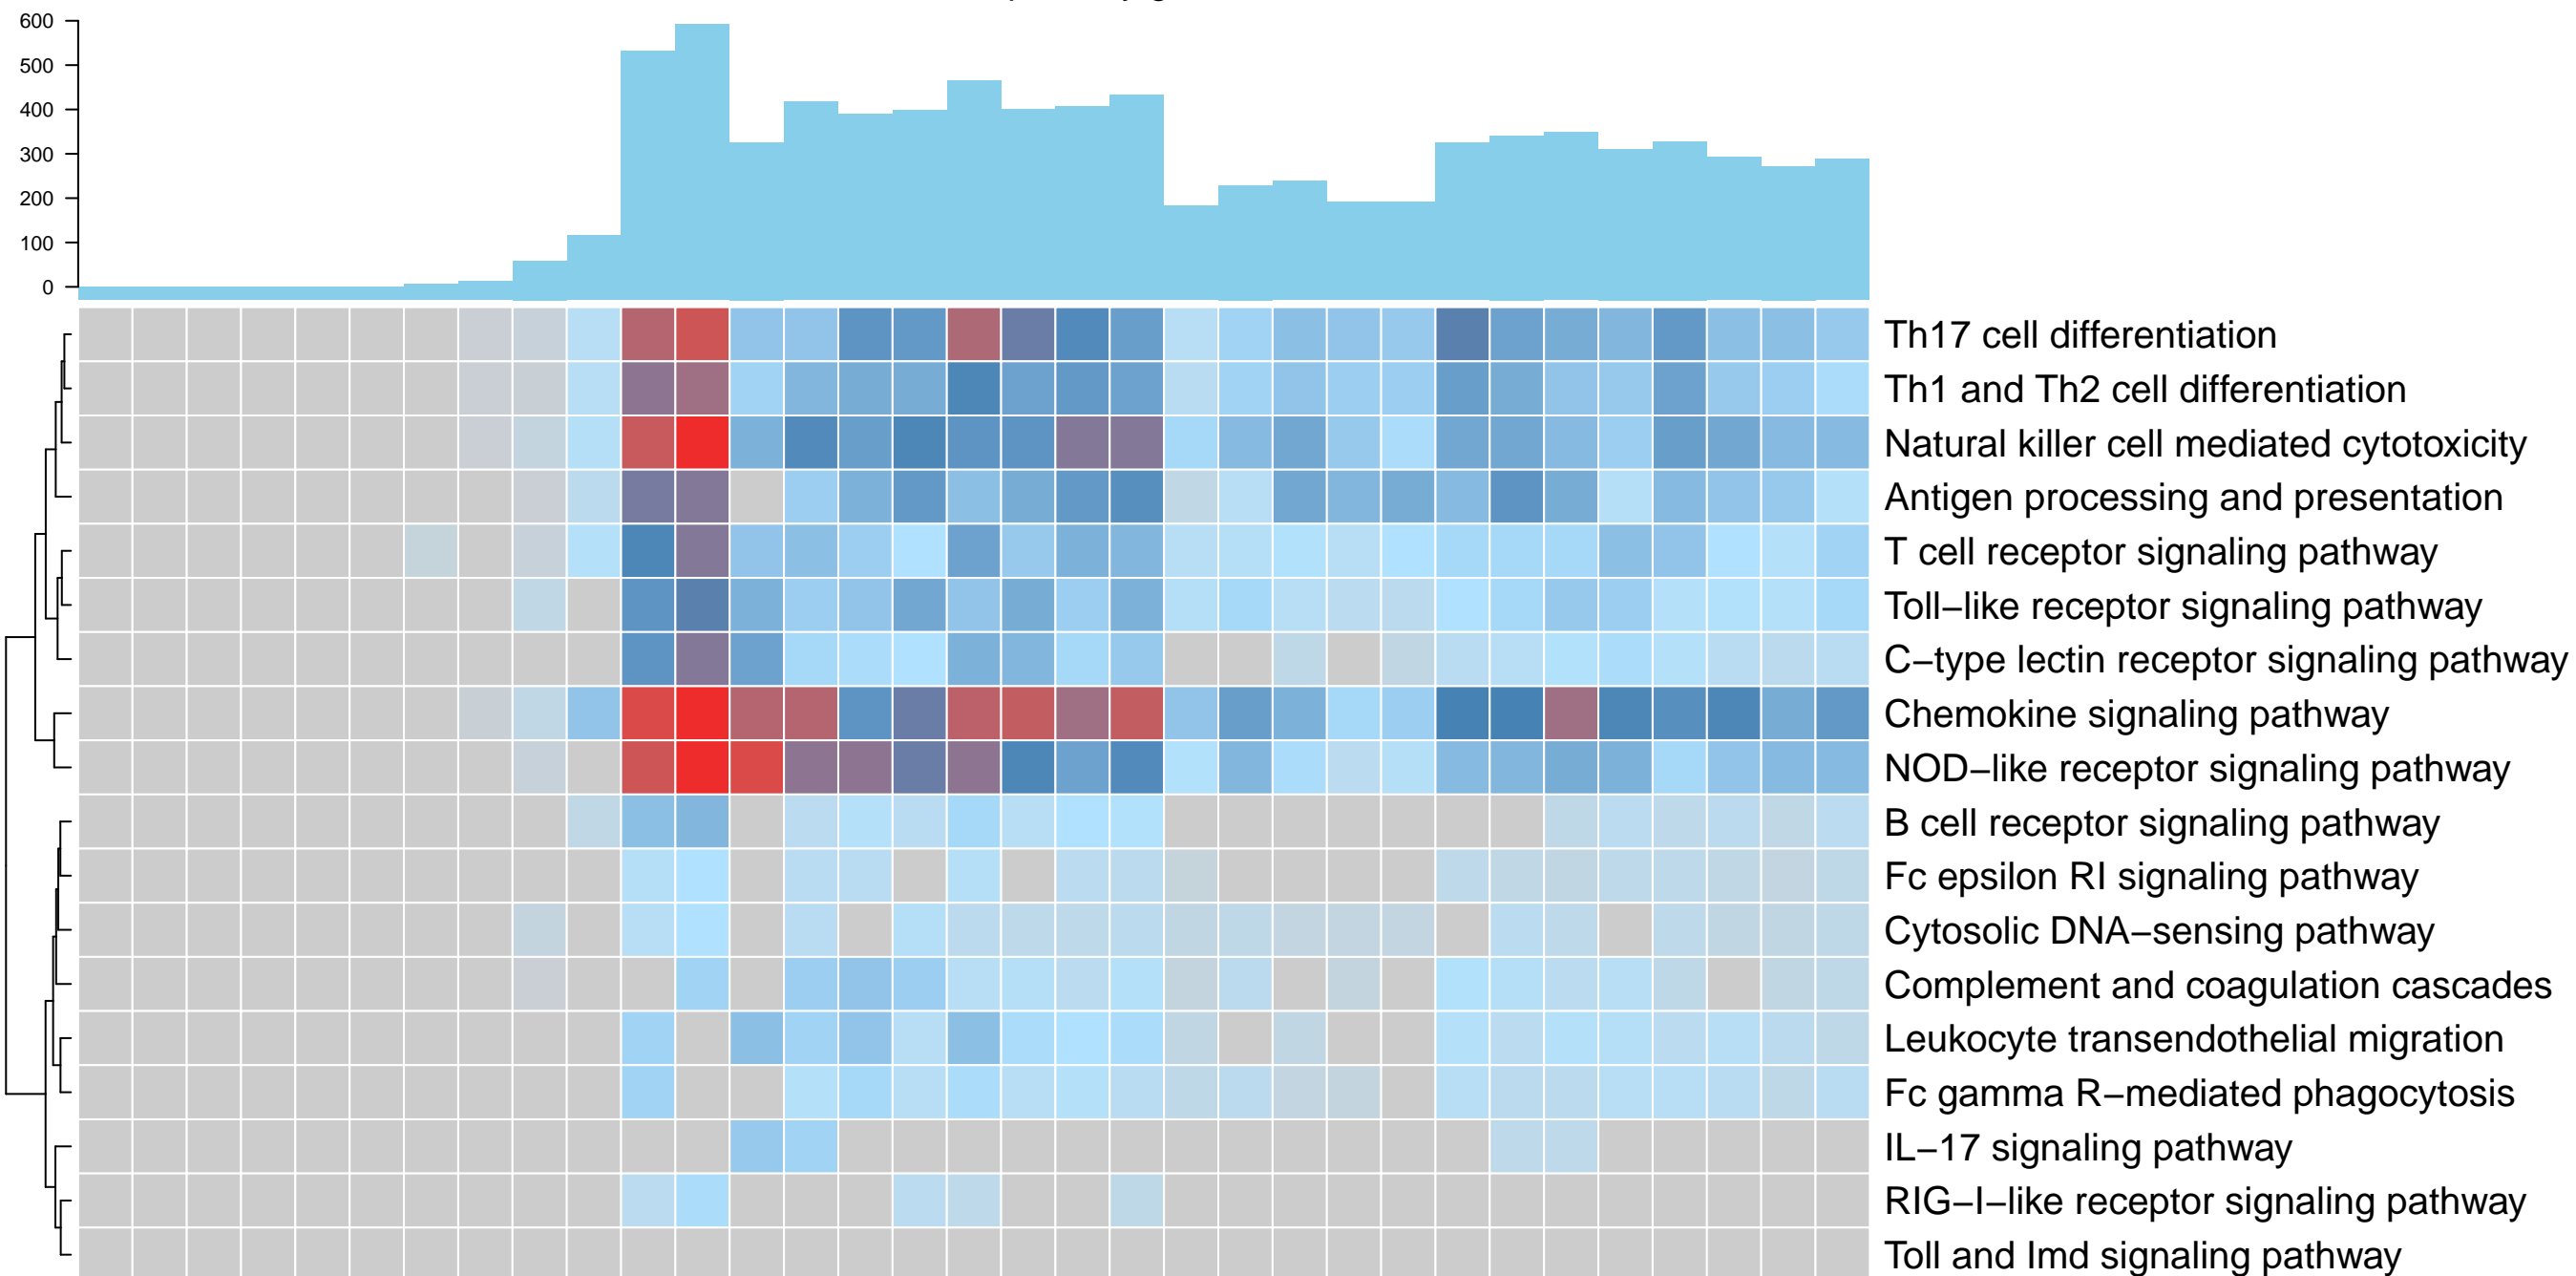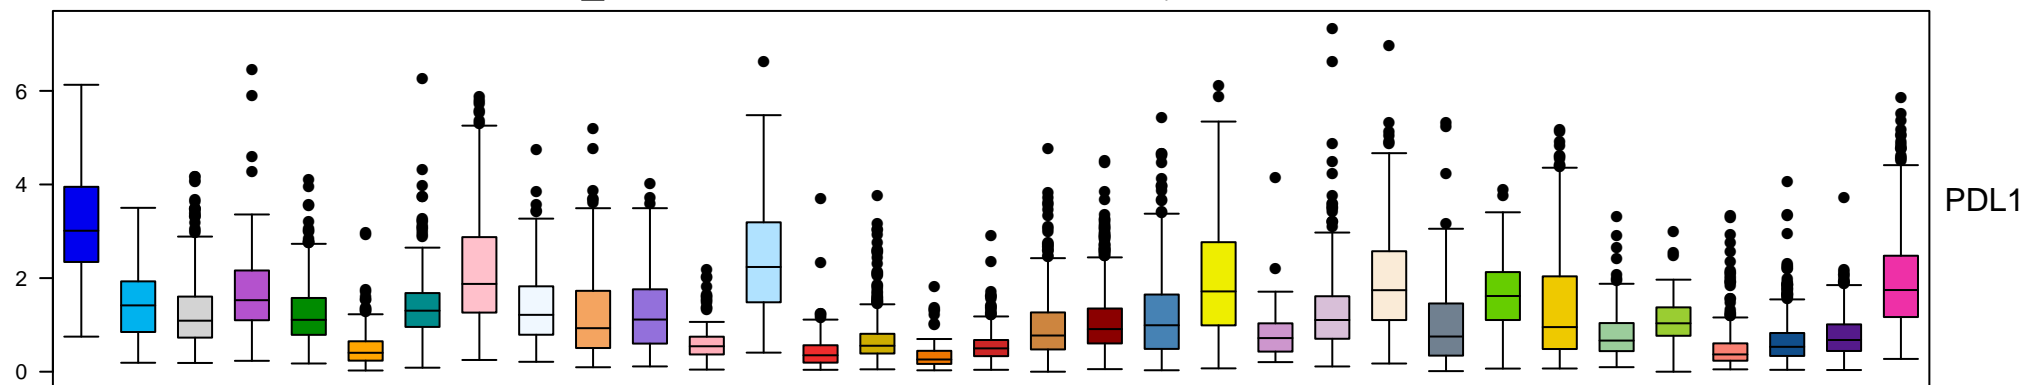

Supplement: MOESM5 [file 16359760]
